# Supplementary material
Source: publisher figshare collection journal article supplement (https://diabetesjournals.figshare.com/articles/dataset/_/26510815)
Supplement: Supplementary file 1 [file 1]

Supplementary Table 15: Pnliprp1 KD in AR42J - all results for p&lt;0.05

| Ensembl Gene ID     | Log2 FoldChange | Standard error | P value     | FDR         | Chr |
|---------------------|-----------------|----------------|-------------|-------------|-----|
| ENSRNOG00000002835  | -0.348515638    | 0.060685644    | 9.30E-09    | 0.000134878 | 10  |
| ENSRNOG00000019848  | -0.314076624    | 0.063814598    | 8.58E-07    | 0.002720272 | 3   |
| ENSRNOG000000025768 | -0.36151204     | 0.072455335    | 6.06E-07    | 0.002720272 | 9   |
| ENSRNOG000000050864 | 12.9941143      | 2.6495964      | 9.38E-07    | 0.002720272 | 3   |
| ENSRNOG000000053201 | -0.3235535      | 0.065270011    | 7.15E-07    | 0.002720272 | 3   |
| ENSRNOG00000006364  | -0.291532585    | 0.065847755    | 9.54E-06    | 0.019221324 | 6   |
| ENSRNOG000000008782 | -0.381790807    | 0.086248332    | 9.57E-06    | 0.019221324 | 5   |
| ENSRNOG000000017908 | -0.260837701    | 0.059221696    | 1.06E-05    | 0.019221324 | 1   |
| ENSRNOG000000004268 | -0.342961548    | 0.082991027    | 3.59E-05    | 0.048131978 | 6   |
| ENSRNOG000000013516 | -0.249338797    | 0.06020868     | 3.45E-05    | 0.048131978 | 9   |
| ENSRNOG000000019481 | 0.280630956     | 0.067974612    | 3.65E-05    | 0.048131978 | 8   |
| ENSRNOG000000012089 | -0.382950423    | 0.093803261    | 4.46E-05    | 0.053831859 | 3   |
| ENSRNOG000000004521 | -0.343085856    | 0.084890667    | 5.31E-05    | 0.05922966  | 6   |
| ENSRNOG000000057231 | -0.289604619    | 0.071987297    | 5.75E-05    | 0.059506457 | Y   |
| ENSRNOG000000049814 | -0.379999178    | 0.094958669    | 6.29E-05    | 0.060776007 | 3   |
| ENSRNOG000000000796 | -0.265876802    | 0.067465731    | 8.12E-05    | 0.073551008 | 20  |
| ENSRNOG000000012067 | -0.229988318    | 0.060316159    | 0.000137264 | 0.104739872 | 1   |
| ENSRNOG000000014501 | -0.249220936    | 0.065293799    | 0.00013513  | 0.104739872 | 4   |
| ENSRNOG000000019376 | -0.308283234    | 0.080325473    | 0.000124078 | 0.104739872 | 1   |
| ENSRNOG000000019082 | 0.268899584     | 0.071040678    | 0.000153616 | 0.108827559 | 1   |
| ENSRNOG000000060100 | -0.291300691    | 0.077089699    | 0.000157634 | 0.108827559 | 3   |
| ENSRNOG000000004130 | -0.301718307    | 0.080571137    | 0.000180578 | 0.119000632 | 14  |
| ENSRNOG000000017194 | -0.334325861    | 0.090321572    | 0.000214323 | 0.129469188 | 5   |
| ENSRNOG000000040153 | -8.490144331    | 2.290798463    | 0.000210397 | 0.129469188 | 6   |
| ENSRNOG000000026542 | -0.25380439     | 0.068866374    | 0.000228288 | 0.132388978 | 13  |
| ENSRNOG000000006236 | -0.351551443    | 0.097044938    | 0.000291698 | 0.153514383 | 3   |
| ENSRNOG000000010248 | -0.238781365    | 0.06592493     | 0.000292312 | 0.153514383 | 2   |
| ENSRNOG000000012455 | -0.276988717    | 0.076563892    | 0.00029718  | 0.153514383 | 5   |
| ENSRNOG000000056458 | -0.339511906    | 0.094066889    | 0.000307071 | 0.153514383 | 7   |
| ENSRNOG000000003714 | -0.342788674    | 0.095841168    | 0.000348048 | 0.154988208 | 10  |
| ENSRNOG000000010407 | -0.43577663     | 0.121176633    | 0.000322887 | 0.154988208 | 4   |
| ENSRNOG000000022325 | -0.249207221    | 0.069591284    | 0.000342266 | 0.154988208 | 5   |
| ENSRNOG000000059938 | 0.902044864     | 0.252454439    | 0.00035278  | 0.154988208 | 1   |
| ENSRNOG000000003399 | -0.222321291    | 0.062364605    | 0.000364046 | 0.155233452 | 10  |
| ENSRNOG000000001829 | -0.38282328     | 0.108613648    | 0.000424069 | 0.161793635 | 11  |
| ENSRNOG000000008837 | 0.274450706     | 0.077845554    | 0.000422557 | 0.161793635 | 3   |
| ENSRNOG000000010580 | 0.227990431     | 0.064539263    | 0.000411518 | 0.161793635 | 5   |
| ENSRNOG000000033262 | 0.237948968     | 0.067259721    | 0.000403532 | 0.161793635 | 7   |
| ENSRNOG000000002598 | 0.453777457     | 0.12922504     | 0.000445537 | 0.162706292 | 10  |
| ENSRNOG000000060098 | 0.224335306     | 0.063921832    | 0.000448907 | 0.162706292 | 4   |
| ENSRNOG000000001766 | -0.20304905     | 0.05797396     | 0.000461055 | 0.163033689 | 11  |
| ENSRNOG000000009596 | 11.56844331     | 3.342627586    | 0.000538407 | 0.165365319 | 15  |
| ENSRNOG000000013376 | 0.244290871     | 0.070522433    | 0.000532174 | 0.165365319 | 19  |
| ENSRNOG000000015221 | 0.229425419     | 0.065786864    | 0.000487733 | 0.165365319 | 1   |
| ENSRNOG000000045819 | 1.183702833     | 0.340044284    | 0.000499498 | 0.165365319 | 4   |
| ENSRNOG000000046021 | 0.275680056     | 0.079373103    | 0.000514258 | 0.165365319 | X   |
| ENSRNOG000000055743 | 5.734336122     | 1.658173897    | 0.00054375  | 0.165365319 | 10  |
| ENSRNOG000000057817 | 0.251254903     | 0.07269317     | 0.000547492 | 0.165365319 | 3   |

|                    |              |             |             |               |    |
|--------------------|--------------|-------------|-------------|---------------|----|
| ENSRNOG00000007665 | -0.241124437 | 0.070085368 | 0.000580771 | 0.168161091   | 3  |
| ENSRNOG00000010827 | -0.406688657 | 0.118379617 | 0.000591545 | 0.168161091   | 2  |
| ENSRNOG00000056753 | -0.229862324 | 0.066718252 | 0.000570491 | 0.168161091   | 1  |
| ENSRNOG00000018522 | -0.250726056 | 0.073321872 | 0.000627303 | 0.174896948   | 1  |
| ENSRNOG00000018567 | -0.261808649 | 0.0768892   | 0.000661611 | 0.180981937   | 3  |
| ENSRNOG00000009329 | 0.231538112  | 0.068613585 | 0.000739438 | 0.181701152   | 10 |
| ENSRNOG00000010274 | -0.231666791 | 0.068402299 | 0.000707058 | 0.181701152   | 2  |
| ENSRNOG00000011804 | -0.248804211 | 0.073640722 | 0.000728499 | 0.181701152   | 5  |
| ENSRNOG00000030572 | -0.238955063 | 0.070432832 | 0.00069216  | 0.181701152   | 1  |
| ENSRNOG00000050669 | -0.340272699 | 0.1008343   | 0.000739303 | 0.181701152   | 9  |
| ENSRNOG00000053961 | 0.366917233  | 0.108023403 | 0.000682172 | 0.181701152   | 10 |
| ENSRNOG00000010155 | -0.208573752 | 0.062310123 | 0.000815883 | 0.1950921     | 16 |
| ENSRNOG00000046832 | -1.860435482 | 0.556072915 | 0.000820846 | 0.1950921 X   |    |
| ENSRNOG00000054204 | -0.325685684 | 0.097921854 | 0.000881097 | 0.206034556   | 2  |
| ENSRNOG00000011586 | -0.267011248 | 0.080875285 | 0.00096163  | 0.220325779   | 2  |
| ENSRNOG00000021264 | -0.305777241 | 0.092829179 | 0.000987804 | 0.220325779   | 3  |
| ENSRNOG00000054459 | -2.379749128 | 0.721892374 | 0.000978827 | 0.220325779   | 1  |
| ENSRNOG00000010999 | -0.306664289 | 0.093286458 | 0.001011387 | 0.222168018   | 8  |
| ENSRNOG00000051408 | -0.19981666  | 0.060932196 | 0.001040546 | 0.225161715 X |    |
| ENSRNOG00000002420 | -0.252954073 | 0.077780767 | 0.001145389 | 0.235925386   | 10 |
| ENSRNOG00000020266 | 0.193799379  | 0.059602128 | 0.00114777  | 0.235925386   | 7  |
| ENSRNOG00000030807 | 0.38166687   | 0.117447799 | 0.00115538  | 0.235925386   | 1  |
| ENSRNOG00000056207 | -0.288165099 | 0.08849929  | 0.001129424 | 0.235925386   | 4  |
| ENSRNOG00000030628 | -0.244967928 | 0.075522304 | 0.001180086 | 0.237623461   | 10 |
| ENSRNOG00000003160 | 10.80885078  | 3.343069166 | 0.001224068 | 0.240819167 X |    |
| ENSRNOG00000014380 | -0.324785244 | 0.100489813 | 0.001229178 | 0.240819167   | 1  |
| ENSRNOG00000017777 | 0.19103404   | 0.05928603  | 0.001271909 | 0.242633343   | 3  |
| ENSRNOG00000024056 | -0.394773379 | 0.122504722 | 0.001270702 | 0.242633343   | 1  |
| ENSRNOG00000002711 | -0.334980071 | 0.104429265 | 0.001337907 | 0.24491075    | 13 |
| ENSRNOG00000013023 | 0.210187168  | 0.065584478 | 0.001351418 | 0.24491075    | 1  |
| ENSRNOG00000018233 | 0.191691331  | 0.059797204 | 0.001347388 | 0.24491075    | 16 |
| ENSRNOG00000021691 | 0.207639945  | 0.064679664 | 0.001326049 | 0.24491075    | 12 |
| ENSRNOG00000003359 | -0.271876857 | 0.085235313 | 0.001424103 | 0.245202713 X |    |
| ENSRNOG00000004711 | 0.211888405  | 0.066324269 | 0.001399597 | 0.245202713   | 6  |
| ENSRNOG00000020075 | 0.188645193  | 0.05914283  | 0.00142443  | 0.245202713   | 1  |
| ENSRNOG00000020590 | 0.177406536  | 0.055724952 | 0.001454506 | 0.245202713   | 2  |
| ENSRNOG00000029941 | 0.192870735  | 0.060500767 | 0.001433073 | 0.245202713   | 7  |
| ENSRNOG00000032778 | -0.218711881 | 0.068660021 | 0.001445377 | 0.245202713   | 3  |
| ENSRNOG00000026226 | -0.207533433 | 0.065269102 | 0.001474489 | 0.245714213   | 5  |
| ENSRNOG00000002618 | -0.181960736 | 0.05737405  | 0.001516635 | 0.246440494   | 13 |
| ENSRNOG00000003844 | -0.203451922 | 0.064189651 | 0.001526783 | 0.246440494   | 14 |
| ENSRNOG00000015921 | -0.40790779  | 0.128719667 | 0.001529842 | 0.246440494   | 15 |
| ENSRNOG00000009990 | -0.242811257 | 0.076880445 | 0.001586939 | 0.252604409   | 2  |
| ENSRNOG00000060047 | 4.350895568  | 1.378886469 | 0.001602953 | 0.252604409   | 1  |
| ENSRNOG00000006542 | 0.198468426  | 0.063352192 | 0.001731597 | 0.268197996   | 10 |
| ENSRNOG00000019351 | -6.423400966 | 2.053231717 | 0.001757402 | 0.268197996   | 1  |
| ENSRNOG00000025923 | 0.24926282   | 0.079629712 | 0.001746433 | 0.268197996   | 14 |
| ENSRNOG00000003905 | 0.195439104  | 0.062540591 | 0.001778074 | 0.268526242   | 10 |
| ENSRNOG00000016622 | -0.556518516 | 0.178601708 | 0.001833376 | 0.274023572 X |    |
| ENSRNOG00000001833 | -0.266823711 | 0.085895552 | 0.00189397  | 0.28019158    | 11 |

|                     |              |             |             |                |    |
|---------------------|--------------|-------------|-------------|----------------|----|
| ENSRNOG00000000520  | -0.208342358 | 0.067152917 | 0.001918894 | 0.281011315    | 20 |
| ENSRNOG00000000185  | 0.215561013  | 0.069597776 | 0.001953317 | 0.281564913    | 7  |
| ENSRNOG000000027035 | -0.246691707 | 0.079680831 | 0.001961516 | 0.281564913    | 9  |
| ENSRNOG000000005513 | -0.246634204 | 0.079791891 | 0.001995049 | 0.283570851    | 6  |
| ENSRNOG000000001592 | -0.220019014 | 0.071398495 | 0.002059164 | 0.284321501    | 11 |
| ENSRNOG000000002625 | -0.202354396 | 0.065621852 | 0.002044825 | 0.284321501    | 13 |
| ENSRNOG000000011480 | -0.268416025 | 0.087034276 | 0.002042193 | 0.284321501    | 1  |
| ENSRNOG000000005158 | -0.333784149 | 0.108849261 | 0.002165949 | 0.288827938    | 3  |
| ENSRNOG000000006221 | -0.223815994 | 0.072956226 | 0.002156321 | 0.288827938    | 4  |
| ENSRNOG000000017071 | 0.242242901  | 0.0788349   | 0.002120694 | 0.288827938    | 16 |
| ENSRNOG000000026236 | -0.249366404 | 0.081340326 | 0.002171489 | 0.288827938    | 11 |
| ENSRNOG000000000693 | 0.257535498  | 0.084287801 | 0.002247378 | 0.292159044    | 12 |
| ENSRNOG000000003520 | 0.224787748  | 0.07406988  | 0.002406901 | 0.292159044    | 19 |
| ENSRNOG000000005258 | -0.200589769 | 0.066295218 | 0.002480542 | 0.292159044    | 3  |
| ENSRNOG000000008000 | 0.181204814  | 0.059633894 | 0.002376635 | 0.292159044    | 3  |
| ENSRNOG000000010027 | -0.27120955  | 0.089630224 | 0.002479175 | 0.292159044    | 8  |
| ENSRNOG000000010608 | -0.335042137 | 0.110353515 | 0.002396755 | 0.292159044    | 8  |
| ENSRNOG000000016705 | -0.238002641 | 0.078204129 | 0.00233959  | 0.292159044    | 17 |
| ENSRNOG000000016971 | -0.315265248 | 0.103651453 | 0.00235332  | 0.292159044    | 19 |
| ENSRNOG000000017404 | -0.205751484 | 0.067353702 | 0.002252174 | 0.292159044    | 3  |
| ENSRNOG000000017751 | -0.226234237 | 0.074152138 | 0.002281209 | 0.292159044    | 1  |
| ENSRNOG000000018929 | -0.259811002 | 0.085229297 | 0.002300813 | 0.292159044    | 1  |
| ENSRNOG000000020391 | -0.40684895  | 0.134525355 | 0.002491852 | 0.292159044    | 19 |
| ENSRNOG000000022082 | 1.268957467  | 0.419700169 | 0.002498808 | 0.292159044    | 4  |
| ENSRNOG000000043151 | -0.231976948 | 0.076497703 | 0.002425616 | 0.292159044    | 5  |
| ENSRNOG000000045752 | -0.234664605 | 0.077071781 | 0.002328708 | 0.292159044    | 1  |
| ENSRNOG000000014199 | 0.201069382  | 0.066648515 | 0.002554059 | 0.296230031    | 16 |
| ENSRNOG000000009935 | -0.187908562 | 0.062419712 | 0.002609002 | 0.297255511    | 14 |
| ENSRNOG000000017309 | -0.185012221 | 0.061449199 | 0.002605468 | 0.297255511    | 5  |
| ENSRNOG000000027234 | -0.259319943 | 0.086192452 | 0.002624411 | 0.297255511    | 17 |
| ENSRNOG000000016064 | 0.178618609  | 0.059526971 | 0.002694188 | 0.302793348    | 16 |
| ENSRNOG000000005907 | -0.334963039 | 0.112453109 | 0.002894828 | 0.317948568    | 4  |
| ENSRNOG000000010861 | -0.23619738  | 0.079241946 | 0.002875796 | 0.317948568    | 1  |
| ENSRNOG000000013727 | -0.216503799 | 0.072593416 | 0.002859827 | 0.317948568    | 9  |
| ENSRNOG000000003011 | 0.289165394  | 0.097494223 | 0.003017254 | 0.318188139    | 19 |
| ENSRNOG000000004908 | -0.213039041 | 0.071840635 | 0.00302251  | 0.318188139    | 6  |
| ENSRNOG000000008895 | 0.193030635  | 0.064875129 | 0.002925895 | 0.318188139    | 3  |
| ENSRNOG000000017191 | -0.258092115 | 0.086864281 | 0.002966278 | 0.318188139    | 1  |
| ENSRNOG000000048114 | 0.369225964  | 0.124536095 | 0.003028691 | 0.318188139    | 17 |
| ENSRNOG000000059350 | -0.198366374 | 0.066740411 | 0.002956665 | 0.318188139    | 4  |
| ENSRNOG000000045844 | -0.23046854  | 0.078008722 | 0.003132832 | 0.326532113    | 18 |
| ENSRNOG000000053635 | -0.363105078 | 0.12298648  | 0.003153159 | 0.326532113    | 17 |
| ENSRNOG000000051238 | -0.260743324 | 0.088505384 | 0.003218364 | 0.330797949    | 15 |
| ENSRNOG000000052613 | 2.299662256  | 0.781134908 | 0.003239985 | 0.330797949    | 2  |
| ENSRNOG000000007076 | -0.355557433 | 0.120929395 | 0.003279932 | 0.331597781    | 7  |
| ENSRNOG000000017832 | -0.21956052  | 0.074707851 | 0.003293563 | 0.331597781    | 18 |
| ENSRNOG000000029707 | -0.186984688 | 0.063855898 | 0.003408989 | 0.338517307 MT |    |
| ENSRNOG000000050805 | 0.261272237  | 0.089185915 | 0.003394821 | 0.338517307    | 12 |
| ENSRNOG000000014516 | 0.184273724  | 0.062992831 | 0.003441103 | 0.339381728    | 9  |
| ENSRNOG000000001344 | 0.187267063  | 0.064205005 | 0.003537501 | 0.342073254    | 12 |

|                    |              |             |             |             |    |
|--------------------|--------------|-------------|-------------|-------------|----|
| ENSRNOG00000002753 | -0.738658136 | 0.25722591  | 0.004083583 | 0.342073254 | 10 |
| ENSRNOG00000006235 | 0.160925471  | 0.055550265 | 0.003768286 | 0.342073254 | 7  |
| ENSRNOG00000006534 | -0.207704858 | 0.072286452 | 0.004061336 | 0.342073254 | 4  |
| ENSRNOG00000009156 | -0.213158457 | 0.07440624  | 0.004172822 | 0.342073254 | 4  |
| ENSRNOG00000010077 | 0.24682622   | 0.085547092 | 0.003910815 | 0.342073254 | 4  |
| ENSRNOG00000011555 | -0.298006478 | 0.103866619 | 0.00411607  | 0.342073254 | 2  |
| ENSRNOG00000013356 | -0.271611614 | 0.094770203 | 0.004156913 | 0.342073254 | 2  |
| ENSRNOG00000013411 | -0.2736391   | 0.094869604 | 0.003921969 | 0.342073254 | 2  |
| ENSRNOG00000013618 | -0.336719371 | 0.117620965 | 0.004199823 | 0.342073254 | 16 |
| ENSRNOG00000013977 | -0.196406557 | 0.067427762 | 0.003581534 | 0.342073254 | 9  |
| ENSRNOG00000014303 | 0.191423431  | 0.066841524 | 0.004185393 | 0.342073254 | 1  |
| ENSRNOG00000015140 | -0.33328515  | 0.1163021   | 0.004161084 | 0.342073254 | 2  |
| ENSRNOG00000015275 | -0.309412106 | 0.107566619 | 0.00402151  | 0.342073254 | 18 |
| ENSRNOG00000016813 | -0.255606904 | 0.089186135 | 0.004157025 | 0.342073254 | 4  |
| ENSRNOG00000019326 | -0.253568496 | 0.087807161 | 0.003879608 | 0.342073254 | 19 |
| ENSRNOG00000019459 | 0.200296218  | 0.069639328 | 0.004025022 | 0.342073254 | 7  |
| ENSRNOG00000019638 | 0.199197503  | 0.068849143 | 0.003812826 | 0.342073254 | 2  |
| ENSRNOG00000019986 | -0.23368463  | 0.081178816 | 0.003993933 | 0.342073254 | 4  |
| ENSRNOG00000020989 | 0.204396172  | 0.070983088 | 0.003982997 | 0.342073254 | 1  |
| ENSRNOG00000021027 | 0.171826906  | 0.059383413 | 0.003809539 | 0.342073254 | 1  |
| ENSRNOG00000022845 | -0.256306062 | 0.087917666 | 0.003553508 | 0.342073254 | 8  |
| ENSRNOG00000024671 | -0.179203726 | 0.062207476 | 0.003967395 | 0.342073254 | 18 |
| ENSRNOG00000027408 | -0.281206062 | 0.096945403 | 0.003723727 | 0.342073254 | 2  |
| ENSRNOG00000031031 | -0.205909746 | 0.071071363 | 0.003764793 | 0.342073254 | 5  |
| ENSRNOG00000032735 | -0.295335655 | 0.101574661 | 0.003642463 | 0.342073254 | 2  |
| ENSRNOG00000040287 | -0.281545407 | 0.098279821 | 0.004173615 | 0.342073254 | 6  |
| ENSRNOG00000053086 | -0.252357404 | 0.087223543 | 0.003813071 | 0.342073254 | 2  |
| ENSRNOG00000059443 | 5.680151247  | 1.961806608 | 0.003787148 | 0.342073254 | 2  |
| ENSRNOG00000059479 | 0.224366005  | 0.077949924 | 0.003997802 | 0.342073254 | 14 |
| ENSRNOG00000060693 | -0.313265837 | 0.108766444 | 0.003974609 | 0.342073254 | 1  |
| ENSRNOG00000028176 | -0.245666597 | 0.085932589 | 0.004252076 | 0.344394436 | 19 |
| ENSRNOG00000025604 | -0.221910022 | 0.077799662 | 0.004340052 | 0.345725701 | 7  |
| ENSRNOG00000028137 | -0.222610065 | 0.078015462 | 0.004325284 | 0.345725701 | 1  |
| ENSRNOG00000033065 | -0.255614098 | 0.089614505 | 0.004339399 | 0.345725701 | 10 |
| ENSRNOG00000052406 | -0.373856476 | 0.13132504  | 0.004416072 | 0.349859117 | 1  |
| ENSRNOG00000011652 | -0.212306352 | 0.074774242 | 0.004521292 | 0.356248326 | 3  |
| ENSRNOG00000019069 | -0.207774538 | 0.073276771 | 0.004575743 | 0.357254377 | 1  |
| ENSRNOG00000022619 | 0.182612184  | 0.064414696 | 0.004583344 | 0.357254377 | 1  |
| ENSRNOG00000002914 | 0.194306347  | 0.068663376 | 0.004657133 | 0.357411013 | 19 |
| ENSRNOG00000006864 | -0.281531014 | 0.099427042 | 0.004632536 | 0.357411013 | 8  |
| ENSRNOG00000014353 | 0.189559904  | 0.066989633 | 0.00465931  | 0.357411013 | 1  |
| ENSRNOG00000038572 | -0.287146447 | 0.101548588 | 0.004688732 | 0.357774915 | 14 |
| ENSRNOG00000052025 | 0.168127101  | 0.059648777 | 0.004823092 | 0.366100466 | 7  |
| ENSRNOG00000006792 | -0.249123296 | 0.088495366 | 0.004876207 | 0.366586671 | 8  |
| ENSRNOG00000057823 | 0.19761732   | 0.070205387 | 0.004880068 | 0.366586671 | 12 |
| ENSRNOG00000014173 | -0.18554374  | 0.065983893 | 0.004924139 | 0.367990544 | 1  |
| ENSRNOG00000001442 | 0.198166428  | 0.070581507 | 0.004990825 | 0.369168299 | 12 |
| ENSRNOG00000011740 | -0.245289326 | 0.087345493 | 0.004980916 | 0.369168299 | 9  |
| ENSRNOG00000007899 | -0.323418868 | 0.115468874 | 0.005095744 | 0.371161415 | 4  |
| ENSRNOG00000010386 | 0.210173235  | 0.075022039 | 0.005086776 | 0.371161415 | 8  |

|                     |              |             |             |             |             |
|---------------------|--------------|-------------|-------------|-------------|-------------|
| ENSRNOG00000024863  | -0.259555308 | 0.09258243  | 0.005055044 | 0.371161415 | 8           |
| ENSRNOG00000043006  | -0.194298441 | 0.069407809 | 0.005120174 | 0.371161415 | 8           |
| ENSRNOG00000019760  | -0.286598134 | 0.102690895 | 0.005256469 | 0.372221241 | 16          |
| ENSRNOG00000021731  | 0.512181242  | 0.183180825 | 0.005173271 | 0.372221241 | 10          |
| ENSRNOG00000032776  | -0.208780614 | 0.074778952 | 0.005238816 | 0.372221241 | 6           |
| ENSRNOG00000038074  | 0.187322096  | 0.067129237 | 0.005263164 | 0.372221241 | 15          |
| ENSRNOG00000055765  | 0.169161909  | 0.060619371 | 0.005261717 | 0.372221241 | KL568414.1  |
| ENSRNOG00000002349  | -0.389151034 | 0.140259715 | 0.005528608 | 0.389095939 | 14          |
| ENSRNOG00000029574  | -0.229355445 | 0.082855704 | 0.005637878 | 0.392970968 | 4           |
| ENSRNOG00000050827  | -1.144302725 | 0.413198354 | 0.005616331 | 0.392970968 | 1           |
| ENSRNOG00000005492  | 0.202265469  | 0.073120767 | 0.005671659 | 0.393434031 | 6           |
| ENSRNOG00000011688  | -0.94473923  | 0.341997541 | 0.005737545 | 0.394231895 | 16          |
| ENSRNOG00000051258  | -0.314671961 | 0.113856854 | 0.005714118 | 0.394231895 | 2           |
| ENSRNOG00000020769  | -0.197927845 | 0.071785399 | 0.005829584 | 0.398666553 | 10          |
| ENSRNOG00000019553  | 0.202210804  | 0.073400764 | 0.005871242 | 0.399630373 | 15          |
| ENSRNOG00000003889  | -0.198897881 | 0.072264437 | 0.00591671  | 0.400843266 | 7           |
| ENSRNOG00000011517  | 0.173410573  | 0.063058229 | 0.005959398 | 0.401857471 | 9           |
| ENSRNOG00000040297  | -0.227267496 | 0.082828832 | 0.006072863 | 0.403315111 | 2           |
| ENSRNOG00000045765  | 0.177989447  | 0.064853171 | 0.006060338 | 0.403315111 | 7           |
| ENSRNOG00000053231  | 0.219736506  | 0.079999565 | 0.006019427 | 0.403315111 | AABR0702410 |
| ENSRNOG00000058904  | -0.210001764 | 0.076565508 | 0.006092289 | 0.403315111 | X           |
| ENSRNOG00000017310  | -0.248631143 | 0.090920399 | 0.006245566 | 0.411582823 | 2           |
| ENSRNOG00000007970  | -0.225276546 | 0.082473068 | 0.006304359 | 0.413577336 | 7           |
| ENSRNOG00000015206  | 0.21132787   | 0.077420257 | 0.006340739 | 0.414090273 | 5           |
| ENSRNOG00000010635  | 0.149484519  | 0.054814648 | 0.006389547 | 0.415406499 | 10          |
| ENSRNOG00000015733  | 0.190975833  | 0.070095374 | 0.006439619 | 0.416792822 | 9           |
| ENSRNOG00000013009  | -0.188904011 | 0.069379357 | 0.006473717 | 0.417137537 | 1           |
| ENSRNOG00000031053  | -0.192906635 | 0.070997726 | 0.006586031 | 0.422496834 | MT          |
| ENSRNOG00000057464  | -0.194713548 | 0.071724094 | 0.006632425 | 0.423598647 | X           |
| ENSRNOG00000010588  | 0.185072568  | 0.068464968 | 0.006868125 | 0.431212608 | 7           |
| ENSRNOG00000012354  | -0.25239434  | 0.093373856 | 0.006870611 | 0.431212608 | 2           |
| ENSRNOG00000013166  | 0.169517471  | 0.062628331 | 0.006795117 | 0.431212608 | 5           |
| ENSRNOG00000030680  | -0.162286096 | 0.059998002 | 0.006833352 | 0.431212608 | 10          |
| ENSRNOG00000002343  | 0.170538021  | 0.063311741 | 0.007067986 | 0.432585057 | 14          |
| ENSRNOG00000006749  | -0.219040608 | 0.081534096 | 0.007220691 | 0.432585057 | 7           |
| ENSRNOG00000007315  | -0.232895943 | 0.086307727 | 0.006966597 | 0.432585057 | X           |
| ENSRNOG00000010668  | 0.192771904  | 0.071465692 | 0.006988226 | 0.432585057 | 10          |
| ENSRNOG00000012269  | 0.152575754  | 0.056610404 | 0.007034865 | 0.432585057 | 4           |
| ENSRNOG00000018977  | 0.149468991  | 0.055628787 | 0.007211853 | 0.432585057 | 7           |
| ENSRNOG00000025302  | -0.272915873 | 0.101134238 | 0.006964212 | 0.432585057 | 15          |
| ENSRNOG00000029698  | 0.189834497  | 0.070549107 | 0.007127801 | 0.432585057 | 7           |
| ENSRNOG00000045539  | -0.276524205 | 0.102795125 | 0.007144094 | 0.432585057 | 4           |
| ENSRNOG00000050323  | -0.151591907 | 0.05634277  | 0.007133864 | 0.432585057 | 10          |
| ENSRNOG000000061740 | 0.218818382  | 0.081408568 | 0.007190215 | 0.432585057 | AABR0702410 |
| ENSRNOG00000001128  | 0.32598388   | 0.121605837 | 0.007347717 | 0.433037411 | 12          |
| ENSRNOG00000013250  | 1.104388351  | 0.411636449 | 0.007298208 | 0.433037411 | 1           |
| ENSRNOG00000022141  | -0.247998273 | 0.092495713 | 0.007336158 | 0.433037411 | 3           |
| ENSRNOG00000029055  | -0.24739226  | 0.09218737  | 0.007283836 | 0.433037411 | 8           |
| ENSRNOG00000011825  | -0.247830914 | 0.092820681 | 0.007585199 | 0.441647432 | 9           |
| ENSRNOG00000014750  | -0.211782114 | 0.079293461 | 0.007565611 | 0.441647432 | 16          |

|                    |              |             |             |             |    |
|--------------------|--------------|-------------|-------------|-------------|----|
| ENSRNOG00000051964 | -0.424420059 | 0.158814246 | 0.007530394 | 0.441647432 | 2  |
| ENSRNOG00000009946 | 0.164636128  | 0.061727895 | 0.007650278 | 0.443654916 | 8  |
| ENSRNOG00000017146 | 0.204147232  | 0.076692376 | 0.007770158 | 0.447030736 | 18 |
| ENSRNOG00000020762 | -0.18469715  | 0.069378342 | 0.007763796 | 0.447030736 | 1  |
| ENSRNOG00000047505 | 0.274861581  | 0.103312183 | 0.007802581 | 0.447121787 | 9  |
| ENSRNOG00000012505 | -0.320073042 | 0.120664955 | 0.007987999 | 0.447802537 | 2  |
| ENSRNOG00000012928 | -0.313316523 | 0.118139968 | 0.007999783 | 0.447802537 | 19 |
| ENSRNOG00000016410 | 0.180336023  | 0.067934262 | 0.007941036 | 0.447802537 | 17 |
| ENSRNOG00000019834 | 0.143924742  | 0.05419396  | 0.0079136   | 0.447802537 | 9  |
| ENSRNOG00000042411 | 0.212324946  | 0.079869659 | 0.007851427 | 0.447802537 | 5  |
| ENSRNOG00000047280 | 0.533818784  | 0.201075882 | 0.007935248 | 0.447802537 | 1  |
| ENSRNOG00000011796 | 0.192814943  | 0.072854177 | 0.00813085  | 0.448761173 | 4  |
| ENSRNOG00000019264 | 0.185292145  | 0.069984968 | 0.008106557 | 0.448761173 | 4  |
| ENSRNOG00000020703 | 0.17935141   | 0.067712634 | 0.008079864 | 0.448761173 | 1  |
| ENSRNOG00000020853 | 0.170889574  | 0.064579798 | 0.008140722 | 0.448761173 | 8  |
| ENSRNOG00000005908 | -0.213328368 | 0.08069722  | 0.008203795 | 0.448824969 | 4  |
| ENSRNOG00000015589 | 0.234697323  | 0.08875105  | 0.008182486 | 0.448824969 | 4  |
| ENSRNOG00000058306 | -1.171359545 | 0.443838568 | 0.008311255 | 0.452994624 | 4  |
| ENSRNOG00000018395 | -0.192179068 | 0.07287943  | 0.008365633 | 0.45425073  | 9  |
| ENSRNOG00000050922 | -8.817507422 | 3.345484072 | 0.008397761 | 0.454293789 | 1  |
| ENSRNOG00000013167 | -0.167892366 | 0.064014469 | 0.008722958 | 0.466662163 | 16 |
| ENSRNOG00000014723 | 0.163737207  | 0.062423371 | 0.008715639 | 0.466662163 | 19 |
| ENSRNOG00000033389 | 0.237448341  | 0.090492525 | 0.008691519 | 0.466662163 | 20 |
| ENSRNOG00000014599 | -0.18438658  | 0.070755315 | 0.009161316 | 0.484847737 | 2  |
| ENSRNOG00000027722 | 0.219178516  | 0.084108439 | 0.009163214 | 0.484847737 | 4  |
| ENSRNOG00000028092 | -0.164233773 | 0.062997499 | 0.009134236 | 0.484847737 | 4  |
| ENSRNOG00000011448 | -0.239166492 | 0.091875617 | 0.009237012 | 0.486072134 | 16 |
| ENSRNOG00000014096 | -0.149114897 | 0.057295751 | 0.009253408 | 0.486072134 | 18 |
| ENSRNOG00000001172 | 0.155135105  | 0.059839925 | 0.009528073 | 0.486712319 | 12 |
| ENSRNOG00000006720 | 0.18745414   | 0.072198847 | 0.009421751 | 0.486712319 | 13 |
| ENSRNOG00000007971 | 0.194775439  | 0.075340128 | 0.009729953 | 0.486712319 | 10 |
| ENSRNOG00000007992 | -0.263745472 | 0.10172261  | 0.009520059 | 0.486712319 | 5  |
| ENSRNOG00000015508 | -0.210963579 | 0.081439453 | 0.009585483 | 0.486712319 | 13 |
| ENSRNOG00000018326 | 0.186109278  | 0.072125449 | 0.009869873 | 0.486712319 | 16 |
| ENSRNOG00000018351 | 0.206452114  | 0.079489526 | 0.009398058 | 0.486712319 | 9  |
| ENSRNOG00000018736 | 0.20172564   | 0.077583469 | 0.009319358 | 0.486712319 | 1  |
| ENSRNOG00000021174 | 0.176817349  | 0.06826569  | 0.009593832 | 0.486712319 | 1  |
| ENSRNOG00000043077 | 0.178685983  | 0.068851374 | 0.009452432 | 0.486712319 | 19 |
| ENSRNOG00000046314 | -3.713672544 | 1.438229201 | 0.009819699 | 0.486712319 | 20 |
| ENSRNOG00000048192 | -3.713672544 | 1.438229201 | 0.009819699 | 0.486712319 | 8  |
| ENSRNOG00000049560 | 0.143963021  | 0.055603843 | 0.009623162 | 0.486712319 | 13 |
| ENSRNOG00000049575 | 0.175254794  | 0.067911003 | 0.00986134  | 0.486712319 | 9  |
| ENSRNOG00000050867 | -3.713672544 | 1.438229201 | 0.009819699 | 0.486712319 | 5  |
| ENSRNOG00000055286 | 0.384361289  | 0.148939031 | 0.00986111  | 0.486712319 | 1  |
| ENSRNOG00000055972 | -3.713672544 | 1.438229201 | 0.009819699 | 0.486712319 | 1  |
| ENSRNOG00000058050 | -0.171619875 | 0.066395549 | 0.009743268 | 0.486712319 | 1  |
| ENSRNOG00000026458 | -0.326809791 | 0.126874707 | 0.009999498 | 0.491432953 | 11 |
| ENSRNOG00000006787 | 0.143344605  | 0.055846588 | 0.01026546  | 0.494596371 | 5  |
| ENSRNOG00000007648 | 0.160604676  | 0.062483908 | 0.010159974 | 0.494596371 | 7  |
| ENSRNOG00000007806 | 0.193397631  | 0.075674454 | 0.010598881 | 0.494596371 | 4  |

|                    |              |             |             |             |            |
|--------------------|--------------|-------------|-------------|-------------|------------|
| ENSRNOG00000009836 | -0.20680386  | 0.080545932 | 0.01024268  | 0.494596371 | 15         |
| ENSRNOG00000011148 | -0.174555156 | 0.067961779 | 0.010215998 | 0.494596371 | 2          |
| ENSRNOG00000013036 | 0.206048617  | 0.080419562 | 0.010402029 | 0.494596371 | 5          |
| ENSRNOG00000015145 | -0.220765218 | 0.086003489 | 0.010260235 | 0.494596371 | 3          |
| ENSRNOG00000015971 | -0.131476635 | 0.051454001 | 0.010611868 | 0.494596371 | 18         |
| ENSRNOG00000019587 | 0.174455149  | 0.068331631 | 0.010677932 | 0.494596371 | 9          |
| ENSRNOG00000020781 | -0.67122876  | 0.262312351 | 0.010500661 | 0.494596371 | 1          |
| ENSRNOG00000025715 | -0.228546393 | 0.089141014 | 0.01035109  | 0.494596371 | 3          |
| ENSRNOG00000026937 | -0.292552095 | 0.114566272 | 0.010662725 | 0.494596371 | 2          |
| ENSRNOG00000027079 | 0.46241496   | 0.180520711 | 0.01042027  | 0.494596371 | 5          |
| ENSRNOG00000028768 | -0.242700015 | 0.094935592 | 0.010574012 | 0.494596371 | 2          |
| ENSRNOG00000029360 | -0.173326636 | 0.06774945  | 0.010517094 | 0.494596371 | 20         |
| ENSRNOG00000048736 | 0.167173682  | 0.065479086 | 0.010677338 | 0.494596371 | 9          |
| ENSRNOG00000053301 | -0.212191685 | 0.082946356 | 0.01052217  | 0.494596371 | 11         |
| ENSRNOG00000057137 | -0.441310802 | 0.172716369 | 0.010615163 | 0.494596371 | 1          |
| ENSRNOG00000050240 | 0.54522746   | 0.213747614 | 0.010747591 | 0.496237514 | 5          |
| ENSRNOG00000014241 | 0.152887884  | 0.05997388  | 0.010795762 | 0.496879231 | 5          |
| ENSRNOG00000010593 | -0.219858283 | 0.086459048 | 0.010993097 | 0.504360518 | 5          |
| ENSRNOG00000006432 | -0.210937078 | 0.083144938 | 0.011181322 | 0.505233241 | 4          |
| ENSRNOG00000006949 | 0.169125674  | 0.066666978 | 0.011184743 | 0.505233241 | 10         |
| ENSRNOG00000029773 | -0.230505662 | 0.090788487 | 0.011119189 | 0.505233241 | 8          |
| ENSRNOG00000049203 | 0.191127667  | 0.075254258 | 0.011092893 | 0.505233241 | 4          |
| ENSRNOG00000057367 | 0.149740729  | 0.059026882 | 0.011186362 | 0.505233241 | 16         |
| ENSRNOG00000001682 | -0.190365393 | 0.075219815 | 0.011380666 | 0.510826299 | 11         |
| ENSRNOG00000053518 | -0.220330723 | 0.087024612 | 0.011347196 | 0.510826299 | 17         |
| ENSRNOG00000022320 | -0.531955745 | 0.210456141 | 0.011483454 | 0.513849128 | 16         |
| ENSRNOG00000053384 | 0.161343413  | 0.063884092 | 0.011551247 | 0.515292264 | 3          |
| ENSRNOG00000004061 | -0.226494873 | 0.089954112 | 0.011805901 | 0.515383796 | 6          |
| ENSRNOG00000013552 | 0.144270909  | 0.057511203 | 0.012122077 | 0.515383796 | 1          |
| ENSRNOG00000014233 | 0.186560045  | 0.07396981  | 0.0116653   | 0.515383796 | 10         |
| ENSRNOG00000015911 | 0.160584686  | 0.063717967 | 0.011727423 | 0.515383796 | 1          |
| ENSRNOG00000016655 | 0.169364596  | 0.067455749 | 0.012047461 | 0.515383796 | 9          |
| ENSRNOG00000016923 | 0.173279428  | 0.069006314 | 0.01203671  | 0.515383796 | 1          |
| ENSRNOG00000019688 | 0.187256515  | 0.074435849 | 0.011880418 | 0.515383796 | 18         |
| ENSRNOG00000020607 | 0.172868693  | 0.068602159 | 0.011739735 | 0.515383796 | 1          |
| ENSRNOG00000020684 | 0.184304134  | 0.07338364  | 0.012021408 | 0.515383796 | 10         |
| ENSRNOG00000023130 | -0.234619894 | 0.093139115 | 0.011767981 | 0.515383796 | 13         |
| ENSRNOG00000025497 | 0.185978374  | 0.07411302  | 0.012094032 | 0.515383796 | 7          |
| ENSRNOG00000029152 | -0.351300111 | 0.139797518 | 0.011973617 | 0.515383796 | 5          |
| ENSRNOG00000034037 | -0.162193771 | 0.064639743 | 0.01210064  | 0.515383796 | 8          |
| ENSRNOG00000049259 | -0.321182585 | 0.127611088 | 0.011839707 | 0.515383796 | 1          |
| ENSRNOG00000052512 | 0.535556492  | 0.212391252 | 0.011683699 | 0.515383796 | KL568458.1 |
| ENSRNOG00000060356 | -0.250037189 | 0.099291436 | 0.011795128 | 0.515383796 | 8          |
| ENSRNOG00000013322 | -0.275110202 | 0.110072815 | 0.012442227 | 0.517371404 | X          |
| ENSRNOG00000013802 | -0.251416474 | 0.100491856 | 0.012354305 | 0.517371404 | 8          |
| ENSRNOG00000020457 | 0.263958684  | 0.105565885 | 0.012404736 | 0.517371404 | 1          |
| ENSRNOG00000020479 | -0.165216691 | 0.066164313 | 0.012522546 | 0.517371404 | 1          |
| ENSRNOG00000021637 | -0.192885364 | 0.077215751 | 0.012489429 | 0.517371404 | 17         |
| ENSRNOG00000047984 | -0.311614406 | 0.124407794 | 0.012252688 | 0.517371404 | 8          |
| ENSRNOG00000049255 | -1.250068166 | 0.500300656 | 0.012467304 | 0.517371404 | 11         |

|                    |              |             |             |               |    |
|--------------------|--------------|-------------|-------------|---------------|----|
| ENSRNOG00000054901 | -0.226477933 | 0.090451966 | 0.012285096 | 0.517371404   | 3  |
| ENSRNOG00000055020 | -0.241625091 | 0.096713313 | 0.01247679  | 0.517371404 X |    |
| ENSRNOG00000056826 | -0.30469951  | 0.122027326 | 0.012525684 | 0.517371404   | 14 |
| ENSRNOG00000004839 | 0.222709152  | 0.08940148  | 0.012734376 | 0.523011293   | 7  |
| ENSRNOG00000019822 | 0.201011121  | 0.08066504  | 0.012705335 | 0.523011293   | 7  |
| ENSRNOG00000011251 | -0.257370103 | 0.10338237  | 0.012792399 | 0.523657618   | 8  |
| ENSRNOG00000020996 | 0.176264456  | 0.070826895 | 0.012822352 | 0.523657618   | 1  |
| ENSRNOG00000036701 | 0.131201185  | 0.052898088 | 0.013128541 | 0.531669256   | 10 |
| ENSRNOG00000049238 | -3.75536583  | 1.513049557 | 0.013065289 | 0.531669256   | 10 |
| ENSRNOG00000055096 | -0.305648076 | 0.123219992 | 0.013119562 | 0.531669256   | 1  |
| ENSRNOG00000000035 | -0.330695373 | 0.134308034 | 0.013808153 | 0.53250884    | 14 |
| ENSRNOG00000001377 | 0.179474477  | 0.072577741 | 0.013403724 | 0.53250884    | 12 |
| ENSRNOG00000002389 | -0.150516504 | 0.061230241 | 0.013963332 | 0.53250884 X  |    |
| ENSRNOG00000002875 | -0.251122182 | 0.101753292 | 0.013588876 | 0.53250884    | 13 |
| ENSRNOG00000004968 | -0.232905515 | 0.094855959 | 0.014074361 | 0.53250884    | 6  |
| ENSRNOG00000006717 | -0.226800227 | 0.092260162 | 0.013960885 | 0.53250884    | 4  |
| ENSRNOG00000007128 | -0.170025137 | 0.068937405 | 0.013649033 | 0.53250884    | 3  |
| ENSRNOG00000008331 | -0.189130507 | 0.076963281 | 0.0139942   | 0.53250884    | 7  |
| ENSRNOG00000008652 | -0.216346623 | 0.087587287 | 0.013508708 | 0.53250884    | 8  |
| ENSRNOG00000009057 | -0.192123111 | 0.077999101 | 0.013772413 | 0.53250884    | 2  |
| ENSRNOG00000009689 | -0.170662387 | 0.069054039 | 0.0134573   | 0.53250884    | 3  |
| ENSRNOG00000012558 | -0.160041407 | 0.06477291  | 0.013480827 | 0.53250884    | 9  |
| ENSRNOG00000013493 | -0.206094317 | 0.083439999 | 0.013512428 | 0.53250884    | 8  |
| ENSRNOG00000015753 | 0.158198483  | 0.064348283 | 0.013952946 | 0.53250884    | 1  |
| ENSRNOG00000016255 | 0.266277192  | 0.107652819 | 0.013380395 | 0.53250884    | 4  |
| ENSRNOG00000017506 | 0.210365446  | 0.08556008  | 0.013944618 | 0.53250884    | 17 |
| ENSRNOG00000019875 | -0.170715002 | 0.06900338  | 0.013360623 | 0.53250884    | 18 |
| ENSRNOG00000020701 | -0.243126785 | 0.09887078  | 0.013931074 | 0.53250884    | 10 |
| ENSRNOG00000032414 | -0.375744652 | 0.151807519 | 0.013318447 | 0.53250884    | 2  |
| ENSRNOG00000038001 | 0.187123318  | 0.075962947 | 0.013764551 | 0.53250884    | 11 |
| ENSRNOG00000039183 | -0.397305697 | 0.161141647 | 0.013679619 | 0.53250884    | 11 |
| ENSRNOG00000045569 | -0.248790874 | 0.101044443 | 0.013809051 | 0.53250884    | 17 |
| ENSRNOG00000047651 | 5.167459735  | 2.105216897 | 0.014104248 | 0.53250884    | 1  |
| ENSRNOG00000051867 | -0.227345559 | 0.092362233 | 0.013837443 | 0.53250884    | 11 |
| ENSRNOG00000053060 | -0.213189265 | 0.086262289 | 0.013458237 | 0.53250884    | 7  |
| ENSRNOG00000057754 | -0.168567634 | 0.068644529 | 0.014062608 | 0.53250884    | 8  |
| ENSRNOG00000001815 | -0.168818172 | 0.068833896 | 0.014184996 | 0.534166413   | 11 |
| ENSRNOG00000001317 | -0.165495748 | 0.067545775 | 0.014280571 | 0.534444892   | 12 |
| ENSRNOG00000019698 | 0.170623621  | 0.0697217   | 0.014396705 | 0.534444892   | 16 |
| ENSRNOG00000027360 | -0.200259425 | 0.081833568 | 0.01439889  | 0.534444892   | 6  |
| ENSRNOG00000051480 | -0.173031937 | 0.070718002 | 0.014413571 | 0.534444892   | 2  |
| ENSRNOG00000059827 | -3.4853598   | 1.423186776 | 0.014326033 | 0.534444892   | 10 |
| ENSRNOG00000060479 | -0.167330668 | 0.06837716  | 0.014398214 | 0.534444892   | 3  |
| ENSRNOG00000012655 | -0.551595243 | 0.225539847 | 0.014458468 | 0.534742022   | 2  |
| ENSRNOG00000008831 | 0.183360897  | 0.07502102  | 0.014520316 | 0.535662937   | 7  |
| ENSRNOG00000007033 | 0.179247939  | 0.073398385 | 0.014601141 | 0.535759624   | 14 |
| ENSRNOG00000008055 | -0.302677842 | 0.124027645 | 0.014670753 | 0.535759624   | 5  |
| ENSRNOG00000012087 | -0.195058739 | 0.079902692 | 0.014638399 | 0.535759624   | 16 |
| ENSRNOG00000037505 | 0.154335594  | 0.06322385  | 0.014642693 | 0.535759624   | 12 |
| ENSRNOG00000023383 | -0.132748655 | 0.05442068  | 0.014715529 | 0.536044567 X |    |

|                    |              |             |             |               |    |
|--------------------|--------------|-------------|-------------|---------------|----|
| ENSRNOG00000017752 | -0.155307818 | 0.06374901  | 0.01484088  | 0.539255819   | 2  |
| ENSRNOG00000015205 | -0.184299059 | 0.075696814 | 0.014904127 | 0.540200075   | 18 |
| ENSRNOG00000027098 | 0.144726555  | 0.059516693 | 0.01502828  | 0.543289293   | 1  |
| ENSRNOG00000036676 | 0.151547214  | 0.062362684 | 0.015094887 | 0.543289293   | 10 |
| ENSRNOG00000058973 | -0.207803808 | 0.085518467 | 0.015101779 | 0.543289293   | 6  |
| ENSRNOG00000000075 | -0.250540081 | 0.103195357 | 0.015189746 | 0.5439051     | 14 |
| ENSRNOG00000005130 | 0.169344635  | 0.069754502 | 0.015193928 | 0.5439051     | 14 |
| ENSRNOG00000057623 | -0.158162001 | 0.065206589 | 0.015285107 | 0.545821376   | 1  |
| ENSRNOG00000010748 | -0.324681913 | 0.134093687 | 0.015464832 | 0.546056172   | 16 |
| ENSRNOG00000017113 | -0.222078821 | 0.091623817 | 0.015358594 | 0.546056172   | 13 |
| ENSRNOG00000022980 | -0.193239426 | 0.079751618 | 0.015392259 | 0.546056172   | 8  |
| ENSRNOG00000031269 | 0.163593118  | 0.067544515 | 0.01543516  | 0.546056172   | 7  |
| ENSRNOG00000033335 | -0.361497857 | 0.149320658 | 0.015480003 | 0.546056172 X |    |
| ENSRNOG00000019850 | -2.370585151 | 0.980079741 | 0.015573185 | 0.548009794   | 9  |
| ENSRNOG00000000054 | 0.193724285  | 0.080437856 | 0.016023842 | 0.549375587   | 16 |
| ENSRNOG00000000847 | 0.186464141  | 0.077245053 | 0.015781499 | 0.549375587   | 20 |
| ENSRNOG00000001091 | 0.17312204   | 0.071793837 | 0.015892392 | 0.549375587   | 12 |
| ENSRNOG00000001115 | 0.147832149  | 0.061335536 | 0.015942894 | 0.549375587   | 12 |
| ENSRNOG00000002021 | -0.17906087  | 0.074244276 | 0.015874852 | 0.549375587   | 11 |
| ENSRNOG00000002360 | -0.186110529 | 0.077025737 | 0.015682917 | 0.549375587   | 14 |
| ENSRNOG00000010727 | 0.183183037  | 0.076073969 | 0.01604196  | 0.549375587   | 5  |
| ENSRNOG00000011933 | 0.196664652  | 0.081700923 | 0.016078494 | 0.549375587   | 19 |
| ENSRNOG00000013738 | -0.334563666 | 0.138488876 | 0.015699986 | 0.549375587   | 18 |
| ENSRNOG00000015332 | -0.34150465  | 0.141907134 | 0.016104609 | 0.549375587   | 18 |
| ENSRNOG00000018153 | -0.168798354 | 0.06997773  | 0.015857779 | 0.549375587   | 8  |
| ENSRNOG00000020346 | 0.178090405  | 0.073788437 | 0.015798945 | 0.549375587   | 1  |
| ENSRNOG00000051528 | -0.177872625 | 0.073889342 | 0.01607167  | 0.549375587   | 9  |
| ENSRNOG00000019175 | -0.185955868 | 0.077326128 | 0.016180176 | 0.550657732   | 17 |
| ENSRNOG00000053047 | -0.163722892 | 0.068133982 | 0.01626319  | 0.552186715   | 10 |
| ENSRNOG00000001613 | -0.211429028 | 0.088093515 | 0.016392737 | 0.552702102   | 11 |
| ENSRNOG00000048118 | 0.709968694  | 0.295788507 | 0.016383525 | 0.552702102   | 2  |
| ENSRNOG00000048982 | 0.900772288  | 0.375214376 | 0.016364325 | 0.552702102   | 7  |
| ENSRNOG00000015297 | 0.166173956  | 0.069351194 | 0.016569551 | 0.555844047   | 9  |
| ENSRNOG00000015425 | -0.195178992 | 0.081568157 | 0.016718841 | 0.555844047   | 2  |
| ENSRNOG00000018691 | -0.160514967 | 0.067086775 | 0.016727328 | 0.555844047   | 5  |
| ENSRNOG00000020434 | 0.19386144   | 0.080996052 | 0.016689948 | 0.555844047   | 1  |
| ENSRNOG00000026502 | -0.44586251  | 0.186393032 | 0.0167543   | 0.555844047   | 7  |
| ENSRNOG00000050071 | -0.305548381 | 0.127637424 | 0.016671308 | 0.555844047   | 11 |
| ENSRNOG00000050482 | -0.29275567  | 0.122155171 | 0.016548499 | 0.555844047   | 4  |
| ENSRNOG00000001440 | 0.151464302  | 0.063427471 | 0.016940705 | 0.557326782   | 12 |
| ENSRNOG00000001642 | -0.212587371 | 0.089033228 | 0.01695276  | 0.557326782   | 11 |
| ENSRNOG00000003463 | 0.138666458  | 0.058037835 | 0.016883157 | 0.557326782   | 10 |
| ENSRNOG00000011135 | -0.29831541  | 0.124813877 | 0.016844608 | 0.557326782   | 2  |
| ENSRNOG00000011627 | -0.16506432  | 0.069173574 | 0.017021926 | 0.558334576   | 2  |
| ENSRNOG00000019476 | 0.154801909  | 0.06493708  | 0.017131401 | 0.560656989   | 9  |
| ENSRNOG00000005710 | -0.282711154 | 0.118790948 | 0.017317109 | 0.562922519   | 8  |
| ENSRNOG00000011621 | -0.187117029 | 0.078612035 | 0.017300459 | 0.562922519   | 15 |
| ENSRNOG00000018566 | -0.16911053  | 0.071042189 | 0.017292729 | 0.562922519   | 17 |
| ENSRNOG00000004232 | -0.249715091 | 0.104965016 | 0.017358187 | 0.562995522   | 6  |
| ENSRNOG00000010210 | -0.23399078  | 0.098439436 | 0.017453972 | 0.563824042   | 2  |

|                    |              |             |             |               |    |
|--------------------|--------------|-------------|-------------|---------------|----|
| ENSRNOG00000012100 | -0.24612255  | 0.103550186 | 0.017461512 | 0.563824042   | 4  |
| ENSRNOG00000020624 | -0.183663399 | 0.077316627 | 0.017526574 | 0.564667273   | 1  |
| ENSRNOG00000005877 | -0.18775988  | 0.079073137 | 0.017572304 | 0.564885296   | 6  |
| ENSRNOG00000038916 | -0.137490396 | 0.057932068 | 0.017629757 | 0.565478353   | 7  |
| ENSRNOG00000005309 | -0.250529367 | 0.105760364 | 0.017843977 | 0.569593053   | 7  |
| ENSRNOG00000012641 | -0.192739999 | 0.081425353 | 0.01792925  | 0.569593053   | 1  |
| ENSRNOG00000016454 | -0.210709759 | 0.089097344 | 0.018033054 | 0.569593053   | 5  |
| ENSRNOG00000016707 | -0.168636461 | 0.071221446 | 0.017895346 | 0.569593053   | 4  |
| ENSRNOG00000029592 | -0.165293853 | 0.069874566 | 0.01800187  | 0.569593053   | 2  |
| ENSRNOG00000038933 | -0.168771073 | 0.071348401 | 0.018008176 | 0.569593053   | 16 |
| ENSRNOG00000056246 | -0.168043568 | 0.071023437 | 0.017979997 | 0.569593053   | 9  |
| ENSRNOG00000000571 | 0.129282418  | 0.05499076  | 0.018723819 | 0.570289766   | 20 |
| ENSRNOG00000000974 | 0.165397596  | 0.070321978 | 0.018672559 | 0.570289766   | 12 |
| ENSRNOG00000003346 | -0.427333057 | 0.181340854 | 0.018447154 | 0.570289766 X |    |
| ENSRNOG00000004921 | -0.179832109 | 0.076200936 | 0.018276292 | 0.570289766   | 3  |
| ENSRNOG00000006642 | -0.178536723 | 0.075673611 | 0.018309466 | 0.570289766 X |    |
| ENSRNOG00000007739 | -0.193360667 | 0.082242697 | 0.018718087 | 0.570289766   | 10 |
| ENSRNOG00000009006 | -0.1468669   | 0.062335663 | 0.018469664 | 0.570289766   | 10 |
| ENSRNOG00000009712 | 0.190467312  | 0.080771747 | 0.018369078 | 0.570289766   | 5  |
| ENSRNOG00000009856 | -0.184153413 | 0.078161813 | 0.018470257 | 0.570289766   | 6  |
| ENSRNOG00000009894 | -0.200146556 | 0.084750831 | 0.018196846 | 0.570289766   | 4  |
| ENSRNOG00000013076 | 0.171199372  | 0.072792862 | 0.018679286 | 0.570289766   | 7  |
| ENSRNOG00000017820 | -0.408578761 | 0.173226025 | 0.018341774 | 0.570289766   | 17 |
| ENSRNOG00000019968 | 0.168616255  | 0.071646188 | 0.018599736 | 0.570289766   | 1  |
| ENSRNOG00000039658 | 0.364676755  | 0.154554844 | 0.018298113 | 0.570289766   | 20 |
| ENSRNOG00000049604 | 0.271433207  | 0.114835273 | 0.018094702 | 0.570289766   | 12 |
| ENSRNOG00000060337 | -0.271367736 | 0.115343648 | 0.018638214 | 0.570289766   | 8  |
| ENSRNOG00000060585 | -4.203173104 | 1.786607632 | 0.018642677 | 0.570289766   | 3  |
| ENSRNOG00000019708 | 0.155932532  | 0.066350674 | 0.01876699  | 0.57040634    | 1  |
| ENSRNOG00000010239 | -0.141651666 | 0.060329017 | 0.018875249 | 0.571301372   | 4  |
| ENSRNOG00000011451 | 0.186690221  | 0.079491938 | 0.018847032 | 0.571301372   | 1  |
| ENSRNOG00000016448 | 0.163783662  | 0.069853523 | 0.019043779 | 0.572814734   | 1  |
| ENSRNOG00000036942 | 0.220487561  | 0.09402192  | 0.019023737 | 0.572814734   | 5  |
| ENSRNOG00000049743 | -0.285643566 | 0.121770755 | 0.018988916 | 0.572814734   | 2  |
| ENSRNOG00000014674 | -0.249351497 | 0.10646825  | 0.019179337 | 0.572889012   | 2  |
| ENSRNOG00000020248 | 0.149598295  | 0.063832835 | 0.019098911 | 0.572889012   | 1  |
| ENSRNOG00000026267 | -0.172368369 | 0.073574686 | 0.019141317 | 0.572889012 X |    |
| ENSRNOG00000028103 | 0.167156574  | 0.071389519 | 0.019207857 | 0.572889012   | 10 |
| ENSRNOG00000057622 | -0.237964682 | 0.101660692 | 0.019243823 | 0.572889012 X |    |
| ENSRNOG00000025443 | 0.169270389  | 0.07233969  | 0.019286942 | 0.572996077   | 3  |
| ENSRNOG00000032840 | -0.224614555 | 0.096158973 | 0.019498184 | 0.577474555   | 5  |
| ENSRNOG00000058478 | 0.151701185  | 0.064954497 | 0.019517349 | 0.577474555   | 3  |
| ENSRNOG00000000633 | 0.419666824  | 0.179801227 | 0.019592589 | 0.578520062   | 20 |
| ENSRNOG00000009339 | -0.23321058  | 0.10006133  | 0.01977043  | 0.582584749   | 2  |
| ENSRNOG00000003267 | 0.178942669  | 0.077145551 | 0.02036544  | 0.586368045   | 13 |
| ENSRNOG00000003712 | -0.157992438 | 0.068107464 | 0.020354287 | 0.586368045   | 14 |
| ENSRNOG00000012037 | -0.154233941 | 0.066401323 | 0.020192369 | 0.586368045   | 16 |
| ENSRNOG00000013055 | -0.24974369  | 0.107501681 | 0.020170517 | 0.586368045   | 2  |
| ENSRNOG00000013714 | -0.228748233 | 0.098491818 | 0.02020549  | 0.586368045   | 18 |
| ENSRNOG00000015423 | -0.202141652 | 0.087106436 | 0.020306919 | 0.586368045   | 2  |

|                     |              |             |             |               |    |
|---------------------|--------------|-------------|-------------|---------------|----|
| ENSRNOG00000015840  | -0.15164671  | 0.06534458  | 0.020301765 | 0.586368045   | 18 |
| ENSRNOG00000018936  | -0.236119939 | 0.101810912 | 0.020384156 | 0.586368045   | 1  |
| ENSRNOG00000019433  | 0.252127901  | 0.108512538 | 0.020152793 | 0.586368045   | 16 |
| ENSRNOG00000024372  | -0.240906169 | 0.103612355 | 0.020068119 | 0.586368045   | 6  |
| ENSRNOG00000055093  | -0.269286064 | 0.115950409 | 0.020210092 | 0.586368045   | 1  |
| ENSRNOG00000060617  | -0.210749903 | 0.09066198  | 0.020095092 | 0.586368045 Y |    |
| ENSRNOG00000000991  | 0.192354996  | 0.083002987 | 0.020479412 | 0.587941616   | 12 |
| ENSRNOG00000000164  | -0.181430068 | 0.079489099 | 0.022462658 | 0.589092369 X |    |
| ENSRNOG00000000431  | 0.165936992  | 0.072268613 | 0.021669349 | 0.589092369   | 20 |
| ENSRNOG00000000867  | 0.143496114  | 0.062524193 | 0.02173029  | 0.589092369   | 20 |
| ENSRNOG000000003144 | 0.153830844  | 0.067520059 | 0.022708804 | 0.589092369   | 10 |
| ENSRNOG000000003177 | -0.222090296 | 0.097182461 | 0.022295714 | 0.589092369   | 10 |
| ENSRNOG000000003388 | -0.170568538 | 0.075181171 | 0.023282517 | 0.589092369   | 13 |
| ENSRNOG000000003649 | 0.153167645  | 0.066181883 | 0.02064886  | 0.589092369   | 13 |
| ENSRNOG000000003825 | -0.18125661  | 0.079596637 | 0.022774923 | 0.589092369   | 9  |
| ENSRNOG000000006082 | -0.42162526  | 0.184760992 | 0.022489124 | 0.589092369   | 6  |
| ENSRNOG000000006197 | -0.131058556 | 0.057128218 | 0.02178404  | 0.589092369   | 4  |
| ENSRNOG000000006833 | -0.162380827 | 0.070912796 | 0.022029064 | 0.589092369   | 5  |
| ENSRNOG000000007400 | 0.142008296  | 0.062146974 | 0.022310507 | 0.589092369   | 7  |
| ENSRNOG000000007793 | 0.208268619  | 0.090909168 | 0.021966139 | 0.589092369   | 5  |
| ENSRNOG000000007804 | -0.15126672  | 0.066404013 | 0.022728033 | 0.589092369   | 4  |
| ENSRNOG000000007989 | 0.228817762  | 0.100806367 | 0.023215223 | 0.589092369   | 3  |
| ENSRNOG000000008393 | -0.149382797 | 0.06523679  | 0.022029718 | 0.589092369   | 4  |
| ENSRNOG000000008411 | -0.165007003 | 0.071743085 | 0.021449873 | 0.589092369   | 3  |
| ENSRNOG000000009421 | 0.16831971   | 0.073645174 | 0.022280613 | 0.589092369   | 3  |
| ENSRNOG000000009754 | -0.192577045 | 0.083875993 | 0.021677405 | 0.589092369   | 6  |
| ENSRNOG000000009760 | 0.193602424  | 0.085042161 | 0.022813328 | 0.589092369   | 7  |
| ENSRNOG000000009891 | -0.195071183 | 0.085765407 | 0.022937506 | 0.589092369   | 1  |
| ENSRNOG00000010137  | -0.186740684 | 0.080888878 | 0.020965362 | 0.589092369   | 15 |
| ENSRNOG00000010452  | -0.205359465 | 0.090506682 | 0.023268458 | 0.589092369   | 4  |
| ENSRNOG00000010633  | 0.122007363  | 0.053191941 | 0.021806648 | 0.589092369   | 16 |
| ENSRNOG00000010756  | 0.207618624  | 0.090855147 | 0.022303398 | 0.589092369   | 10 |
| ENSRNOG00000010852  | -0.177524756 | 0.077044345 | 0.021212019 | 0.589092369   | 4  |
| ENSRNOG00000011592  | 0.174734421  | 0.075990779 | 0.021481323 | 0.589092369   | 15 |
| ENSRNOG00000011622  | -0.175540747 | 0.075949698 | 0.020817591 | 0.589092369   | 1  |
| ENSRNOG00000011814  | -0.160282368 | 0.069491232 | 0.021082035 | 0.589092369   | 4  |
| ENSRNOG00000011841  | 0.536900422  | 0.23463414  | 0.022123252 | 0.589092369   | 9  |
| ENSRNOG00000012357  | 0.178390002  | 0.077249742 | 0.02092897  | 0.589092369   | 1  |
| ENSRNOG00000013121  | -0.203479216 | 0.089501679 | 0.022997983 | 0.589092369   | 2  |
| ENSRNOG00000013438  | -0.231805047 | 0.100513867 | 0.021099478 | 0.589092369   | 17 |
| ENSRNOG00000015230  | -0.246214157 | 0.10726206  | 0.021707637 | 0.589092369   | 1  |
| ENSRNOG00000015696  | -0.220272524 | 0.096005673 | 0.021769262 | 0.589092369   | 3  |
| ENSRNOG00000015734  | -0.158515322 | 0.068800557 | 0.021223592 | 0.589092369   | 1  |
| ENSRNOG00000016391  | -0.185517682 | 0.080497234 | 0.02118637  | 0.589092369   | 17 |
| ENSRNOG00000017235  | 0.148028704  | 0.064642371 | 0.022023404 | 0.589092369   | 19 |
| ENSRNOG00000018057  | 0.18817781   | 0.08192408  | 0.021620025 | 0.589092369   | 9  |
| ENSRNOG00000019353  | -0.174789933 | 0.075761835 | 0.021049391 | 0.589092369   | 19 |
| ENSRNOG00000019426  | -0.434704226 | 0.191478931 | 0.023192678 | 0.589092369   | 1  |
| ENSRNOG00000019464  | -0.192675662 | 0.084534875 | 0.022652526 | 0.589092369   | 1  |
| ENSRNOG00000019491  | 0.164473864  | 0.071230491 | 0.020941508 | 0.589092369   | 1  |

|                    |              |             |             |               |    |
|--------------------|--------------|-------------|-------------|---------------|----|
| ENSRNOG00000020102 | 0.165255878  | 0.072554173 | 0.022745084 | 0.589092369   | 1  |
| ENSRNOG00000021380 | 0.144039057  | 0.063428794 | 0.023154359 | 0.589092369   | 10 |
| ENSRNOG00000023816 | 0.160452763  | 0.069702891 | 0.021337835 | 0.589092369   | 2  |
| ENSRNOG00000025580 | 0.136301168  | 0.059969938 | 0.023036733 | 0.589092369   | 3  |
| ENSRNOG00000025848 | -0.430772388 | 0.188512997 | 0.022306549 | 0.589092369   | 4  |
| ENSRNOG00000028235 | 4.905706631  | 2.142887184 | 0.022062063 | 0.589092369   | 4  |
| ENSRNOG00000028941 | 0.215652117  | 0.094789741 | 0.022902478 | 0.589092369   | 2  |
| ENSRNOG00000030888 | 0.178917019  | 0.077841581 | 0.021534703 | 0.589092369   | 1  |
| ENSRNOG00000031085 | 0.154287449  | 0.06698654  | 0.021264193 | 0.589092369   | 3  |
| ENSRNOG00000032156 | -0.190655595 | 0.083935808 | 0.023120037 | 0.589092369   | 4  |
| ENSRNOG00000032828 | 0.153274759  | 0.066565351 | 0.021300191 | 0.589092369   | 7  |
| ENSRNOG00000036688 | 0.134206944  | 0.059055819 | 0.023053678 | 0.589092369   | 10 |
| ENSRNOG00000045965 | -0.980494879 | 0.427174877 | 0.021715886 | 0.589092369   | 10 |
| ENSRNOG00000047113 | 1.100326871  | 0.481048056 | 0.022175208 | 0.589092369   | 9  |
| ENSRNOG00000047319 | -0.41243341  | 0.179626466 | 0.021672366 | 0.589092369   | 4  |
| ENSRNOG00000047513 | -0.202054216 | 0.088740599 | 0.022791695 | 0.589092369   | 5  |
| ENSRNOG00000050562 | -0.265353413 | 0.116262338 | 0.022467637 | 0.589092369 X |    |
| ENSRNOG00000050843 | -0.164960322 | 0.072418341 | 0.022733703 | 0.589092369   | 9  |
| ENSRNOG00000052959 | -0.26363056  | 0.115518302 | 0.022480248 | 0.589092369   | 17 |
| ENSRNOG00000055305 | 0.59469418   | 0.259836674 | 0.02209545  | 0.589092369   | 7  |
| ENSRNOG00000056962 | -0.379560266 | 0.165681937 | 0.021969367 | 0.589092369   | 4  |
| ENSRNOG00000059276 | -0.265573763 | 0.116064583 | 0.022128493 | 0.589092369   | 13 |
| ENSRNOG00000060974 | -0.435568804 | 0.191438022 | 0.022891111 | 0.589092369   | 6  |
| ENSRNOG00000062045 | -0.322542304 | 0.141108472 | 0.02226739  | 0.589092369   | 12 |
| ENSRNOG00000062170 | -0.183881738 | 0.080164822 | 0.021802227 | 0.589092369   | 7  |
| ENSRNOG00000048282 | 0.147780244  | 0.065174006 | 0.023361398 | 0.590058443   | 9  |
| ENSRNOG00000019428 | -0.212279877 | 0.093647798 | 0.023403068 | 0.590082923   | 8  |
| ENSRNOG00000000560 | 0.335060909  | 0.14818026  | 0.02374867  | 0.590643177   | 20 |
| ENSRNOG00000002874 | -0.269699531 | 0.119269549 | 0.023743125 | 0.590643177   | 6  |
| ENSRNOG00000005377 | 0.238491796  | 0.105474604 | 0.023751205 | 0.590643177   | 10 |
| ENSRNOG00000013178 | 0.165295927  | 0.073076885 | 0.023700775 | 0.590643177   | 19 |
| ENSRNOG00000018391 | 0.173573342  | 0.076620129 | 0.023489663 | 0.590643177   | 1  |
| ENSRNOG00000020488 | -0.227913838 | 0.100748217 | 0.023684301 | 0.590643177   | 10 |
| ENSRNOG00000036913 | -0.173417538 | 0.076691268 | 0.023744258 | 0.590643177   | 4  |
| ENSRNOG00000061857 | -0.277621024 | 0.122748353 | 0.023715404 | 0.590643177   | 2  |
| ENSRNOG00000045918 | 0.165429459  | 0.073223607 | 0.023868666 | 0.592547802   | 17 |
| ENSRNOG00000019575 | 0.250965164  | 0.111179367 | 0.023989347 | 0.594525722   | 18 |
| ENSRNOG00000018276 | -0.12614458  | 0.05593231  | 0.024114011 | 0.596595445   | 9  |
| ENSRNOG00000050800 | -0.18272746  | 0.081066517 | 0.024193428 | 0.59754058    | 14 |
| ENSRNOG00000003472 | -0.180986275 | 0.080365089 | 0.024319053 | 0.5976684 X   |    |
| ENSRNOG00000007603 | -0.276350384 | 0.122713318 | 0.024322276 | 0.5976684     | 5  |
| ENSRNOG00000022343 | -0.209837647 | 0.09314929  | 0.024277907 | 0.5976684     | 4  |
| ENSRNOG00000005376 | -0.220372052 | 0.0979462   | 0.024453417 | 0.598894733   | 4  |
| ENSRNOG00000020773 | 0.163378723  | 0.072615742 | 0.024454799 | 0.598894733   | 1  |
| ENSRNOG00000010084 | -0.16258434  | 0.072339021 | 0.024605982 | 0.601081028   | 2  |
| ENSRNOG00000023591 | -0.29649161  | 0.131938003 | 0.024626992 | 0.601081028   | 6  |
| ENSRNOG00000000236 | -0.164518869 | 0.073246596 | 0.024697876 | 0.601647503   | 10 |
| ENSRNOG00000000632 | -0.193370163 | 0.086409807 | 0.025232366 | 0.601647503   | 20 |
| ENSRNOG00000001449 | 0.141896167  | 0.063215302 | 0.024790672 | 0.601647503   | 12 |
| ENSRNOG00000003235 | 0.150346018  | 0.067383449 | 0.025667818 | 0.601647503   | 10 |

|                    |              |             |             |             |    |    |
|--------------------|--------------|-------------|-------------|-------------|----|----|
| ENSRNOG00000005135 | -0.252321425 | 0.112674343 | 0.025130766 | 0.601647503 | X  |    |
| ENSRNOG00000006350 | 0.131647726  | 0.058799123 | 0.025159803 | 0.601647503 |    | 7  |
| ENSRNOG00000006513 | 0.268011485  | 0.11984445  | 0.025330302 | 0.601647503 |    | 10 |
| ENSRNOG00000008401 | 0.142440612  | 0.063547859 | 0.024995654 | 0.601647503 |    | 7  |
| ENSRNOG00000009207 | 0.187290524  | 0.083501823 | 0.024899954 | 0.601647503 |    | 3  |
| ENSRNOG00000009549 | -0.14894479  | 0.06642555  | 0.024943176 | 0.601647503 |    | 3  |
| ENSRNOG00000011360 | -0.294720184 | 0.132081609 | 0.025658011 | 0.601647503 |    | 2  |
| ENSRNOG00000012472 | -0.213429684 | 0.095439782 | 0.025333704 | 0.601647503 |    | 4  |
| ENSRNOG00000016334 | -0.197898932 | 0.088324324 | 0.025052399 | 0.601647503 |    | 5  |
| ENSRNOG00000016587 | 0.20327985   | 0.090923443 | 0.025369764 | 0.601647503 |    | 17 |
| ENSRNOG00000016795 | 0.141718972  | 0.063220479 | 0.024983199 | 0.601647503 |    | 3  |
| ENSRNOG00000020412 | 0.133876838  | 0.059960435 | 0.025565242 | 0.601647503 |    | 1  |
| ENSRNOG00000020951 | 4.087774803  | 1.824909002 | 0.025091683 | 0.601647503 |    | 10 |
| ENSRNOG00000021412 | -0.31198837  | 0.139848576 | 0.025687668 | 0.601647503 |    | 10 |
| ENSRNOG00000025551 | -0.181514012 | 0.081350295 | 0.025663624 | 0.601647503 |    | 7  |
| ENSRNOG00000031406 | -0.487983337 | 0.218404258 | 0.025462526 | 0.601647503 |    | 2  |
| ENSRNOG00000042682 | -0.156846271 | 0.070159102 | 0.02537931  | 0.601647503 |    | 18 |
| ENSRNOG00000046007 | 0.147953355  | 0.06595195  | 0.024874207 | 0.601647503 |    | 12 |
| ENSRNOG00000052963 | -0.156369095 | 0.069667238 | 0.024799345 | 0.601647503 |    | 13 |
| ENSRNOG00000056837 | 0.154502362  | 0.06912495  | 0.025409657 | 0.601647503 |    | 10 |
| ENSRNOG00000059010 | -0.340954778 | 0.15271092  | 0.025569984 | 0.601647503 |    | 14 |
| ENSRNOG00000027152 | -0.216418903 | 0.097052856 | 0.025753576 | 0.602218303 |    | 14 |
| ENSRNOG00000001548 | -0.146002151 | 0.065532488 | 0.025884823 | 0.602372662 |    | 3  |
| ENSRNOG00000027042 | -0.277024318 | 0.124332648 | 0.02587452  | 0.602372662 |    | 6  |
| ENSRNOG00000031033 | -0.135154797 | 0.060632339 | 0.025808075 | 0.602372662 | MT |    |
| ENSRNOG00000007377 | 0.144621348  | 0.06498261  | 0.02604506  | 0.604162042 |    | 10 |
| ENSRNOG00000017784 | -0.227274564 | 0.102119958 | 0.026043359 | 0.604162042 |    | 2  |
| ENSRNOG00000002840 | 0.132189947  | 0.059620617 | 0.026610441 | 0.605104899 |    | 7  |
| ENSRNOG00000004195 | -0.23423452  | 0.105541126 | 0.026461749 | 0.605104899 |    | 13 |
| ENSRNOG00000005087 | -0.168407417 | 0.07575227  | 0.026206791 | 0.605104899 |    | 6  |
| ENSRNOG00000007051 | -0.193455239 | 0.087195054 | 0.026510598 | 0.605104899 |    | 5  |
| ENSRNOG00000007133 | 0.137947403  | 0.062208443 | 0.026588745 | 0.605104899 |    | 7  |
| ENSRNOG00000015844 | 0.166460549  | 0.075148244 | 0.0267535   | 0.605104899 |    | 1  |
| ENSRNOG00000020191 | 0.172962425  | 0.077932134 | 0.026459657 | 0.605104899 |    | 1  |
| ENSRNOG00000022499 | -0.234150911 | 0.105623464 | 0.026633644 | 0.605104899 |    | 9  |
| ENSRNOG00000024934 | -0.194788369 | 0.087899131 | 0.026688468 | 0.605104899 |    | 8  |
| ENSRNOG00000025285 | -0.18756864  | 0.084587745 | 0.026592723 | 0.605104899 |    | 2  |
| ENSRNOG00000025832 | 0.153055915  | 0.069095201 | 0.026750086 | 0.605104899 |    | 3  |
| ENSRNOG00000026005 | 0.179960244  | 0.081116258 | 0.026517547 | 0.605104899 |    | 1  |
| ENSRNOG00000031127 | -0.178736812 | 0.080457104 | 0.026315975 | 0.605104899 |    | 8  |
| ENSRNOG00000042309 | -0.270091058 | 0.121664701 | 0.026421323 | 0.605104899 |    | 1  |
| ENSRNOG00000043364 | 0.272180535  | 0.12243225  | 0.026208287 | 0.605104899 |    | 5  |
| ENSRNOG00000056462 | -0.149402649 | 0.067367103 | 0.026572636 | 0.605104899 |    | 4  |
| ENSRNOG00000059764 | 0.127820269  | 0.057739148 | 0.026845708 | 0.606244671 |    | 1  |
| ENSRNOG00000017604 | 0.179790606  | 0.08126368  | 0.026936625 | 0.607151449 |    | 19 |
| ENSRNOG00000020358 | 0.146304279  | 0.066142453 | 0.026969619 | 0.607151449 |    | 1  |
| ENSRNOG00000014237 | 0.147759049  | 0.066872349 | 0.02713511  | 0.608448922 |    | 15 |
| ENSRNOG00000018885 | -0.179691675 | 0.081333881 | 0.027153156 | 0.608448922 |    | 1  |
| ENSRNOG00000020363 | 0.151617795  | 0.06860413  | 0.027102464 | 0.608448922 |    | 1  |
| ENSRNOG00000046256 | -0.179448227 | 0.08129219  | 0.027282822 | 0.609470506 |    | 6  |

|                    |              |             |             |               |    |
|--------------------|--------------|-------------|-------------|---------------|----|
| ENSRNOG00000055756 | -0.198102418 | 0.089719125 | 0.027242261 | 0.609470506 X |    |
| ENSRNOG00000006636 | -0.250661291 | 0.113593483 | 0.027338378 | 0.609772006   | 5  |
| ENSRNOG00000011282 | 0.131900002  | 0.059817003 | 0.027449976 | 0.611320659   | 1  |
| ENSRNOG00000013895 | 0.13822923   | 0.062735501 | 0.027569007 | 0.612741363   | 3  |
| ENSRNOG00000021132 | 0.181929463  | 0.082584485 | 0.027598297 | 0.612741363   | 1  |
| ENSRNOG00000003211 | -0.183608943 | 0.083445563 | 0.027782498 | 0.613309147   | 13 |
| ENSRNOG00000013642 | 0.151873265  | 0.068995158 | 0.027720718 | 0.613309147   | 5  |
| ENSRNOG00000013661 | 0.134540301  | 0.06114927  | 0.027793082 | 0.613309147   | 6  |
| ENSRNOG00000033593 | -0.159028786 | 0.072231703 | 0.027690181 | 0.613309147   | 5  |
| ENSRNOG00000001409 | 0.151236512  | 0.068838273 | 0.028021664 | 0.61362089    | 12 |
| ENSRNOG00000005157 | -0.162514322 | 0.073990201 | 0.028061157 | 0.61362089 X  |    |
| ENSRNOG00000011541 | 0.222056454  | 0.100969755 | 0.027861052 | 0.61362089    | 10 |
| ENSRNOG00000014002 | -0.219815952 | 0.100068289 | 0.028044778 | 0.61362089    | 2  |
| ENSRNOG00000043370 | -0.233817674 | 0.106428906 | 0.028024897 | 0.61362089    | 2  |
| ENSRNOG00000046420 | -0.218308605 | 0.099334074 | 0.027968977 | 0.61362089    | 1  |
| ENSRNOG00000008425 | 0.212633965  | 0.096895848 | 0.028202429 | 0.613959271   | 13 |
| ENSRNOG00000012162 | 0.160893421  | 0.073397297 | 0.028373066 | 0.613959271   | 10 |
| ENSRNOG00000015071 | -0.259447474 | 0.118258562 | 0.02824259  | 0.613959271   | 1  |
| ENSRNOG00000019165 | -0.184901964 | 0.08434231  | 0.028359291 | 0.613959271   | 4  |
| ENSRNOG00000019181 | 0.172534675  | 0.078686213 | 0.028329536 | 0.613959271   | 18 |
| ENSRNOG00000050946 | 0.215465549  | 0.098210651 | 0.028241719 | 0.613959271   | 3  |
| ENSRNOG00000055226 | 0.145712091  | 0.066462546 | 0.028351066 | 0.613959271   | 3  |
| ENSRNOG00000017703 | 0.181525408  | 0.08284035  | 0.028432404 | 0.614326367   | 1  |
| ENSRNOG00000018529 | 0.161933294  | 0.073932057 | 0.028502575 | 0.614926085   | 7  |
| ENSRNOG00000055613 | -0.162284667 | 0.07412242  | 0.028566761 | 0.615395103   | 2  |
| ENSRNOG00000000476 | 0.22042404   | 0.100773768 | 0.028719489 | 0.615939578   | 20 |
| ENSRNOG00000011394 | 0.179567249  | 0.082087254 | 0.028704817 | 0.615939578   | 6  |
| ENSRNOG00000018676 | -0.181677574 | 0.083046789 | 0.028694873 | 0.615939578   | 18 |
| ENSRNOG00000017491 | -0.218101745 | 0.099939689 | 0.029084918 | 0.616958401   | 9  |
| ENSRNOG00000018824 | 0.140338444  | 0.064274013 | 0.02900343  | 0.616958401   | 19 |
| ENSRNOG00000020010 | 0.208368825  | 0.095456395 | 0.029045444 | 0.616958401   | 1  |
| ENSRNOG00000020851 | 0.121848627  | 0.055816089 | 0.029033034 | 0.616958401   | 1  |
| ENSRNOG00000020889 | 0.133475037  | 0.061162883 | 0.02908827  | 0.616958401   | 1  |
| ENSRNOG00000021338 | 0.141976969  | 0.065066506 | 0.029107432 | 0.616958401   | 1  |
| ENSRNOG00000028641 | 0.164391141  | 0.075318974 | 0.029065329 | 0.616958401   | 20 |
| ENSRNOG00000030055 | -0.210400108 | 0.096420547 | 0.029101516 | 0.616958401   | 5  |
| ENSRNOG00000031930 | 0.159082144  | 0.072936334 | 0.029175306 | 0.617494279   | 7  |
| ENSRNOG00000003201 | -0.163312671 | 0.074949507 | 0.029333954 | 0.619947025 X |    |
| ENSRNOG00000032575 | 0.205465373  | 0.094331988 | 0.029397905 | 0.620394226   | 16 |
| ENSRNOG00000016067 | -0.165516804 | 0.076018894 | 0.029457342 | 0.620744983   | 3  |
| ENSRNOG00000006217 | 0.156286013  | 0.071851187 | 0.02962002  | 0.622256334   | 7  |
| ENSRNOG00000010993 | -0.178852857 | 0.082245174 | 0.029657824 | 0.622256334   | 3  |
| ENSRNOG00000059057 | -0.200614832 | 0.092234534 | 0.029626282 | 0.622256334   | 16 |
| ENSRNOG00000020812 | 0.196497168  | 0.090407894 | 0.029746356 | 0.623211944   | 1  |
| ENSRNOG00000011352 | 0.135510046  | 0.062418176 | 0.029930947 | 0.62617442    | 1  |
| ENSRNOG00000016509 | 0.169162004  | 0.077955813 | 0.030008896 | 0.626900544   | 19 |
| ENSRNOG00000010048 | 0.128838927  | 0.059459177 | 0.030246539 | 0.630955861   | 4  |
| ENSRNOG00000000396 | -0.164720889 | 0.076320677 | 0.03090658  | 0.631642385   | 20 |
| ENSRNOG00000000918 | 0.231861582  | 0.108043976 | 0.031873562 | 0.631642385   | 12 |
| ENSRNOG00000001597 | -0.195292894 | 0.091037683 | 0.031937864 | 0.631642385   | 3  |

|                    |              |             |             |                         |    |
|--------------------|--------------|-------------|-------------|-------------------------|----|
| ENSRNOG00000002116 | 0.163099176  | 0.075961702 | 0.031783429 | 0.631642385             | 1  |
| ENSRNOG00000002855 | -0.170561963 | 0.078956185 | 0.030756395 | 0.631642385             | 14 |
| ENSRNOG00000003975 | 0.153361349  | 0.070946969 | 0.030646434 | 0.631642385             | 10 |
| ENSRNOG00000004766 | 0.156323013  | 0.072916614 | 0.032044104 | 0.631642385             | 10 |
| ENSRNOG00000005021 | -0.213794053 | 0.099565175 | 0.031771201 | 0.631642385             | 3  |
| ENSRNOG00000005149 | -0.161986171 | 0.075567688 | 0.032065719 | 0.631642385             | 8  |
| ENSRNOG00000005261 | -0.193103185 | 0.089922752 | 0.031758737 | 0.631642385             | 14 |
| ENSRNOG00000005927 | -0.141290572 | 0.065889421 | 0.032004133 | 0.631642385             | 7  |
| ENSRNOG00000008734 | -0.17058608  | 0.078864997 | 0.030540114 | 0.631642385             | 15 |
| ENSRNOG00000010555 | 0.365272194  | 0.169893256 | 0.031554426 | 0.631642385             | 15 |
| ENSRNOG00000011175 | -0.131276785 | 0.060725215 | 0.030632306 | 0.631642385             | 4  |
| ENSRNOG00000011348 | -0.211393625 | 0.098215978 | 0.031371029 | 0.631642385             | 8  |
| ENSRNOG00000011829 | -0.233282333 | 0.108106653 | 0.030936336 | 0.631642385             | 19 |
| ENSRNOG00000012683 | 0.155392193  | 0.07229736  | 0.031606817 | 0.631642385             | 1  |
| ENSRNOG00000013865 | -0.223545805 | 0.104033562 | 0.03165141  | 0.631642385             | 5  |
| ENSRNOG00000014376 | 0.145825508  | 0.06759647  | 0.030982708 | 0.631642385             | 18 |
| ENSRNOG00000015380 | 0.142766665  | 0.066531726 | 0.031885476 | 0.631642385             | 10 |
| ENSRNOG00000015441 | 0.272173248  | 0.126414199 | 0.031316516 | 0.631642385             | 1  |
| ENSRNOG00000016870 | 0.164449502  | 0.076418548 | 0.031400666 | 0.631642385             | 3  |
| ENSRNOG00000017223 | 0.199044277  | 0.091976504 | 0.030458406 | 0.631642385             | 1  |
| ENSRNOG00000018796 | 0.145028113  | 0.067203135 | 0.030923496 | 0.631642385             | 19 |
| ENSRNOG00000019741 | 0.139847106  | 0.065050699 | 0.031569685 | 0.631642385             | 16 |
| ENSRNOG00000020005 | 0.12758608   | 0.059480235 | 0.031951535 | 0.631642385             | 7  |
| ENSRNOG00000020024 | -0.203217209 | 0.094009832 | 0.030644463 | 0.631642385             | 18 |
| ENSRNOG00000020032 | 0.142688251  | 0.066435589 | 0.031732167 | 0.631642385             | 4  |
| ENSRNOG00000020501 | 0.150628893  | 0.069771753 | 0.03085942  | 0.631642385             | 7  |
| ENSRNOG00000021438 | 0.150629649  | 0.070094714 | 0.0316388   | 0.631642385             | 7  |
| ENSRNOG00000021773 | 0.151826536  | 0.070525046 | 0.03133416  | 0.631642385             | 7  |
| ENSRNOG00000023322 | -0.181154412 | 0.084181508 | 0.031401278 | 0.631642385             | 2  |
| ENSRNOG00000028461 | -0.160462457 | 0.07429309  | 0.030783735 | 0.631642385             | 16 |
| ENSRNOG00000029805 | -0.245392814 | 0.114343563 | 0.031864936 | 0.631642385             | 1  |
| ENSRNOG00000032391 | -0.181389892 | 0.083891135 | 0.030602323 | 0.631642385             | 6  |
| ENSRNOG00000037225 | -0.179692514 | 0.083056587 | 0.030503125 | 0.631642385             | 9  |
| ENSRNOG00000037607 | 0.163099176  | 0.075961702 | 0.031783429 | 0.631642385             | 1  |
| ENSRNOG00000047598 | 0.174745149  | 0.081422995 | 0.031861808 | 0.631642385             | 7  |
| ENSRNOG00000047781 | 0.146971386  | 0.068058069 | 0.030811414 | 0.631642385             | 9  |
| ENSRNOG00000056703 | -0.156989429 | 0.072943697 | 0.031381601 | 0.631642385 X           |    |
| ENSRNOG00000058643 | -0.225048583 | 0.104023264 | 0.030506989 | 0.631642385             | 13 |
| ENSRNOG00000015236 | 0.133979074  | 0.062560156 | 0.032225369 | 0.633925916             | 10 |
| ENSRNOG00000009592 | 0.123089703  | 0.057521113 | 0.032362464 | 0.634899876             | 7  |
| ENSRNOG00000054959 | 0.251284578  | 0.117427348 | 0.032361612 | 0.634899876 AABR0702410 |    |
| ENSRNOG00000016403 | -0.261789486 | 0.122375728 | 0.032417272 | 0.635115697             | 17 |
| ENSRNOG00000014666 | 0.175577593  | 0.082188751 | 0.032657185 | 0.635900792             | 9  |
| ENSRNOG00000015308 | -0.256224771 | 0.119919671 | 0.032627551 | 0.635900792             | 15 |
| ENSRNOG00000018790 | 0.466302271  | 0.218302843 | 0.032676651 | 0.635900792             | 10 |
| ENSRNOG00000046005 | 0.106390896  | 0.049773993 | 0.032559001 | 0.635900792             | 1  |
| ENSRNOG00000047692 | -0.265291133 | 0.124077087 | 0.032507377 | 0.635900792             | 1  |
| ENSRNOG00000032908 | 0.154982957  | 0.072600158 | 0.032781696 | 0.636637717             | 8  |
| ENSRNOG00000054391 | 0.131676986  | 0.061690017 | 0.032802343 | 0.636637717             | 1  |
| ENSRNOG00000046112 | 0.180305297  | 0.084497461 | 0.032854684 | 0.636801084             | 1  |

|                    |              |             |             |              |    |
|--------------------|--------------|-------------|-------------|--------------|----|
| ENSRNOG00000046647 | -0.130341356 | 0.061106966 | 0.032924461 | 0.637301508  | 17 |
| ENSRNOG00000049598 | -2.175036935 | 1.020046857 | 0.032982915 | 0.637581739  | 11 |
| ENSRNOG00000018214 | 0.19089558   | 0.089643015 | 0.033212197 | 0.640688974  | 9  |
| ENSRNOG00000021403 | 0.212296502  | 0.099703953 | 0.033232039 | 0.640688974  | 6  |
| ENSRNOG00000020281 | -0.160174862 | 0.075248861 | 0.033287218 | 0.640900521  | 1  |
| ENSRNOG00000020715 | 0.125439983  | 0.058963395 | 0.033385092 | 0.641932453  | 1  |
| ENSRNOG00000003803 | -0.202916385 | 0.095575059 | 0.033744617 | 0.643086574  | 7  |
| ENSRNOG00000008065 | 0.382683988  | 0.180046663 | 0.033547319 | 0.643086574  | 10 |
| ENSRNOG00000008287 | 0.181028409  | 0.085207434 | 0.033623243 | 0.643086574  | 10 |
| ENSRNOG00000014999 | -0.127041297 | 0.059841053 | 0.033755613 | 0.643086574  | 2  |
| ENSRNOG00000016102 | 0.309635609  | 0.145708262 | 0.033583434 | 0.643086574  | 1  |
| ENSRNOG00000042286 | -0.220084525 | 0.103583983 | 0.033611946 | 0.643086574  | 13 |
| ENSRNOG00000049593 | 0.414501805  | 0.19515102  | 0.033669699 | 0.643086574  | 4  |
| ENSRNOG00000058662 | 0.147240435  | 0.069384437 | 0.033829679 | 0.643651825  | 16 |
| ENSRNOG00000001238 | -0.177978635 | 0.083977828 | 0.034060672 | 0.644711469  | 12 |
| ENSRNOG00000004141 | 0.199540806  | 0.094085064 | 0.033933982 | 0.644711469  | 10 |
| ENSRNOG00000026378 | -0.329948367 | 0.155624904 | 0.033993275 | 0.644711469  | 3  |
| ENSRNOG00000028368 | 0.134955579  | 0.063678652 | 0.034063249 | 0.644711469  | 13 |
| ENSRNOG00000042271 | 0.121613083  | 0.057426714 | 0.034199698 | 0.646450085  | 10 |
| ENSRNOG00000013813 | 0.202408324  | 0.095655253 | 0.034343199 | 0.647034402  | 1  |
| ENSRNOG00000014293 | 0.136525036  | 0.064513671 | 0.034326213 | 0.647034402  | 19 |
| ENSRNOG00000014511 | -0.165040952 | 0.078016234 | 0.034389964 | 0.647034402  | 7  |
| ENSRNOG00000018390 | 0.129760836  | 0.061345554 | 0.034409127 | 0.647034402  | 1  |
| ENSRNOG00000055760 | -0.164061159 | 0.077602016 | 0.034503716 | 0.647972644  | 2  |
| ENSRNOG00000018657 | -0.195180096 | 0.092402246 | 0.034661809 | 0.649584005  | 3  |
| ENSRNOG00000054446 | -0.173457168 | 0.082126022 | 0.03467913  | 0.649584005  | 8  |
| ENSRNOG00000010160 | -0.217350429 | 0.102939317 | 0.034734313 | 0.649778149  | 8  |
| ENSRNOG00000011203 | 0.154688719  | 0.073320065 | 0.034877884 | 0.651623139  | 15 |
| ENSRNOG00000006206 | -0.152855005 | 0.072503892 | 0.03501095  | 0.652083594  | 4  |
| ENSRNOG00000019316 | 0.138733054  | 0.06581498  | 0.035037462 | 0.652083594  | 9  |
| ENSRNOG00000052173 | -0.280825675 | 0.13320988  | 0.035018493 | 0.652083594  | 2  |
| ENSRNOG00000033434 | -0.33155829  | 0.157437823 | 0.035207534 | 0.654408748  | 8  |
| ENSRNOG00000003139 | -0.181859442 | 0.086498286 | 0.035512741 | 0.65444217 X |    |
| ENSRNOG00000005346 | -0.295128434 | 0.140382306 | 0.035525313 | 0.65444217   | 14 |
| ENSRNOG00000006335 | -0.140019091 | 0.066575406 | 0.035451311 | 0.65444217   | 5  |
| ENSRNOG00000007398 | 0.282098463  | 0.134105756 | 0.035417524 | 0.65444217   | 5  |
| ENSRNOG00000010252 | 0.159499908  | 0.075789739 | 0.035334392 | 0.65444217   | 8  |
| ENSRNOG00000014866 | -0.180236922 | 0.085687959 | 0.035429932 | 0.65444217   | 13 |
| ENSRNOG00000054340 | -0.399458823 | 0.18985412  | 0.035375803 | 0.65444217   | 2  |
| ENSRNOG00000020441 | 0.175300637  | 0.083454901 | 0.035681072 | 0.656477386  | 10 |
| ENSRNOG00000018517 | -0.830255051 | 0.395368109 | 0.035732841 | 0.656596619  | 1  |
| ENSRNOG00000000437 | 0.139537936  | 0.066617446 | 0.036205186 | 0.657380001  | 20 |
| ENSRNOG00000004185 | -0.165693488 | 0.079102208 | 0.036199814 | 0.657380001  | 7  |
| ENSRNOG00000015290 | -0.141316837 | 0.067475304 | 0.036228902 | 0.657380001  | 4  |
| ENSRNOG00000016789 | 0.135518795  | 0.064649106 | 0.036062615 | 0.657380001  | 9  |
| ENSRNOG00000018615 | -0.308771161 | 0.147400423 | 0.036190733 | 0.657380001  | 2  |
| ENSRNOG00000018666 | 0.223970148  | 0.106913976 | 0.036183159 | 0.657380001  | 3  |
| ENSRNOG00000019766 | 0.238483343  | 0.1138091   | 0.036129397 | 0.657380001  | 19 |
| ENSRNOG00000020546 | 0.247107541  | 0.117854975 | 0.036019378 | 0.657380001  | 1  |
| ENSRNOG00000025028 | -0.185315376 | 0.088437862 | 0.036132759 | 0.657380001  | 11 |

|                    |              |             |             |                |    |
|--------------------|--------------|-------------|-------------|----------------|----|
| ENSRNOG00000046918 | -0.336838209 | 0.160688594 | 0.03606292  | 0.657380001 X  |    |
| ENSRNOG00000002054 | -0.281670569 | 0.134644248 | 0.036441969 | 0.657699324    | 14 |
| ENSRNOG00000002419 | -0.355528097 | 0.169901445 | 0.036388908 | 0.657699324 X  |    |
| ENSRNOG00000014672 | 0.294894168  | 0.140889033 | 0.036340651 | 0.657699324    | 10 |
| ENSRNOG00000017822 | -0.13718078  | 0.065633807 | 0.036609419 | 0.657699324    | 1  |
| ENSRNOG00000019093 | 0.180659571  | 0.086419587 | 0.036573506 | 0.657699324    | 18 |
| ENSRNOG00000054311 | -0.900940441 | 0.430817073 | 0.036506858 | 0.657699324    | 12 |
| ENSRNOG00000055583 | 0.136880211  | 0.065475418 | 0.036567632 | 0.657699324    | 12 |
| ENSRNOG00000057125 | 0.137636074  | 0.065760481 | 0.036349987 | 0.657699324    | 20 |
| ENSRNOG00000003442 | 0.162635591  | 0.077843686 | 0.036684449 | 0.65771319     | 13 |
| ENSRNOG00000008372 | -0.230500252 | 0.110415802 | 0.03683702  | 0.65771319     | 12 |
| ENSRNOG00000012579 | -0.252896016 | 0.121063285 | 0.036711579 | 0.65771319     | 10 |
| ENSRNOG00000018740 | -0.115495582 | 0.055305956 | 0.036770532 | 0.65771319     | 9  |
| ENSRNOG00000026643 | -0.203406714 | 0.097428231 | 0.036819536 | 0.65771319     | 8  |
| ENSRNOG00000017295 | 0.164819833  | 0.079093917 | 0.037173843 | 0.661283902    | 3  |
| ENSRNOG00000032070 | -0.19841505  | 0.095192948 | 0.037128697 | 0.661283902    | 8  |
| ENSRNOG00000050996 | -0.208576886 | 0.100057519 | 0.037108365 | 0.661283902    | 15 |
| ENSRNOG00000016271 | 0.141620719  | 0.067989687 | 0.037253637 | 0.661633206    | 15 |
| ENSRNOG00000021177 | 0.153983493  | 0.073947222 | 0.037311135 | 0.661633206    | 1  |
| ENSRNOG00000030700 | -0.135827331 | 0.065234727 | 0.037330388 | 0.661633206 MT |    |
| ENSRNOG00000003990 | 0.12781536   | 0.061424987 | 0.037448867 | 0.661971521    | 10 |
| ENSRNOG00000011654 | -0.22176426  | 0.106566551 | 0.037434536 | 0.661971521    | 2  |
| ENSRNOG00000036576 | -0.223470311 | 0.107415637 | 0.037486455 | 0.661971521    | 1  |
| ENSRNOG00000005981 | -0.163282175 | 0.078560579 | 0.037670345 | 0.662106793    | 4  |
| ENSRNOG00000018516 | 0.133158715  | 0.064028387 | 0.037554665 | 0.662106793    | 18 |
| ENSRNOG00000021681 | -0.18992363  | 0.091381764 | 0.03767679  | 0.662106793    | 7  |
| ENSRNOG00000031173 | 0.121089769  | 0.058235874 | 0.037589918 | 0.662106793    | 4  |
| ENSRNOG00000020675 | 0.173301357  | 0.083406144 | 0.037727706 | 0.662198881    | 1  |
| ENSRNOG00000047089 | 0.22395393   | 0.107810581 | 0.037774726 | 0.662222457    | 9  |
| ENSRNOG00000036682 | 0.152907375  | 0.073639887 | 0.03785507  | 0.662829476    | 10 |
| ENSRNOG00000004076 | -0.268239519 | 0.129235809 | 0.037932628 | 0.663386298    | 9  |
| ENSRNOG00000003228 | 0.136819539  | 0.065959089 | 0.038050613 | 0.663503212 X  |    |
| ENSRNOG00000011341 | -0.25885014  | 0.124816157 | 0.03809313  | 0.663503212    | 2  |
| ENSRNOG00000012722 | 0.176418609  | 0.085053642 | 0.038060365 | 0.663503212    | 3  |
| ENSRNOG00000014617 | -0.133413908 | 0.064341238 | 0.038122374 | 0.663503212    | 4  |
| ENSRNOG00000011987 | -0.147550183 | 0.071176515 | 0.038170622 | 0.663546368    | 9  |
| ENSRNOG00000019299 | 0.137163645  | 0.066198549 | 0.038265085 | 0.663597134    | 3  |
| ENSRNOG00000048256 | 0.277593794  | 0.133960642 | 0.03824641  | 0.663597134    | 2  |
| ENSRNOG00000024955 | -0.146483651 | 0.070720312 | 0.038329885 | 0.663926722    | 7  |
| ENSRNOG00000007946 | 0.177501742  | 0.085749711 | 0.038452519 | 0.664681805    | 3  |
| ENSRNOG00000010752 | -0.19331314  | 0.093416247 | 0.038511016 | 0.664681805    | 1  |
| ENSRNOG00000024967 | -0.212737742 | 0.102794345 | 0.038494774 | 0.664681805    | 7  |
| ENSRNOG00000003597 | 0.147486666  | 0.071352146 | 0.038731803 | 0.666904603    | 9  |
| ENSRNOG00000020230 | 0.144369852  | 0.069828802 | 0.038688677 | 0.666904603    | 7  |
| ENSRNOG00000008124 | -0.174254646 | 0.084364712 | 0.038876462 | 0.667480875    | 5  |
| ENSRNOG00000010428 | 0.246564041  | 0.119445364 | 0.038994853 | 0.667480875    | 3  |
| ENSRNOG00000020289 | 0.150671684  | 0.072932958 | 0.038838589 | 0.667480875    | 1  |
| ENSRNOG00000025209 | 0.122035375  | 0.059128717 | 0.039027814 | 0.667480875    | 4  |
| ENSRNOG00000036839 | -0.116502596 | 0.056451917 | 0.039041508 | 0.667480875    | 7  |
| ENSRNOG00000038807 | 0.641010511  | 0.310498793 | 0.03897468  | 0.667480875    | 20 |

|                    |              |             |             |               |    |
|--------------------|--------------|-------------|-------------|---------------|----|
| ENSRNOG00000001602 | -0.164911461 | 0.080216756 | 0.039799569 | 0.667624489   | 11 |
| ENSRNOG00000002254 | -0.155991958 | 0.075855137 | 0.039739592 | 0.667624489   | 14 |
| ENSRNOG00000003129 | 0.130893028  | 0.063506908 | 0.039295094 | 0.667624489   | 10 |
| ENSRNOG00000005284 | 0.305107035  | 0.14811827  | 0.039409257 | 0.667624489   | 3  |
| ENSRNOG00000007114 | -0.179399101 | 0.087320637 | 0.039928593 | 0.667624489   | 6  |
| ENSRNOG00000007629 | -0.177747592 | 0.086440904 | 0.039754544 | 0.667624489   | 5  |
| ENSRNOG00000008193 | -0.147638385 | 0.071912077 | 0.04006868  | 0.667624489   | 13 |
| ENSRNOG00000010708 | 0.130688236  | 0.063633866 | 0.039999615 | 0.667624489   | 15 |
| ENSRNOG00000012832 | 0.183726136  | 0.089342767 | 0.039742176 | 0.667624489   | 7  |
| ENSRNOG00000012940 | -0.189222106 | 0.092228056 | 0.040201144 | 0.667624489   | 17 |
| ENSRNOG00000013039 | 0.123695493  | 0.060158953 | 0.039768602 | 0.667624489   | 14 |
| ENSRNOG00000017817 | 0.127590913  | 0.062175553 | 0.040159224 | 0.667624489   | 19 |
| ENSRNOG00000022736 | -0.174492005 | 0.084772353 | 0.039555605 | 0.667624489   | 16 |
| ENSRNOG00000025408 | -0.427532707 | 0.207969773 | 0.039807155 | 0.667624489   | 16 |
| ENSRNOG00000026211 | 0.155865417  | 0.075711161 | 0.039524444 | 0.667624489   | 19 |
| ENSRNOG00000030351 | -0.153884245 | 0.074943428 | 0.040039735 | 0.667624489   | 1  |
| ENSRNOG00000031312 | 0.191771787  | 0.093135807 | 0.039488932 | 0.667624489   | 4  |
| ENSRNOG00000037768 | 0.286628514  | 0.139188283 | 0.039466827 | 0.667624489   | 4  |
| ENSRNOG00000042826 | -0.421573065 | 0.204764596 | 0.039511663 | 0.667624489   | 1  |
| ENSRNOG00000045760 | -0.295671014 | 0.14345626  | 0.039297945 | 0.667624489   | 5  |
| ENSRNOG00000046460 | -0.212942946 | 0.103421247 | 0.039495536 | 0.667624489   | 13 |
| ENSRNOG00000049330 | -0.200339186 | 0.09753404  | 0.039971456 | 0.667624489   | 9  |
| ENSRNOG00000052968 | -0.123905336 | 0.060381644 | 0.040166117 | 0.667624489   | 3  |
| ENSRNOG00000060557 | -2.51790994  | 1.225592929 | 0.039932904 | 0.667624489   | 17 |
| ENSRNOG00000060793 | -0.128225294 | 0.062184015 | 0.039204894 | 0.667624489 X |    |
| ENSRNOG00000022347 | -0.272831359 | 0.133104094 | 0.040387921 | 0.669958903   | 2  |
| ENSRNOG00000008115 | -0.180505979 | 0.088104182 | 0.040483751 | 0.67014142    | 3  |
| ENSRNOG00000011885 | 0.156426832  | 0.076354158 | 0.04049137  | 0.67014142    | 1  |
| ENSRNOG00000027487 | 0.120240681  | 0.058719328 | 0.040587546 | 0.670967201   | 1  |
| ENSRNOG00000004723 | -0.242065631 | 0.118246033 | 0.040644799 | 0.671148395   | 6  |
| ENSRNOG00000000517 | 0.288572652  | 0.141045187 | 0.040760418 | 0.671335916   | 20 |
| ENSRNOG00000002751 | -0.222298655 | 0.108760446 | 0.040960538 | 0.671335916 X |    |
| ENSRNOG00000006803 | -0.151168015 | 0.073904232 | 0.040809709 | 0.671335916   | 3  |
| ENSRNOG00000012988 | 0.524842551  | 0.256946206 | 0.04109042  | 0.671335916   | 1  |
| ENSRNOG00000016054 | 0.130232271  | 0.063763963 | 0.04111107  | 0.671335916   | 1  |
| ENSRNOG00000016779 | 0.124636499  | 0.060924077 | 0.040779247 | 0.671335916   | 17 |
| ENSRNOG00000017612 | -0.159951535 | 0.078270773 | 0.040996385 | 0.671335916   | 19 |
| ENSRNOG00000020350 | 0.15769276   | 0.077200769 | 0.041088881 | 0.671335916   | 1  |
| ENSRNOG00000029667 | -0.226668682 | 0.110985556 | 0.041119209 | 0.671335916   | 17 |
| ENSRNOG00000059572 | 0.204856686  | 0.100275348 | 0.041058214 | 0.671335916   | 1  |
| ENSRNOG00000021003 | 0.239494802  | 0.117326772 | 0.041224691 | 0.672300972   | 1  |
| ENSRNOG00000001228 | 0.176145857  | 0.086402663 | 0.041483736 | 0.673896587   | 20 |
| ENSRNOG00000019743 | 0.127580802  | 0.06257843  | 0.041476537 | 0.673896587   | 9  |
| ENSRNOG00000023786 | 0.139020805  | 0.068200447 | 0.04150846  | 0.673896587   | 5  |
| ENSRNOG00000059492 | -0.219476475 | 0.107654062 | 0.041477994 | 0.673896587   | 1  |
| ENSRNOG00000001135 | 0.165650091  | 0.081300927 | 0.041600636 | 0.6740835     | 12 |
| ENSRNOG00000008356 | -0.187514207 | 0.092037378 | 0.041612963 | 0.6740835     | 8  |
| ENSRNOG00000009478 | -0.168781086 | 0.08306179  | 0.04215423  | 0.676376367   | 5  |
| ENSRNOG00000012099 | -0.212904154 | 0.104780161 | 0.042162482 | 0.676376367   | 2  |
| ENSRNOG00000012733 | -0.171440132 | 0.084320206 | 0.042031975 | 0.676376367   | 9  |

|                    |              |             |             |               |    |
|--------------------|--------------|-------------|-------------|---------------|----|
| ENSRNOG00000015385 | 0.153513243  | 0.07543683  | 0.041851815 | 0.676376367   | 5  |
| ENSRNOG00000019861 | 0.142799102  | 0.070248046 | 0.042074352 | 0.676376367   | 1  |
| ENSRNOG00000026742 | -0.205711138 | 0.101130925 | 0.041940794 | 0.676376367   | 6  |
| ENSRNOG00000030871 | -0.163954881 | 0.080683304 | 0.042145618 | 0.676376367   | 15 |
| ENSRNOG00000033835 | 0.136932987  | 0.067395071 | 0.042174385 | 0.676376367   | 3  |
| ENSRNOG00000053452 | 0.108317197  | 0.053222684 | 0.041833794 | 0.676376367   | 3  |
| ENSRNOG00000004740 | -0.187487795 | 0.092315728 | 0.042260982 | 0.676547517   | 3  |
| ENSRNOG00000015529 | -0.208055699 | 0.102451658 | 0.042278387 | 0.676547517   | 4  |
| ENSRNOG00000010607 | 0.367971694  | 0.181309183 | 0.042404748 | 0.677821424   | 3  |
| ENSRNOG00000005446 | 0.172557484  | 0.08515414  | 0.042722446 | 0.679055199   | 7  |
| ENSRNOG00000006391 | -0.141960894 | 0.070068927 | 0.04276296  | 0.679055199   | 4  |
| ENSRNOG00000012826 | 0.122646883  | 0.060521019 | 0.042711815 | 0.679055199   | 4  |
| ENSRNOG00000050500 | 0.200309811  | 0.098809735 | 0.042639153 | 0.679055199   | 7  |
| ENSRNOG00000052664 | -0.119865372 | 0.05915336  | 0.042728999 | 0.679055199   | 1  |
| ENSRNOG00000060365 | -1.176107852 | 0.579982544 | 0.042577276 | 0.679055199   | 15 |
| ENSRNOG00000013587 | -0.146551511 | 0.072395915 | 0.042938641 | 0.680461542   | 9  |
| ENSRNOG00000016390 | -0.201743445 | 0.099708682 | 0.043039263 | 0.680461542   | 17 |
| ENSRNOG00000017318 | -0.260915983 | 0.128929943 | 0.043000664 | 0.680461542   | 17 |
| ENSRNOG00000062030 | 0.223407602  | 0.110385848 | 0.0429826   | 0.680461542   | 16 |
| ENSRNOG00000006797 | -0.230084787 | 0.113752809 | 0.043106825 | 0.680787307 X |    |
| ENSRNOG00000018920 | -0.147476692 | 0.072948608 | 0.043212326 | 0.680969887   | 7  |
| ENSRNOG00000056069 | -0.164601838 | 0.081402218 | 0.043168035 | 0.680969887   | 1  |
| ENSRNOG00000006048 | -0.174762037 | 0.086474996 | 0.043284468 | 0.681366145   | 4  |
| ENSRNOG00000019236 | 0.163756247  | 0.081071686 | 0.043394338 | 0.681615507   | 5  |
| ENSRNOG00000025481 | 0.13538748   | 0.06702093  | 0.043375338 | 0.681615507   | 7  |
| ENSRNOG00000056596 | 0.166847496  | 0.082695447 | 0.043631471 | 0.68459856    | 8  |
| ENSRNOG00000000996 | 0.164251266  | 0.081497649 | 0.043861593 | 0.684682184   | 12 |
| ENSRNOG00000003013 | -0.336607471 | 0.166903074 | 0.043718046 | 0.684682184 X |    |
| ENSRNOG00000007920 | 0.142937366  | 0.070926    | 0.043872931 | 0.684682184   | 5  |
| ENSRNOG00000018781 | 0.162595899  | 0.080668499 | 0.043841208 | 0.684682184   | 16 |
| ENSRNOG00000027368 | 0.167033186  | 0.082868717 | 0.04383803  | 0.684682184   | 10 |
| ENSRNOG00000004364 | -0.185864168 | 0.092277404 | 0.043989654 | 0.684919597   | 6  |
| ENSRNOG00000013545 | 0.143282541  | 0.07115011  | 0.044029871 | 0.684919597   | 7  |
| ENSRNOG00000051170 | -0.145585493 | 0.072276486 | 0.043979545 | 0.684919597   | 7  |
| ENSRNOG00000010034 | -0.13779531  | 0.068453367 | 0.044116656 | 0.685534062   | 16 |
| ENSRNOG00000003276 | 0.137209526  | 0.068336357 | 0.044658656 | 0.685620895   | 10 |
| ENSRNOG00000004909 | -0.157157118 | 0.078407073 | 0.045029986 | 0.685620895   | 7  |
| ENSRNOG00000005428 | 0.131656506  | 0.065542444 | 0.044566695 | 0.685620895   | 14 |
| ENSRNOG00000005451 | -0.182474311 | 0.09098269  | 0.044899613 | 0.685620895   | 6  |
| ENSRNOG00000006844 | 0.145066203  | 0.072283165 | 0.044758662 | 0.685620895   | 7  |
| ENSRNOG00000010794 | 0.165767575  | 0.082600423 | 0.044764454 | 0.685620895   | 7  |
| ENSRNOG00000011156 | 0.162654999  | 0.081145904 | 0.04501912  | 0.685620895   | 4  |
| ENSRNOG00000014031 | -0.179908074 | 0.089773651 | 0.045068059 | 0.685620895   | 18 |
| ENSRNOG00000014119 | -0.163373255 | 0.081389515 | 0.044717622 | 0.685620895   | 9  |
| ENSRNOG00000016957 | 0.158418044  | 0.079043372 | 0.045049565 | 0.685620895   | 9  |
| ENSRNOG00000017108 | 0.217102649  | 0.108192675 | 0.044789093 | 0.685620895   | 7  |
| ENSRNOG00000018904 | -0.17821272  | 0.088660723 | 0.044425617 | 0.685620895   | 9  |
| ENSRNOG00000019768 | -0.141829431 | 0.070483337 | 0.044194582 | 0.685620895   | 16 |
| ENSRNOG00000030109 | -0.319072556 | 0.159128391 | 0.044949524 | 0.685620895   | 20 |
| ENSRNOG00000032878 | 0.115105693  | 0.057291286 | 0.044523254 | 0.685620895   | 18 |

|                    |              |             |             |               |    |
|--------------------|--------------|-------------|-------------|---------------|----|
| ENSRNOG00000036841 | -0.201469006 | 0.100175839 | 0.044309227 | 0.685620895   | 7  |
| ENSRNOG00000053328 | -0.346105208 | 0.172111986 | 0.044332819 | 0.685620895   | 1  |
| ENSRNOG00000055917 | 0.151942908  | 0.075794468 | 0.044998321 | 0.685620895   | 17 |
| ENSRNOG00000058156 | 0.448393252  | 0.223157334 | 0.044503798 | 0.685620895   | 5  |
| ENSRNOG00000061085 | -0.208357714 | 0.103940614 | 0.045007516 | 0.685620895   | 4  |
| ENSRNOG00000010800 | -0.136904125 | 0.068416457 | 0.045387988 | 0.688307249   | 6  |
| ENSRNOG00000015033 | 0.134321156  | 0.067149263 | 0.045463884 | 0.688307249   | 14 |
| ENSRNOG00000018021 | -0.197862862 | 0.098885965 | 0.045401059 | 0.688307249   | 2  |
| ENSRNOG00000027513 | -0.119229155 | 0.059573222 | 0.04535055  | 0.688307249   | 3  |
| ENSRNOG00000028946 | 0.127418385  | 0.063703811 | 0.045482021 | 0.688307249   | 10 |
| ENSRNOG00000013598 | -0.225134095 | 0.112675495 | 0.045708525 | 0.691013756   | 5  |
| ENSRNOG00000011078 | 0.141261165  | 0.070738467 | 0.045830639 | 0.692064545   | 5  |
| ENSRNOG00000019356 | 0.13004668   | 0.065152181 | 0.045929034 | 0.692064545   | 1  |
| ENSRNOG00000032569 | 0.263466252  | 0.13199591  | 0.045931931 | 0.692064545   | 7  |
| ENSRNOG00000032803 | -0.145712627 | 0.073034252 | 0.046029003 | 0.692064545 X |    |
| ENSRNOG00000049402 | 0.154019428  | 0.077210371 | 0.046064442 | 0.692064545   | 5  |
| ENSRNOG00000055331 | -0.164130114 | 0.082255321 | 0.046002124 | 0.692064545   | 16 |
| ENSRNOG00000002624 | -0.306872849 | 0.154054044 | 0.046373056 | 0.693825152   | 17 |
| ENSRNOG00000018881 | 0.185753883  | 0.093192395 | 0.04623626  | 0.693825152   | 10 |
| ENSRNOG00000026913 | -0.337965486 | 0.169648379 | 0.0463543   | 0.693825152   | 7  |
| ENSRNOG00000036592 | -0.234910373 | 0.117904323 | 0.046329233 | 0.693825152   | 1  |
| ENSRNOG00000000979 | 0.225358235  | 0.113291158 | 0.046679654 | 0.694827126   | 12 |
| ENSRNOG00000004967 | -0.167582302 | 0.084217677 | 0.046605162 | 0.694827126   | 3  |
| ENSRNOG00000011278 | -0.197106747 | 0.099044972 | 0.046582871 | 0.694827126   | 7  |
| ENSRNOG00000019883 | 0.152493165  | 0.076622374 | 0.04656989  | 0.694827126   | 1  |
| ENSRNOG00000051245 | -0.839806768 | 0.422148481 | 0.046661098 | 0.694827126 X |    |
| ENSRNOG00000000909 | -0.175292783 | 0.088344984 | 0.047235231 | 0.695245057   | 12 |
| ENSRNOG00000006871 | -0.386198391 | 0.194491562 | 0.047068647 | 0.695245057 X |    |
| ENSRNOG00000012880 | -0.159383886 | 0.080190505 | 0.046859758 | 0.695245057   | 3  |
| ENSRNOG00000018689 | 0.171243111  | 0.086295164 | 0.047212573 | 0.695245057   | 8  |
| ENSRNOG00000021061 | 0.240295225  | 0.121003651 | 0.047049867 | 0.695245057   | 1  |
| ENSRNOG00000023348 | 0.179562184  | 0.09041585  | 0.047037861 | 0.695245057   | 5  |
| ENSRNOG00000026748 | 0.121765863  | 0.061353422 | 0.047181983 | 0.695245057   | 4  |
| ENSRNOG00000037366 | -2.11001528  | 1.063414003 | 0.047234679 | 0.695245057   | 1  |
| ENSRNOG00000048577 | -0.175653584 | 0.088493159 | 0.047151182 | 0.695245057   | 7  |
| ENSRNOG00000058694 | -0.224258534 | 0.112806966 | 0.04681337  | 0.695245057   | 2  |
| ENSRNOG00000060931 | -0.272372439 | 0.137083567 | 0.046932591 | 0.695245057   | 19 |
| ENSRNOG00000008794 | -0.242960818 | 0.122499042 | 0.047326213 | 0.695877725   | 15 |
| ENSRNOG00000020155 | -0.232059386 | 0.117047869 | 0.047411859 | 0.695949176   | 16 |
| ENSRNOG00000046472 | 0.123924764  | 0.062510402 | 0.047427079 | 0.695949176   | 7  |
| ENSRNOG00000001524 | -0.191140839 | 0.096634428 | 0.047931111 | 0.697704523   | 3  |
| ENSRNOG00000006868 | 0.139716965  | 0.070628793 | 0.047907607 | 0.697704523   | 10 |
| ENSRNOG00000010463 | -0.35743565  | 0.180566586 | 0.047757189 | 0.697704523   | 4  |
| ENSRNOG00000014751 | 0.10621919   | 0.053735739 | 0.048076067 | 0.697704523   | 4  |
| ENSRNOG00000016330 | -0.281649989 | 0.142446666 | 0.048015505 | 0.697704523   | 5  |
| ENSRNOG00000016892 | 0.135666438  | 0.0686211   | 0.048037474 | 0.697704523   | 16 |
| ENSRNOG00000017952 | -0.11677831  | 0.058971533 | 0.047675573 | 0.697704523   | 9  |
| ENSRNOG00000018836 | 0.145581247  | 0.073596012 | 0.04791593  | 0.697704523   | 19 |
| ENSRNOG00000028956 | 0.154213638  | 0.077982812 | 0.047981337 | 0.697704523   | 7  |
| ENSRNOG00000036866 | -0.191981112 | 0.097015838 | 0.047831364 | 0.697704523   | 1  |

|                    |              |             |             |             |            |
|--------------------|--------------|-------------|-------------|-------------|------------|
| ENSRNOG00000059714 | -0.152972419 | 0.077314716 | 0.047864673 | 0.697704523 | 6          |
| ENSRNOG00000004027 | 0.132909067  | 0.067322015 | 0.048355723 | 0.698976412 | 13         |
| ENSRNOG00000007699 | -0.179616525 | 0.090980936 | 0.048356555 | 0.698976412 | 6          |
| ENSRNOG00000020383 | 0.140918314  | 0.071349842 | 0.04826437  | 0.698976412 | 7          |
| ENSRNOG00000037302 | -0.228879913 | 0.115871695 | 0.048235528 | 0.698976412 | 3          |
| ENSRNOG00000003743 | -0.141515934 | 0.07174699  | 0.048560512 | 0.699442046 | 13         |
| ENSRNOG00000006684 | -0.243246407 | 0.123326965 | 0.048567383 | 0.699442046 | 8          |
| ENSRNOG00000008798 | -0.144337193 | 0.073184243 | 0.048581745 | 0.699442046 | 10         |
| ENSRNOG00000046227 | 0.134780648  | 0.06831273  | 0.048496176 | 0.699442046 | 5          |
| ENSRNOG00000008689 | -0.256085141 | 0.129916992 | 0.048707371 | 0.700555023 | 10         |
| ENSRNOG00000015079 | 0.121862132  | 0.061843898 | 0.048783444 | 0.700953788 | 5          |
| ENSRNOG00000061540 | 0.749740288  | 0.380601619 | 0.048851893 | 0.701242315 | KL568097.1 |
| ENSRNOG00000020130 | 0.138773275  | 0.070485246 | 0.048972927 | 0.702284373 | 1          |
| ENSRNOG00000019014 | 0.164869302  | 0.08378944  | 0.049106934 | 0.703410512 | 18         |
| ENSRNOG00000052802 | 0.126210151  | 0.064153953 | 0.049148493 | 0.703410512 | 1          |
| ENSRNOG00000014160 | -0.131827025 | 0.067046631 | 0.049275618 | 0.703840303 | 1          |
| ENSRNOG00000020636 | 0.12916098   | 0.065686318 | 0.0492605   | 0.703840303 | 1          |
| ENSRNOG00000018345 | -0.151494795 | 0.077084709 | 0.0493792   | 0.704625626 | 19         |
| ENSRNOG00000049641 | -0.127553374 | 0.064935585 | 0.049494591 | 0.705577763 | 13         |
| ENSRNOG00000048870 | 0.147137554  | 0.074924252 | 0.049551263 | 0.705691759 | 3          |
| ENSRNOG00000012004 | 0.183174337  | 0.093408744 | 0.049879285 | 0.706891369 | 5          |
| ENSRNOG00000013393 | -0.143403092 | 0.073119845 | 0.049854975 | 0.706891369 | 2          |
| ENSRNOG00000020060 | 0.152847028  | 0.077896213 | 0.04974058  | 0.706891369 | 1          |
| ENSRNOG00000024142 | -0.162577265 | 0.082892131 | 0.049842732 | 0.706891369 | 16         |
| ENSRNOG00000060728 | 0.11678688   | 0.059518603 | 0.049740228 | 0.706891369 | 7          |
| ENSRNOG00000051570 | -0.250382289 | 0.127738622 | 0.049982441 | 0.707622348 | 1          |

| Start position | End position | Gene Name    | Ensembl version |
|----------------|--------------|--------------|-----------------|
| 81991147       | 82027119     | Luc7l3       | GRCh38 - 102    |
| 151691514      | 151724654    | Rbm39        | GRCh38 - 102    |
| 65296778       | 65307995     | Clk1         | GRCh38 - 102    |
| 151616037      | 151625644    | Cpne1        | GRCh38 - 102    |
| 125169135      | 125213607    | Gpcpd1       | GRCh38 - 102    |
| 50597677       | 50618694     | Dld          | GRCh38 - 102    |
| 35991068       | 36017944     | Pnlsr        | GRCh38 - 102    |
| 279867034      | 279882663    | Pnliprp1     | GRCh38 - 102    |
| 143901280      | 143917575    | Zfp386       | GRCh38 - 102    |
| 61594620       | 61634510     | Sf3b1        | GRCh38 - 102    |
| 130548418      | 130550388    | Cyp8b1       | GRCh38 - 102    |
| 94530586       | 94607588     | Cstf3        | GRCh38 - 102    |
| 86785771       | 86810316     | Prpf39       | GRCh38 - 102    |
| 1217800        | 1238420      | Ddx3         | GRCh38 - 102    |
| 152226710      | 152259156    | LOC100910882 | GRCh38 - 102    |
| 28027054       | 28076664     | Ranbp2       | GRCh38 - 102    |
| 229003961      | 229019527    | Fam111a      | GRCh38 - 102    |
| 115601661      | 115690272    | Zfp638       | GRCh38 - 102    |
| 65781547       | 65800492     | Zfp329       | GRCh38 - 102    |
| 67368384       | 67390141     | LOC103690016 | GRCh38 - 102    |
| 110855000      | 110909807    | Kn1l         | GRCh38 - 102    |
| 60471962       | 60503803     | Anapc4       | GRCh38 - 102    |
| 135536413      | 135551990    | Prdx1        | GRCh38 - 102    |
| 108745895      | 108756130    | LOC108348062 | GRCh38 - 102    |
| 79736482       | 79801561     | Suco         | GRCh38 - 102    |
| 153101036      | 153114520    | Dsn1         | GRCh38 - 102    |
| 174013288      | 174111752    | Serpini1     | GRCh38 - 102    |
| 165432095      | 165442048    | Tardbp       | GRCh38 - 102    |
| 40217269       | 40306327     | Cep290       | GRCh38 - 102    |
| 36715565       | 36733133     | Clk4         | GRCh38 - 102    |
| 156403016      | 156427755    | LOC103690024 | GRCh38 - 102    |
| 68717519       | 68763850     | Smc2         | GRCh38 - 102    |
| 94793195       | 94810667     | AC120712.3   | GRCh38 - 102    |
| 35870232       | 35879910     | Hnrnp1       | GRCh38 - 102    |
| 89557273       | 89591175     | Ube2v2       | GRCh38 - 102    |
| 10327414       | 10375826     | Ass1         | GRCh38 - 102    |
| 169357517      | 169450219    | Acot7        | GRCh38 - 102    |
| 12240060       | 12246729     | Reep6        | GRCh38 - 102    |
| 71159869       | 71218902     | Hnf1b        | GRCh38 - 102    |
| 157435373      | 157439507    | Ptms         | GRCh38 - 102    |
| 71397383       | 71419223     | Tfrc         | GRCh38 - 102    |
| 3760867        | 3773340      | LOC103689945 | GRCh38 - 102    |
| 55258905       | 55268951     | Mvd          | GRCh38 - 102    |
| 173532803      | 173541847    | Eif3f        | GRCh38 - 102    |
| 170149029      | 170149418    | LOC103690002 | GRCh38 - 102    |
| 15425078       | 15428518     | LOC108348172 | GRCh38 - 102    |
| 74765385       | 74765599     | U3           | GRCh38 - 102    |
| 152552822      | 152619722    | LOC100911769 | GRCh38 - 102    |

|           |                         |              |
|-----------|-------------------------|--------------|
| 163664136 | 163702060 Cse1l         | GRCh38 - 102 |
| 223262852 | 223322585 Ptbp2         | GRCh38 - 102 |
| 255185629 | 255254307 Hectd2        | GRCh38 - 102 |
| 212570195 | 212579057 LOC100911186  | GRCh38 - 102 |
| 121725859 | 121739173 Slc20a1       | GRCh38 - 102 |
| 86683875  | 86690815 Nr1d1          | GRCh38 - 102 |
| 165601007 | 165629415 Smc4          | GRCh38 - 102 |
| 151044329 | 151072904 Stx12         | GRCh38 - 102 |
| 240977898 | 241046256 Smc5          | GRCh38 - 102 |
| 20213588  | 20217176 LOC100911515   | GRCh38 - 102 |
| 46314375  | 46329373 Med9           | GRCh38 - 102 |
| 54040721  | 54137660 Pcm1           | GRCh38 - 102 |
| 73600508  | 73602289 AABR07039307.1 | GRCh38 - 102 |
| 179584308 | 179704629 Gria2         | GRCh38 - 102 |
| 157747542 | 157759838 LOC100909712  | GRCh38 - 102 |
| 124880698 | 124884570 Pcna          | GRCh38 - 102 |
| 64101018  | 64113792 Mboat7         | GRCh38 - 102 |
| 13871213  | 13909188 Cep295         | GRCh38 - 102 |
| 77020402  | 77061667 Magt1          | GRCh38 - 102 |
| 4536180   | 4575646 Zc3h7a          | GRCh38 - 102 |
| 11401501  | 11406771 Eef2           | GRCh38 - 102 |
| 186640425 | 186641393 LOC100912427  | GRCh38 - 102 |
| 44936290  | 44972267 Capza2         | GRCh38 - 102 |
| 56271257  | 56276764 Eif4a1         | GRCh38 - 102 |
| 19101522  | 19134869 LOC108348096   | GRCh38 - 102 |
| 98228573  | 98231855 AABR07003176.1 | GRCh38 - 102 |
| 150587833 | 150603082 Ahcy          | GRCh38 - 102 |
| 98627372  | 98629936 Zfp17          | GRCh38 - 102 |
| 87818391  | 87847263 Nuf2           | GRCh38 - 102 |
| 77836196  | 77844189 Nop53          | GRCh38 - 102 |
| 81213364  | 81243757 Gas6           | GRCh38 - 102 |
| 37211316  | 37237848 Ccdc92         | GRCh38 - 102 |
| 71528988  | 71585908 Ogt            | GRCh38 - 102 |
| 137924293 | 137950075 Mta1          | GRCh38 - 102 |
| 225163391 | 225173995 Eef1g         | GRCh38 - 102 |
| 188661699 | 188672247 Adam15        | GRCh38 - 102 |
| 117304742 | 117307916 Grina         | GRCh38 - 102 |
| 120373604 | 120404910 Bub1          | GRCh38 - 102 |
| 114940053 | 115000691 Hook1         | GRCh38 - 102 |
| 68702820  | 68722472 Ivns1abp       | GRCh38 - 102 |
| 61136746  | 61174880 Dhx15          | GRCh38 - 102 |
| 42500929  | 42518855 Esco2          | GRCh38 - 102 |
| 263864331 | 263877821 Zranb2        | GRCh38 - 102 |
| 259641676 | 259674425 Aldh18a1      | GRCh38 - 102 |
| 13537033  | 13542077 Atp6v0c        | GRCh38 - 102 |
| 214039481 | 214074663 Chid1         | GRCh38 - 102 |
| 86514214  | 86530701 LOC103693776   | GRCh38 - 102 |
| 91878633  | 92008082 Nsf            | GRCh38 - 102 |
| 82407598  | 82418425 LOC100910438   | GRCh38 - 102 |
| 89511191  | 89524892 Mcm4           | GRCh38 - 102 |

|           |                         |              |
|-----------|-------------------------|--------------|
| 6288267   | 6298213 Srsf3           | GRCh38 - 102 |
| 119626637 | 119631425 Mpst          | GRCh38 - 102 |
| 64898459  | 64923012 Sgo2           | GRCh38 - 102 |
| 104611026 | 104615302 Srsf5         | GRCh38 - 102 |
| 27130172  | 27141881 Cct8           | GRCh38 - 102 |
| 35678240  | 35858390 Ptpn4          | GRCh38 - 102 |
| 114186853 | 114222516 Tubgcp5       | GRCh38 - 102 |
| 117335212 | 117354480 Slc24a5       | GRCh38 - 102 |
| 129548416 | 129569470 Uba3          | GRCh38 - 102 |
| 19792838  | 19798894 Babam1         | GRCh38 - 102 |
| 34051993  | 34094698 Morc3          | GRCh38 - 102 |
| 48292273  | 48351084 Svop           | GRCh38 - 102 |
| 26084903  | 26090094 Prdx2          | GRCh38 - 102 |
| 117354382 | 117389561 Myef2         | GRCh38 - 102 |
| 81814261  | 81854605 Syt13          | GRCh38 - 102 |
| 103673411 | 103770947 Atr           | GRCh38 - 102 |
| 94863282  | 94922017 Cep162         | GRCh38 - 102 |
| 30683640  | 30714495 Prpf4b         | GRCh38 - 102 |
| 41559487  | 41567013 Zfp612         | GRCh38 - 102 |
| 177351518 | 177371468 Pcmdt2        | GRCh38 - 102 |
| 187770160 | 187779675 Arl6ip1       | GRCh38 - 102 |
| 253221812 | 253275490 Kif20b        | GRCh38 - 102 |
| 39257586  | 39259728 Nip7           | GRCh38 - 102 |
| 117800628 | 117814658 LOC103690006  | GRCh38 - 102 |
| 103251986 | 103366264 Cntln         | GRCh38 - 102 |
| 167538263 | 167562688 Rrm1          | GRCh38 - 102 |
| 69237857  | 69242028 Zfp703         | GRCh38 - 102 |
| 108007724 | 108049660 Xpo1          | GRCh38 - 102 |
| 153260930 | 153264669 Rsrp1         | GRCh38 - 102 |
| 1652895   | 1672021 Zfp367          | GRCh38 - 102 |
| 6609668   | 6634595 Tkt             | GRCh38 - 102 |
| 144536729 | 144620731 Rad18         | GRCh38 - 102 |
| 251235508 | 251387002 Atad1         | GRCh38 - 102 |
| 119839016 | 119871382 Ndc80         | GRCh38 - 102 |
| 25946979  | 25949528 Gadd45gip1     | GRCh38 - 102 |
| 36941233  | 36995138 Smc6           | GRCh38 - 102 |
| 159902441 | 159965003 Hnf4a         | GRCh38 - 102 |
| 169446805 | 169534896 Trim5         | GRCh38 - 102 |
| 76002275  | 76022813 Echdc3         | GRCh38 - 102 |
| 41171486  | 41212072 Ppp1r3a        | GRCh38 - 102 |
| 4325875   | 4346769 Impact          | GRCh38 - 102 |
| 45078556  | 45097013 Zkscan8        | GRCh38 - 102 |
| 36918843  | 36946708 Mphosph8       | GRCh38 - 102 |
| 235341365 | 235353967 LOC103689977  | GRCh38 - 102 |
| 15850985  | 15852930 AABR07055919.1 | GRCh38 - 102 |
| 48132414  | 48173971 Snx2           | GRCh38 - 102 |
| 10160     | 11537 Mt-nd4            | GRCh38 - 102 |
| 22009011  | 22021851 LOC102550456   | GRCh38 - 102 |
| 42620006  | 42659184 Hs6st1         | GRCh38 - 102 |
| 40466495  | 40498752 Aldh2          | GRCh38 - 102 |

|           |                       |              |
|-----------|-----------------------|--------------|
| 90731148  | 90749217 Adam11       | GRCh38 - 102 |
| 136526496 | 136853957 Nell2       | GRCh38 - 102 |
| 138866761 | 138885556 Crbn        | GRCh38 - 102 |
| 78905380  | 78924181 Tra2a        | GRCh38 - 102 |
| 7076759   | 7108328 Smarcd3       | GRCh38 - 102 |
| 264864351 | 264893294 Lrrc40      | GRCh38 - 102 |
| 189878168 | 189880743 Snapin      | GRCh38 - 102 |
| 57206613  | 57258295 Nup155       | GRCh38 - 102 |
| 83206004  | 83228194 Ankrd10      | GRCh38 - 102 |
| 65279675  | 65291651 Bzw1         | GRCh38 - 102 |
| 1702696   | 1731210 Lrp11         | GRCh38 - 102 |
| 219615420 | 219628997 Trmt13      | GRCh38 - 102 |
| 70173944  | 70184337 Ska1         | GRCh38 - 102 |
| 118207862 | 118235218 Tia1        | GRCh38 - 102 |
| 43971474  | 44078336 Cfdp1        | GRCh38 - 102 |
| 11752412  | 11754508 Oaz1         | GRCh38 - 102 |
| 187842885 | 187863516 Lmna        | GRCh38 - 102 |
| 51888634  | 51946715 Pot1         | GRCh38 - 102 |
| 221425987 | 221431713 Tm7sf2      | GRCh38 - 102 |
| 101687855 | 101692846 Dbp         | GRCh38 - 102 |
| 107495366 | 107548269 Cep70       | GRCh38 - 102 |
| 44468784  | 44642050 Dmxi1        | GRCh38 - 102 |
| 178354890 | 178366685 Ppid        | GRCh38 - 102 |
| 50282084  | 50362344 Zfp292       | GRCh38 - 102 |
| 33809807  | 33841499 Srek1        | GRCh38 - 102 |
| 2307808   | 2316722 Cyp1b1        | GRCh38 - 102 |
| 53109684  | 53114858 Selenop      | GRCh38 - 102 |
| 78407414  | 78421024 LOC103690028 | GRCh38 - 102 |
| 87312203  | 87421659 Adcy1        | GRCh38 - 102 |
| 88131554  | 88162583 Catsperg     | GRCh38 - 102 |
| 24467964  | 24487396 Elmod2       | GRCh38 - 102 |
| 97984862  | 98026052 Atad2        | GRCh38 - 102 |
| 207993895 | 208020454 Mki67       | GRCh38 - 102 |
| 39001498  | 39054142 Rad50        | GRCh38 - 102 |
| 61268248  | 61276755 LOC102552527 | GRCh38 - 102 |
| 119361655 | 119405453 Sppl2a      | GRCh38 - 102 |
| 224957517 | 224970727 Nxf1        | GRCh38 - 102 |
| 226030938 | 226033228 Fth1        | GRCh38 - 102 |
| 25803262  | 25813467 Trmt1        | GRCh38 - 102 |
| 60126624  | 60570058 Scaper       | GRCh38 - 102 |
| 79931156  | 79959461 Sympk        | GRCh38 - 102 |
| 69899128  | 69927938 Ncapg        | GRCh38 - 102 |
| 11013681  | 11018160 Tle5         | GRCh38 - 102 |
| 12335432  | 12355091 Cep57        | GRCh38 - 102 |
| 36638457  | 36642734 Ubc          | GRCh38 - 102 |
| 274309758 | 274352854 Smc3        | GRCh38 - 102 |
| 23998411  | 24046814 Por          | GRCh38 - 102 |
| 50872492  | 50884596 Poglut2      | GRCh38 - 102 |
| 27365376  | 27372372 Mterf1       | GRCh38 - 102 |
| 48665652  | 48666981 H2ax         | GRCh38 - 102 |

|           |                          |              |
|-----------|--------------------------|--------------|
| 12355767  | 12374689 Fam76b          | GRCh38 - 102 |
| 119524039 | 119531387 Epm2aip1       | GRCh38 - 102 |
| 8207223   | 8236292 Oxnad1           | GRCh38 - 102 |
| 34997008  | 35005287 LOC103689949    | GRCh38 - 102 |
| 75996643  | 76034083 Srp54a          | GRCh38 - 102 |
| 75067297  | 75067723 LOC498555       | GRCh38 - 102 |
| 23534     | 32066 Rasl10b            | GRCh38 - 102 |
| 39661968  | 39798302 Gabra2          | GRCh38 - 102 |
| 35729628  | 35730599 Rps4x           | GRCh38 - 102 |
| 91961020  | 91966418 NEWGENE_1310561 | GRCh38 - 102 |
| 43001948  | 43109071 Hpcal1          | GRCh38 - 102 |
| 41079444  | 41138505 Neil3           | GRCh38 - 102 |
| 30664639  | 30668414 Taf9            | GRCh38 - 102 |
| 16694792  | 16752205 Crebrf          | GRCh38 - 102 |
| 34304425  | 34314345 Ipo4            | GRCh38 - 102 |
| 58164198  | 58219790 Tbc1d15         | GRCh38 - 102 |
| 20546159  | 20621051 Tnfrsf21        | GRCh38 - 102 |
| 2903492   | 3004553 Ttc37            | GRCh38 - 102 |
| 117786207 | 117788550 MGC94207       | GRCh38 - 102 |
| 18061     | 19999 LOC103694872       | GRCh38 - 102 |
| 112154759 | 112159458 Tex13b         | GRCh38 - 102 |
| 216481436 | 216509827 Rnpc3          | GRCh38 - 102 |
| 35850398  | 36000906 Plxnc1          | GRCh38 - 102 |
| 78368867  | 78379346 Alad            | GRCh38 - 102 |
| 86950557  | 86962578 Igfbp4          | GRCh38 - 102 |
| 119307176 | 119321500 Myl12b         | GRCh38 - 102 |
| 102900286 | 102909707 Ldha           | GRCh38 - 102 |
| 9870      | 10166 Mt-nd4l            | GRCh38 - 102 |
| 154684935 | 154722314 Fmr1           | GRCh38 - 102 |
| 143707237 | 143720595 Tns2           | GRCh38 - 102 |
| 34255305  | 34288139 Trim23          | GRCh38 - 102 |
| 155649217 | 155672579 Wnt4           | GRCh38 - 102 |
| 94980928  | 94988461 Ddx5            | GRCh38 - 102 |
| 43133218  | 43143973 Uchl1           | GRCh38 - 102 |
| 40171963  | 40217056 Tmtc3           | GRCh38 - 102 |
| 128161895 | 128268322 Thoc2          | GRCh38 - 102 |
| 40320581  | 40375605 Anxa6           | GRCh38 - 102 |
| 157181795 | 157222996 Lpcat3         | GRCh38 - 102 |
| 11838639  | 11873984 Ap3d1           | GRCh38 - 102 |
| 44365405  | 44411004 Cdca2           | GRCh38 - 102 |
| 129860114 | 129863441 Pim3           | GRCh38 - 102 |
| 117617533 | 117631716 Dusp11         | GRCh38 - 102 |
| 75335146  | 75341197 Srsf1           | GRCh38 - 102 |
| 33752     | 57957 LOC103694876       | GRCh38 - 102 |
| 44141422  | 44174583 Tesc            | GRCh38 - 102 |
| 91173473  | 91178801 Pdcd5           | GRCh38 - 102 |
| 113918629 | 113960101 Ctdspl2        | GRCh38 - 102 |
| 91368111  | 91405993 Ttk             | GRCh38 - 102 |
| 65478496  | 65488702 Ndufb3          | GRCh38 - 102 |
| 3051449   | 3105531 Tasor            | GRCh38 - 102 |

|           |           |                |              |
|-----------|-----------|----------------|--------------|
| 235049335 | 235177275 | LOC108348190   | GRCh38 - 102 |
| 22750336  | 22774903  | Ldlr           | GRCh38 - 102 |
| 77203525  | 77322690  | Nfatc1         | GRCh38 - 102 |
| 88457594  | 88465110  | Zfp260         | GRCh38 - 102 |
| 9961021   | 9968486   | Tubb4a         | GRCh38 - 102 |
| 34290199  | 34313094  | Ppwd1          | GRCh38 - 102 |
| 34070632  | 34105610  | Prmt9          | GRCh38 - 102 |
| 9834242   | 9837303   | Prelid1        | GRCh38 - 102 |
| 17817721  | 17823243  | Hsp90ab1       | GRCh38 - 102 |
| 152078220 | 152122684 | Rps6ka1        | GRCh38 - 102 |
| 217602698 | 217638152 | Cttn           | GRCh38 - 102 |
| 157125998 | 157136829 | C1r            | GRCh38 - 102 |
| 157822840 | 157829241 | Ltbr           | GRCh38 - 102 |
| 87260835  | 87468288  | Sipa1l3        | GRCh38 - 102 |
| 118570503 | 118628651 | Scap           | GRCh38 - 102 |
| 21862313  | 21902762  | Dmtf1          | GRCh38 - 102 |
| 117215064 | 117229873 | Smyd5          | GRCh38 - 102 |
| 67100280  | 67104353  | AABR07060318.1 | GRCh38 - 102 |
| 95072112  | 95143142  | Usp40          | GRCh38 - 102 |
| 198043073 | 198045154 | Nupr1l1        | GRCh38 - 102 |
| 36077617  | 36080191  | Hmgb2          | GRCh38 - 102 |
| 55441572  | 55510460  | Cbfa2t3        | GRCh38 - 102 |
| 13965121  | 13972547  | Susd2          | GRCh38 - 102 |
| 152785844 | 152824547 | Dhx36          | GRCh38 - 102 |
| 119889371 | 119889949 | H1f10          | GRCh38 - 102 |
| 57855416  | 57879239  | Cpa2           | GRCh38 - 102 |
| 60307148  | 60327236  | Eri1           | GRCh38 - 102 |
| 31728373  | 31749647  | Nr3c1          | GRCh38 - 102 |
| 47103314  | 47138128  | Rnf10          | GRCh38 - 102 |
| 52092859  | 52111363  | Rnpep          | GRCh38 - 102 |
| 104630573 | 104637823 | Wbp2           | GRCh38 - 102 |
| 154205402 | 154213801 | Srsf10         | GRCh38 - 102 |
| 25656983  | 25752792  | Relch          | GRCh38 - 102 |
| 20020444  | 20025930  | Pgls           | GRCh38 - 102 |
| 100848598 | 100888107 | Thap4          | GRCh38 - 102 |
| 214434626 | 214439720 | Pnpla2         | GRCh38 - 102 |
| 222310920 | 222451484 | Macrocl1       | GRCh38 - 102 |
| 55094585  | 55150686  | Zfpm1          | GRCh38 - 102 |
| 6945260   | 6946542   | AABR07044473.1 | GRCh38 - 102 |
| 60701256  | 60702538  | AABR07070238.3 | GRCh38 - 102 |
| 71331052  | 71340229  | Glul           | GRCh38 - 102 |
| 20264418  | 20278261  | Atn1           | GRCh38 - 102 |
| 168474633 | 168475915 | AABR07050530.1 | GRCh38 - 102 |
| 88182155  | 88192969  | LOC103689986   | GRCh38 - 102 |
| 12906899  | 12908181  | AC128394.1     | GRCh38 - 102 |
| 15782477  | 15860624  | Bclaf1         | GRCh38 - 102 |
| 81757983  | 81794580  | Tbccd1         | GRCh38 - 102 |
| 126164674 | 126191206 | Dhcr24         | GRCh38 - 102 |
| 18598880  | 18612147  | Rab11b         | GRCh38 - 102 |
| 55715744  | 55718670  | Arf5           | GRCh38 - 102 |

|           |                          |              |
|-----------|--------------------------|--------------|
| 89266710  | 89339323 Rbm26           | GRCh38 - 102 |
| 156011002 | 156014527 Ssr3           | GRCh38 - 102 |
| 155295314 | 155316495 Epha8          | GRCh38 - 102 |
| 23480266  | 23510959 Ppp6c           | GRCh38 - 102 |
| 52917124  | 52985261 Slc12a2         | GRCh38 - 102 |
| 82446633  | 82461903 Ptpn            | GRCh38 - 102 |
| 91042635  | 91048483 Tbc1            | GRCh38 - 102 |
| 150761329 | 150782493 Dynlrb1        | GRCh38 - 102 |
| 2834355   | 2891253 Arsk             | GRCh38 - 102 |
| 17633766  | 17663589 Impad1          | GRCh38 - 102 |
| 248249468 | 248263168 Gbp4           | GRCh38 - 102 |
| 38967238  | 38985036 Serinc1         | GRCh38 - 102 |
| 10110389  | 10155302 Mllt1           | GRCh38 - 102 |
| 60336061  | 60363936 LOC685767       | GRCh38 - 102 |
| 195864391 | 195867147 AABR07005752.1 | GRCh38 - 102 |
| 142332607 | 142376370 Mtf1           | GRCh38 - 102 |
| 156215417 | 156318671 Ece1           | GRCh38 - 102 |
| 73561450  | 73621070 Ctnnal1         | GRCh38 - 102 |
| 138855641 | 138869217 Trnt1          | GRCh38 - 102 |
| 57613879  | 57618527 C1qbp           | GRCh38 - 102 |
| 58015940  | 58120045 Atm             | GRCh38 - 102 |
| 156983915 | 157009674 Pex5           | GRCh38 - 102 |
| 10662021  | 10695557 Glud1           | GRCh38 - 102 |
| 34598492  | 34738791 Ttc3            | GRCh38 - 102 |
| 45188248  | 45207065 Zscan26         | GRCh38 - 102 |
| 48863418  | 48897795 Primpol         | GRCh38 - 102 |
| 170879973 | 170955399 Bmp7           | GRCh38 - 102 |
| 80159364  | 80167677 Pnn             | GRCh38 - 102 |
| 264160129 | 264172729 Scd            | GRCh38 - 102 |
| 88055841  | 88060561 Krt19           | GRCh38 - 102 |
| 218816841 | 218920094 Lrp5           | GRCh38 - 102 |
| 16566688  | 16581078 Pex6            | GRCh38 - 102 |
| 32281207  | 32297190 Clptm1l         | GRCh38 - 102 |
| 30972907  | 31071371 Diaph1          | GRCh38 - 102 |
| 82423277  | 82452281 Bckdha          | GRCh38 - 102 |
| 89366899  | 89374516 Vat1            | GRCh38 - 102 |
| 104049386 | 104080631 Lyplal1        | GRCh38 - 102 |
| 117602041 | 117605141 Fbxl6          | GRCh38 - 102 |
| 135394016 | 135397591 Tmem69         | GRCh38 - 102 |
| 21511839  | 21523540 Zfp266          | GRCh38 - 102 |
| 37896780  | 37957412 LOC102549842    | GRCh38 - 102 |
| 134305    | 140555 Vps37c            | GRCh38 - 102 |
| 132032944 | 132103927 Kif15          | GRCh38 - 102 |
| 62382608  | 62698830 Pola1           | GRCh38 - 102 |
| 104966124 | 104995725 Slc25a36       | GRCh38 - 102 |
| 201055644 | 201329622 Tacc2          | GRCh38 - 102 |
| 185210922 | 185326314 Pik3c2a        | GRCh38 - 102 |
| 9475538   | 9519595 Ddx46            | GRCh38 - 102 |
| 106604379 | 106617597 Mrps22         | GRCh38 - 102 |
| 85802605  | 85895613 LOC100911837    | GRCh38 - 102 |

|           |                         |              |
|-----------|-------------------------|--------------|
| 37599728  | 37647631 Rif1           | GRCh38 - 102 |
| 64721424  | 64722492 AABR07038948.2 | GRCh38 - 102 |
| 48726045  | 48922983 Arap2          | GRCh38 - 102 |
| 70452579  | 70459880 B4galnt1       | GRCh38 - 102 |
| 11646269  | 11648322 Gadd45b        | GRCh38 - 102 |
| 83307684  | 83421612 Hcrtr2         | GRCh38 - 102 |
| 221430648 | 221440467 Vps51         | GRCh38 - 102 |
| 109519134 | 109520846 Actg1         | GRCh38 - 102 |
| 84838264  | 84845288 LOC102552659   | GRCh38 - 102 |
| 83816569  | 83819689 AABR07002768.1 | GRCh38 - 102 |
| 1937041   | 1957579 Tmed11          | GRCh38 - 102 |
| 41470557  | 41485122 Ddx54          | GRCh38 - 102 |
| 107394486 | 107405564 Morf4l2       | GRCh38 - 102 |
| 78912361  | 78957212 Klhl20         | GRCh38 - 102 |
| 144291974 | 144363947 Ncapg2        | GRCh38 - 102 |
| 150547467 | 150616895 Ankrd26       | GRCh38 - 102 |
| 122803772 | 122808558 Nop56         | GRCh38 - 102 |
| 26311094  | 26361221 Washc4         | GRCh38 - 102 |
| 90392143  | 90483077 Phip           | GRCh38 - 102 |
| 116189862 | 116219750 Sec62         | GRCh38 - 102 |
| 83310884  | 83335960 Api5           | GRCh38 - 102 |
| 65350627  | 65387169 Orc2           | GRCh38 - 102 |
| 59532389  | 59539920 Psma4          | GRCh38 - 102 |
| 72294153  | 72311856 Epn1           | GRCh38 - 102 |
| 120785495 | 120817377 Podxl2        | GRCh38 - 102 |
| 10537365  | 10554989 Cltb           | GRCh38 - 102 |
| 28361283  | 28390717 Matr3          | GRCh38 - 102 |
| 89394803  | 89454681 Brca1          | GRCh38 - 102 |
| 12516702  | 12549389 Tmem161b       | GRCh38 - 102 |
| 87204175  | 87207264 Slc25a1        | GRCh38 - 102 |
| 54377374  | 54404612 Cip2a          | GRCh38 - 102 |
| 15405860  | 15429322 Nol8           | GRCh38 - 102 |
| 215214853 | 215241723 LOC103690160  | GRCh38 - 102 |
| 38727048  | 38773607 Zfp600         | GRCh38 - 102 |
| 58366192  | 58423581 Zfc3h1         | GRCh38 - 102 |
| 78345754  | 78655856 Tcf12          | GRCh38 - 102 |
| 81373048  | 81379871 Eif4a2         | GRCh38 - 102 |
| 18152659  | 18167517 Zfp68          | GRCh38 - 102 |
| 20578131  | 20589290 Ssbp4          | GRCh38 - 102 |
| 2880518   | 2886465 Srsf7           | GRCh38 - 102 |
| 120512899 | 120570355 Fxr1          | GRCh38 - 102 |
| 57669530  | 57671080 LOC691995      | GRCh38 - 102 |
| 59646015  | 59688692 Sp3            | GRCh38 - 102 |
| 34374158  | 34586755 Adamts6        | GRCh38 - 102 |
| 12851739  | 12874215 Hcn2           | GRCh38 - 102 |
| 79538911  | 79912333 Sorcs2         | GRCh38 - 102 |
| 24434872  | 24446406 Ccne2          | GRCh38 - 102 |
| 49465968  | 49484985 Ufsp2          | GRCh38 - 102 |
| 51908448  | 51934702 Ulk1           | GRCh38 - 102 |
| 10400366  | 10413995 Ddx3x          | GRCh38 - 102 |

|           |                        |              |
|-----------|------------------------|--------------|
| 30175018  | 30246010 Mccc2         | GRCh38 - 102 |
| 81694808  | 81726821 Cyb5a         | GRCh38 - 102 |
| 198383201 | 198403544 Sez6l2       | GRCh38 - 102 |
| 110148600 | 110182408 Csnk1d       | GRCh38 - 102 |
| 29012007  | 29163134 Atad2b        | GRCh38 - 102 |
| 2658267   | 2700977 Mtf2           | GRCh38 - 102 |
| 86414949  | 86613327 LOC103693780  | GRCh38 - 102 |
| 183695481 | 183729569 Copb1        | GRCh38 - 102 |
| 54291251  | 54386129 Mtus1         | GRCh38 - 102 |
| 44475970  | 44515739 Ccnt2         | GRCh38 - 102 |
| 55028125  | 55037604 Sdhd          | GRCh38 - 102 |
| 125857046 | 125893168 RGD1304694   | GRCh38 - 102 |
| 105147153 | 105198797 Cenpi        | GRCh38 - 102 |
| 82571269  | 82628709 Speg          | GRCh38 - 102 |
| 19866022  | 19872774 Abhd8         | GRCh38 - 102 |
| 5106890   | 5113112 Csnk2b         | GRCh38 - 102 |
| 38024519  | 38053085 Hip1r         | GRCh38 - 102 |
| 13914114  | 13924531 Slc29a4       | GRCh38 - 102 |
| 31806618  | 31837763 Son           | GRCh38 - 102 |
| 39964588  | 40049354 Gabrg1        | GRCh38 - 102 |
| 57472315  | 57530987 Ube2r2        | GRCh38 - 102 |
| 9972537   | 10012043 Csnk2a2       | GRCh38 - 102 |
| 52031842  | 52047816 LOC100174910  | GRCh38 - 102 |
| 1142782   | 1176974 Thoc1          | GRCh38 - 102 |
| 116502937 | 116532169 Rbm5         | GRCh38 - 102 |
| 226030875 | 226049929 Best1        | GRCh38 - 102 |
| 114111580 | 114132492 Ddx11        | GRCh38 - 102 |
| 1305016   | 1421685 Ercc6l2        | GRCh38 - 102 |
| 86901007  | 86932154 Top2a         | GRCh38 - 102 |
| 47079234  | 47113993 Zbtb11        | GRCh38 - 102 |
| 28370373  | 28381311 LOC108348276  | GRCh38 - 102 |
| 144307509 | 144322240 LOC100912282 | GRCh38 - 102 |
| 15546823  | 15582556 RGD1561662    | GRCh38 - 102 |
| 252263386 | 252296051 Ssx2ip       | GRCh38 - 102 |
| 173256637 | 173276169 Aurkaip1     | GRCh38 - 102 |
| 216154002 | 216156409 Ascl2        | GRCh38 - 102 |
| 94758800  | 94774569 Dscc1         | GRCh38 - 102 |
| 86329012  | 86358453 Cdc45         | GRCh38 - 102 |
| 22898527  | 22914177 Dbf4          | GRCh38 - 102 |
| 23941448  | 23954431 Mdh2          | GRCh38 - 102 |
| 45401403  | 45459821 Tbc1d23       | GRCh38 - 102 |
| 46570996  | 46593009 Srebf1        | GRCh38 - 102 |
| 248715281 | 248727741 Gtf2b        | GRCh38 - 102 |
| 62150251  | 62213048 Zfr           | GRCh38 - 102 |
| 96621586  | 97030163 Agap1         | GRCh38 - 102 |
| 52823096  | 52828134 Rbm7          | GRCh38 - 102 |
| 28486617  | 28517353 Hnrnpc        | GRCh38 - 102 |
| 1872848   | 1879279 Ctsl           | GRCh38 - 102 |
| 72092194  | 72122497 G2e3          | GRCh38 - 102 |
| 139453774 | 139528162 Slc7a11      | GRCh38 - 102 |

|           |                         |              |
|-----------|-------------------------|--------------|
| 68634929  | 68645172 Ssbp1          | GRCh38 - 102 |
| 201981357 | 202021008 Acadsb        | GRCh38 - 102 |
| 7984019   | 8066868 Lrp3            | GRCh38 - 102 |
| 28898649  | 28932641 Dram1          | GRCh38 - 102 |
| 142575672 | 142684114 Scn8a         | GRCh38 - 102 |
| 267483145 | 267509350 Sfr1          | GRCh38 - 102 |
| 135446962 | 135472116 Nasp          | GRCh38 - 102 |
| 71652354  | 71670239 Casp2          | GRCh38 - 102 |
| 264837472 | 264864265 Srsf11        | GRCh38 - 102 |
| 40050734  | 40058822 Spcs3          | GRCh38 - 102 |
| 54212767  | 54284872 Glis           | GRCh38 - 102 |
| 29831314  | 29856875 Psap           | GRCh38 - 102 |
| 2046472   | 2050565 Zfp358          | GRCh38 - 102 |
| 31124018  | 31140711 Fancb          | GRCh38 - 102 |
| 111422267 | 111452971 Nusap1        | GRCh38 - 102 |
| 68626185  | 68637416 Yipf6          | GRCh38 - 102 |
| 20633632  | 20658100 Rars1          | GRCh38 - 102 |
| 94388430  | 94406949 Ccdc47         | GRCh38 - 102 |
| 154310453 | 154314955 Gale          | GRCh38 - 102 |
| 52265930  | 52285029 Sypl1          | GRCh38 - 102 |
| 28441301  | 28551784 Vps50          | GRCh38 - 102 |
| 120651881 | 120672359 Csnk1e        | GRCh38 - 102 |
| 32132347  | 32158538 Nqo2           | GRCh38 - 102 |
| 266255797 | 266270694 Trim8         | GRCh38 - 102 |
| 5118002   | 5120332 G4              | GRCh38 - 102 |
| 47904719  | 47919400 Mvk            | GRCh38 - 102 |
| 132204604 | 132229969 Exosc7        | GRCh38 - 102 |
| 10965586  | 10967392 AABR07051431.1 | GRCh38 - 102 |
| 220114228 | 220119976 Ctsf          | GRCh38 - 102 |
| 119747911 | 119756765 Cnbp          | GRCh38 - 102 |
| 91448361  | 91462603 Lrp3           | GRCh38 - 102 |
| 190780236 | 190842324 Eef2k         | GRCh38 - 102 |
| 168009393 | 168035810 Tnfrsf9       | GRCh38 - 102 |
| 210685197 | 210688272 Gstm5         | GRCh38 - 102 |
| 123264694 | 123294880 Exosc9        | GRCh38 - 102 |
| 266781617 | 266794431 Ina           | GRCh38 - 102 |
| 70322755  | 70345005 Igfbp1         | GRCh38 - 102 |
| 86599220  | 86611188 Psmd3          | GRCh38 - 102 |
| 111269490 | 111325186 Rbm41         | GRCh38 - 102 |
| 150801289 | 150802935 Map1lc3a      | GRCh38 - 102 |
| 14983371  | 14984364 Sumo4          | GRCh38 - 102 |
| 81295024  | 81304181 Mapk8ip1       | GRCh38 - 102 |
| 20638579  | 20713128 Rhobtb1        | GRCh38 - 102 |
| 240396152 | 240454747 Cenpe         | GRCh38 - 102 |
| 99184564  | 99188431 Pycr2          | GRCh38 - 102 |
| 113570150 | 113618138 Ppp4r3b       | GRCh38 - 102 |
| 35934970  | 36062719 Galnt7         | GRCh38 - 102 |
| 22062050  | 22105710 Zfyve16        | GRCh38 - 102 |
| 1866080   | 1876613 Snrpd1          | GRCh38 - 102 |
| 123275881 | 123282214 Ccna2         | GRCh38 - 102 |

|           |                      |              |
|-----------|----------------------|--------------|
| 44810388  | 44897640 Hsd17b4     | GRCh38 - 102 |
| 84879973  | 84894805 Zfp780b-ps1 | GRCh38 - 102 |
| 20435101  | 20439206 Rab3a       | GRCh38 - 102 |
| 18970564  | 19055924 Cwf19l2     | GRCh38 - 102 |
| 53122322  | 53152866 Fgfr1op     | GRCh38 - 102 |
| 989240    | 1206096 AC241873.1   | GRCh38 - 102 |
| 11252296  | 11265865 Arpc1b      | GRCh38 - 102 |
| 124722628 | 124766044 Lamp2      | GRCh38 - 102 |
| 4414276   | 4422283 Atf6b        | GRCh38 - 102 |
| 4993560   | 5008262 Vars1        | GRCh38 - 102 |
| 103395511 | 103417358 Gprc5c     | GRCh38 - 102 |
| 25832072  | 25847994 Mat2b       | GRCh38 - 102 |
| 108132499 | 108178609 Cenpf      | GRCh38 - 102 |
| 73423397  | 73460935 Qsox1       | GRCh38 - 102 |
| 52687868  | 52717809 Wdr75       | GRCh38 - 102 |
| 2216623   | 2280777 Rmdn2        | GRCh38 - 102 |
| 56625561  | 56653111 Calu        | GRCh38 - 102 |
| 13033918  | 13097341 Rb1cc1      | GRCh38 - 102 |
| 123381077 | 123438603 Srebf2     | GRCh38 - 102 |
| 48501472  | 48504511 Pnrc1       | GRCh38 - 102 |
| 33890349  | 33943211 C1galt1     | GRCh38 - 102 |
| 81498022  | 81512807 Chst1       | GRCh38 - 102 |
| 82776746  | 82833773 Tax1bp1     | GRCh38 - 102 |
| 138715570 | 138757111 Sec23b     | GRCh38 - 102 |
| 110669312 | 110690173 Ivd        | GRCh38 - 102 |
| 52122085  | 52156472 Nampt       | GRCh38 - 102 |
| 12708015  | 12793711 Palm        | GRCh38 - 102 |
| 157468626 | 157494008 Pcf11      | GRCh38 - 102 |
| 37835580  | 37926715 Xpo4        | GRCh38 - 102 |
| 80331227  | 80333326 Cycs        | GRCh38 - 102 |
| 48937456  | 49003246 Acsl1       | GRCh38 - 102 |
| 56187020  | 56198449 Tp53        | GRCh38 - 102 |
| 62703779  | 62773923 Nup205      | GRCh38 - 102 |
| 33108671  | 33114829 Lrp10       | GRCh38 - 102 |
| 30874418  | 30917882 Echdc1      | GRCh38 - 102 |
| 81244469  | 81257897 Cbx3        | GRCh38 - 102 |
| 73319710  | 73462972 Map2        | GRCh38 - 102 |
| 142118917 | 142133627 Unc45a     | GRCh38 - 102 |
| 43266739  | 43294889 Mier3       | GRCh38 - 102 |
| 49610548  | 49617065 Yae1        | GRCh38 - 102 |
| 56982821  | 57001665 Ermard      | GRCh38 - 102 |
| 149703848 | 149870413 Cdk5rap1   | GRCh38 - 102 |
| 116587815 | 116679973 Ube3a      | GRCh38 - 102 |
| 53629839  | 53713408 Arid4b      | GRCh38 - 102 |
| 37481782  | 37525762 Atp6v0d1    | GRCh38 - 102 |
| 16643619  | 16647458 Mrpl2       | GRCh38 - 102 |
| 37905864  | 37907714 Ctrl        | GRCh38 - 102 |
| 143583675 | 143589556 Ramac      | GRCh38 - 102 |
| 225005017 | 225014538 Ttc9c      | GRCh38 - 102 |
| 166428761 | 166457509 Stard10    | GRCh38 - 102 |

|           |                          |              |
|-----------|--------------------------|--------------|
| 86948918  | 86971952 Sirt2           | GRCh38 - 102 |
| 103832838 | 103848035 Fads6          | GRCh38 - 102 |
| 198006316 | 198009830 Aph1a          | GRCh38 - 102 |
| 164343833 | 164366684 LOC100912618   | GRCh38 - 102 |
| 78080310  | 78133654 Sspo            | GRCh38 - 102 |
| 116933341 | 116936066 RGD1560795     | GRCh38 - 102 |
| 25041185  | 25052127 Zbed3           | GRCh38 - 102 |
| 220992770 | 221003249 Rela           | GRCh38 - 102 |
| 151553578 | 151563364 Ergic3         | GRCh38 - 102 |
| 70776046  | 70779249 Prss1           | GRCh38 - 102 |
| 130431213 | 130440703 Mapk8ip2       | GRCh38 - 102 |
| 109754004 | 109757550 Arhgdia        | GRCh38 - 102 |
| 37089940  | 37099004 N4bp3           | GRCh38 - 102 |
| 20217278  | 20219209 Spsb2           | GRCh38 - 102 |
| 183305813 | 183374195 Caprin2        | GRCh38 - 102 |
| 47894530  | 48036287 AABR07047789.1  | GRCh38 - 102 |
| 73390903  | 73413931 Zfp449          | GRCh38 - 102 |
| 23323936  | 23352668 Mmut            | GRCh38 - 102 |
| 45279162  | 45285060 Zscan12         | GRCh38 - 102 |
| 125189827 | 125277689 Parvb          | GRCh38 - 102 |
| 117789006 | 117790350 Nat8b          | GRCh38 - 102 |
| 82254453  | 82298404 LOC498265       | GRCh38 - 102 |
| 128996616 | 129001614 AABR07065448.1 | GRCh38 - 102 |
| 12574058  | 12574805 AC126486.5      | GRCh38 - 102 |
| 102648881 | 102870006 AABR07058158.1 | GRCh38 - 102 |
| 11055371  | 11061611 Mpnd            | GRCh38 - 102 |
| 130482493 | 130491998 Higd1a         | GRCh38 - 102 |
| 31096214  | 31202514 Lrrc20          | GRCh38 - 102 |
| 107156263 | 107164033 AABR07065078.1 | GRCh38 - 102 |
| 47117135  | 47131842 Tmem11          | GRCh38 - 102 |
| 49792273  | 50000535 Cmip            | GRCh38 - 102 |
| 219345918 | 219347728 Cdk2ap2        | GRCh38 - 102 |
| 15538872  | 15568638 Luc7l           | GRCh38 - 102 |
| 183896303 | 183905297 Resf1          | GRCh38 - 102 |
| 140708397 | 140727281 Mgst2          | GRCh38 - 102 |
| 20184245  | 20364714 Jarid2          | GRCh38 - 102 |
| 31094965  | 31098536 Rell2           | GRCh38 - 102 |
| 44033436  | 44126919 Mgat4a          | GRCh38 - 102 |
| 88543630  | 88574203 LOC100911576    | GRCh38 - 102 |
| 143346252 | 143453612 Atp11c         | GRCh38 - 102 |
| 48374096  | 48411170 Gabrr1          | GRCh38 - 102 |
| 117371659 | 117472198 Alms1          | GRCh38 - 102 |
| 97531083  | 97537086 Mad2l1          | GRCh38 - 102 |
| 221043119 | 221056417 Map3k11        | GRCh38 - 102 |
| 100677411 | 100710417 Ythdf3         | GRCh38 - 102 |
| 76056499  | 76079664 Ppp2r3c         | GRCh38 - 102 |
| 67762995  | 67774787 Zfp207          | GRCh38 - 102 |
| 20576377  | 20591549 Cdk1            | GRCh38 - 102 |
| 24324590  | 24341938 Pom121          | GRCh38 - 102 |
| 35726544  | 35736338 Mgat4b          | GRCh38 - 102 |

|           |                       |              |
|-----------|-----------------------|--------------|
| 38295365  | 38353461 Bclaf3       | GRCh38 - 102 |
| 10962330  | 10988137 Tle6         | GRCh38 - 102 |
| 55642070  | 55643923 Borcs6       | GRCh38 - 102 |
| 119999472 | 120027026 Card10      | GRCh38 - 102 |
| 164230852 | 164239250 Spata2      | GRCh38 - 102 |
| 93968855  | 94000863 Fbxo3        | GRCh38 - 102 |
| 237148941 | 237241350 Dkk2        | GRCh38 - 102 |
| 176565694 | 176581952 Pyroxd1     | GRCh38 - 102 |
| 76673990  | 76756147 Ptbp3        | GRCh38 - 102 |
| 15866237  | 15881327 Ninj1        | GRCh38 - 102 |
| 2806777   | 2832697 Rabl6         | GRCh38 - 102 |
| 220645672 | 220665603 Sf3b2       | GRCh38 - 102 |
| 90296141  | 90312386 Slc4a1       | GRCh38 - 102 |
| 70326157  | 70342492 Slfn13       | GRCh38 - 102 |
| 74783019  | 74901997 Rgs22        | GRCh38 - 102 |
| 104789423 | 104830898 Hps3        | GRCh38 - 102 |
| 57036877  | 57050408 Grpel2       | GRCh38 - 102 |
| 21831342  | 21832813 Cldn3        | GRCh38 - 102 |
| 101677902 | 101697684 Brox        | GRCh38 - 102 |
| 64567268  | 64657089 Abr          | GRCh38 - 102 |
| 1959610   | 1998102 Rnf212        | GRCh38 - 102 |
| 44038614  | 44078897 N4bp2        | GRCh38 - 102 |
| 62497571  | 62524996 Nfe2l2       | GRCh38 - 102 |
| 25279626  | 25315511 Srd5a2       | GRCh38 - 102 |
| 3904      | 4942 Mt-nd2           | GRCh38 - 102 |
| 20320878  | 20518518 Slit3        | GRCh38 - 102 |
| 209358760 | 209448123 Lrif1       | GRCh38 - 102 |
| 2504695   | 2511749 Atp5f1b       | GRCh38 - 102 |
| 110220283 | 110257367 Dtl         | GRCh38 - 102 |
| 1516804   | 1534488 Cebpz         | GRCh38 - 102 |
| 104941066 | 104942662 Rraga       | GRCh38 - 102 |
| 130135464 | 130151880 Plxnb2      | GRCh38 - 102 |
| 80056755  | 80059996 Snrpd2       | GRCh38 - 102 |
| 100836990 | 100845392 Tbc1d17     | GRCh38 - 102 |
| 4421069   | 4436601 Sgo1          | GRCh38 - 102 |
| 58120179  | 58158052 Npat         | GRCh38 - 102 |
| 27949208  | 27984256 Gfm2         | GRCh38 - 102 |
| 8662579   | 8690305 Zer1          | GRCh38 - 102 |
| 225091612 | 225096390 Ints5       | GRCh38 - 102 |
| 129371556 | 129371973 Snrpe       | GRCh38 - 102 |
| 31040142  | 31055453 Kiaa0408L    | GRCh38 - 102 |
| 146952653 | 146973932 Zfp362      | GRCh38 - 102 |
| 129521991 | 129544506 Tmf1        | GRCh38 - 102 |
| 195074330 | 195096460 Snrpn       | GRCh38 - 102 |
| 37568113  | 37587294 Ripor1       | GRCh38 - 102 |
| 100859349 | 100865894 Ptov1       | GRCh38 - 102 |
| 2374582   | 2378370 Zfp503        | GRCh38 - 102 |
| 84584596  | 84598186 LOC100910046 | GRCh38 - 102 |
| 100874976 | 100887853 Med25       | GRCh38 - 102 |
| 76396784  | 76608864 Ralgapa1     | GRCh38 - 102 |

|           |                          |              |
|-----------|--------------------------|--------------|
| 157095937 | 157126393 Bcap31         | GRCh38 - 102 |
| 28333019  | 28349927 Otud6b          | GRCh38 - 102 |
| 60717386  | 60736609 Ppp2r1a         | GRCh38 - 102 |
| 2625015   | 2630670 Npdc1            | GRCh38 - 102 |
| 222167927 | 222168776 Trmt112        | GRCh38 - 102 |
| 100551307 | 100559447 Srp9           | GRCh38 - 102 |
| 134927609 | 134948529 Lrrc41         | GRCh38 - 102 |
| 136720266 | 136754926 Kif26a         | GRCh38 - 102 |
| 128694803 | 128839433 Osbpl9         | GRCh38 - 102 |
| 22229079  | 22234096 Gnb2            | GRCh38 - 102 |
| 33648682  | 33665821 Rbbp7           | GRCh38 - 102 |
| 105618326 | 105628091 Cygb           | GRCh38 - 102 |
| 207350651 | 207473857 St7l           | GRCh38 - 102 |
| 257425679 | 257449568 Fubp1          | GRCh38 - 102 |
| 235387153 | 235405831 AABR07006458.1 | GRCh38 - 102 |
| 52267254  | 52514875 Nav1            | GRCh38 - 102 |
| 56261637  | 56267213 Mpdu1           | GRCh38 - 102 |
| 70253650  | 70266809 Zim1            | GRCh38 - 102 |
| 157705790 | 157708748 Mrpl51         | GRCh38 - 102 |
| 55865467  | 55916220 Synpo           | GRCh38 - 102 |
| 147476580 | 147487170 Fam110a        | GRCh38 - 102 |
| 14889510  | 15060286 Dab2ip          | GRCh38 - 102 |
| 219144205 | 219183963 Unc93b1        | GRCh38 - 102 |
| 11944958  | 11963268 Csnk1g2         | GRCh38 - 102 |
| 216339154 | 216382260 LOC103689940   | GRCh38 - 102 |
| 5476345   | 5479511 Zbtb22           | GRCh38 - 102 |
| 27768943  | 27815611 Kif3c           | GRCh38 - 102 |
| 70974885  | 70983360 RGD1562987      | GRCh38 - 102 |
| 66888393  | 66926377 Carf            | GRCh38 - 102 |
| 54693959  | 54722563 Slc7a5          | GRCh38 - 102 |
| 198360627 | 198378934 Kctd13         | GRCh38 - 102 |
| 88897532  | 88908750 Aplp1           | GRCh38 - 102 |
| 101480145 | 101500850 Nucb1          | GRCh38 - 102 |
| 226912612 | 226924244 Tmem132a       | GRCh38 - 102 |
| 6049286   | 6086099 Brpf3            | GRCh38 - 102 |
| 168126157 | 168136666 Vamp3          | GRCh38 - 102 |
| 142273833 | 142300382 Bin2           | GRCh38 - 102 |
| 72074108  | 72078551 Rps4x           | GRCh38 - 102 |
| 19767264  | 19769033 Ocel1           | GRCh38 - 102 |
| 80468154  | 80526593 Ckap5           | GRCh38 - 102 |
| 14374358  | 14402010 Wiz             | GRCh38 - 102 |
| 164966637 | 164986180 Dpm1           | GRCh38 - 102 |
| 10570314  | 10661528 Shld2           | GRCh38 - 102 |
| 101427195 | 101447092 Gys1           | GRCh38 - 102 |
| 142185094 | 142197182 Furin          | GRCh38 - 102 |
| 52566607  | 52608817 Usp10           | GRCh38 - 102 |
| 114876770 | 114896573 Dctn1          | GRCh38 - 102 |
| 32239748  | 32269145 Ddx50           | GRCh38 - 102 |
| 30308469  | 30314519 Zbed5           | GRCh38 - 102 |
| 60721135  | 60795951 Atf2            | GRCh38 - 102 |

|           |                         |              |
|-----------|-------------------------|--------------|
| 213991620 | 213993609 Rplp2         | GRCh38 - 102 |
| 44580216  | 44702203 Rfc1           | GRCh38 - 102 |
| 57273005  | 57275708 Pfn1           | GRCh38 - 102 |
| 11154658  | 11174861 Glis2          | GRCh38 - 102 |
| 33037034  | 33075685 Orc4           | GRCh38 - 102 |
| 132607166 | 132663502 Sacm1l        | GRCh38 - 102 |
| 71852682  | 71891143 Fbxl5          | GRCh38 - 102 |
| 60385688  | 60416925 Cpsf6          | GRCh38 - 102 |
| 37171052  | 37227301 Zmym2          | GRCh38 - 102 |
| 52767442  | 52778687 LOC108348161   | GRCh38 - 102 |
| 81237496  | 81241282 Hnrnpa2b1      | GRCh38 - 102 |
| 96023445  | 96088405 Snx14          | GRCh38 - 102 |
| 17115412  | 17208055 Rpgrip1l       | GRCh38 - 102 |
| 146248503 | 146289465 Abhd17c       | GRCh38 - 102 |
| 145138697 | 145186357 Zmym6         | GRCh38 - 102 |
| 24918398  | 24929091 Proc           | GRCh38 - 102 |
| 88279632  | 88307412 Jup            | GRCh38 - 102 |
| 196942364 | 196967220 Il4r          | GRCh38 - 102 |
| 161343883 | 161356815 Pcif1         | GRCh38 - 102 |
| 48521772  | 48563776 Plg            | GRCh38 - 102 |
| 11046909  | 11057254 Herpud1        | GRCh38 - 102 |
| 20589481  | 20592449 Isyna1         | GRCh38 - 102 |
| 11458967  | 11478489 Map2k2         | GRCh38 - 102 |
| 30779150  | 30781292 Taf7           | GRCh38 - 102 |
| 56478384  | 56493923 Impdh1         | GRCh38 - 102 |
| 11295892  | 11315615 Tjp3           | GRCh38 - 102 |
| 140716113 | 140723714 Tuba1c        | GRCh38 - 102 |
| 117514533 | 117538342 Bop1          | GRCh38 - 102 |
| 235816336 | 235831670 Ostc          | GRCh38 - 102 |
| 7097507   | 7103604 Gnl3            | GRCh38 - 102 |
| 84685931  | 84698793 AABR07002774.2 | GRCh38 - 102 |
| 144156175 | 144245545 Esyt2         | GRCh38 - 102 |
| 121918947 | 121931564 Tyms          | GRCh38 - 102 |
| 214428526 | 214430515 LOC100911575  | GRCh38 - 102 |
| 70283710  | 70288568 Ctdsp2         | GRCh38 - 102 |
| 9988055   | 10001962 Slc25a23       | GRCh38 - 102 |
| 76820329  | 76979115 Atrx           | GRCh38 - 102 |
| 53506925  | 53534353 Zfp281         | GRCh38 - 102 |
| 59000397  | 59010903 Mybbp1a        | GRCh38 - 102 |
| 124023995 | 124041594 Cyb5r3        | GRCh38 - 102 |
| 23101     | 31944 Mmp11             | GRCh38 - 102 |
| 78879058  | 78903967 Olah           | GRCh38 - 102 |
| 15207822  | 15214596 Tfeb           | GRCh38 - 102 |
| 42489377  | 42500395 Pbk            | GRCh38 - 102 |
| 88647575  | 88667345 Kcnh4          | GRCh38 - 102 |
| 264059374 | 264072433 Scd2          | GRCh38 - 102 |
| 257614731 | 257791728 LOC100911660  | GRCh38 - 102 |
| 128027958 | 128036236 Acaa1a        | GRCh38 - 102 |
| 195074330 | 195096694 Snurf         | GRCh38 - 102 |
| 82072544  | 82088275 Dedd2          | GRCh38 - 102 |

|           |                          |              |
|-----------|--------------------------|--------------|
| 90188043  | 90218013 Impad1          | GRCh38 - 102 |
| 82886878  | 82893845 LOC100912571    | GRCh38 - 102 |
| 100829552 | 100840504 Bok            | GRCh38 - 102 |
| 33689127  | 33691301 Rhob            | GRCh38 - 102 |
| 198461169 | 198476476 Kif22          | GRCh38 - 102 |
| 226657561 | 226683347 Ddb1           | GRCh38 - 102 |
| 53653116  | 53714879 Zdhhc17         | GRCh38 - 102 |
| 20663541  | 20818128 Wwc1            | GRCh38 - 102 |
| 70250959  | 70259553 Nle1            | GRCh38 - 102 |
| 29056219  | 29121104 Tnpol           | GRCh38 - 102 |
| 209523157 | 209641123 Ebf3           | GRCh38 - 102 |
| 109669680 | 109696918 Nsl1           | GRCh38 - 102 |
| 170772163 | 170810080 Wbp11l1        | GRCh38 - 102 |
| 19886051  | 19894591 Ano8            | GRCh38 - 102 |
| 38274297  | 38294292 Rsrc2           | GRCh38 - 102 |
| 11121041  | 11131548 Vasn            | GRCh38 - 102 |
| 112531703 | 112560634 LOC100911204   | GRCh38 - 102 |
| 50481163  | 50499140 Etnk2           | GRCh38 - 102 |
| 48881049  | 48881881 Ubb             | GRCh38 - 102 |
| 261229347 | 261280536 Ubtd1          | GRCh38 - 102 |
| 19436333  | 19509087 Nkd1            | GRCh38 - 102 |
| 131330913 | 131336183 Alg10          | GRCh38 - 102 |
| 84339261  | 84353725 Pld3            | GRCh38 - 102 |
| 145936827 | 145937813 AABR07010649.1 | GRCh38 - 102 |
| 60024013  | 60048746 Scrn3           | GRCh38 - 102 |
| 76977822  | 77022837 Sltn            | GRCh38 - 102 |
| 75625174  | 75666866 Ice2            | GRCh38 - 102 |
| 106434177 | 106625837 Farp1          | GRCh38 - 102 |
| 39517548  | 39535169 Tmem106b        | GRCh38 - 102 |
| 96210750  | 96288903 Sh3bp4          | GRCh38 - 102 |
| 58448917  | 58458517 AABR07008439.1  | GRCh38 - 102 |
| 2659865   | 2686160 Casp12           | GRCh38 - 102 |
| 21711019  | 21755525 Smc1a           | GRCh38 - 102 |
| 77270811  | 77279831 Tmem128         | GRCh38 - 102 |
| 107323258 | 107327442 Klhl9          | GRCh38 - 102 |
| 138217845 | 138222534 Zfp691         | GRCh38 - 102 |
| 64325435  | 64350773 Hexa            | GRCh38 - 102 |
| 25513892  | 25652473 Pign            | GRCh38 - 102 |
| 156622959 | 156683778 AABR07011013.1 | GRCh38 - 102 |
| 89181165  | 89198213 Wnk4            | GRCh38 - 102 |
| 167686173 | 167708714 Trim21         | GRCh38 - 102 |
| 4369178   | 4378269 Agpat1           | GRCh38 - 102 |
| 66717267  | 66792492 Mon2            | GRCh38 - 102 |
| 157328379 | 157331905 Tpi1           | GRCh38 - 102 |
| 43267057  | 43276685 Actr1b          | GRCh38 - 102 |
| 30766590  | 30780121 Cenph           | GRCh38 - 102 |
| 3767394   | 3794359 Gpsm1            | GRCh38 - 102 |
| 57647291  | 57649827 Exoc8           | GRCh38 - 102 |
| 82248046  | 82266727 Lipe            | GRCh38 - 102 |
| 89293696  | 89510871 Prkdc           | GRCh38 - 102 |

|           |                       |              |
|-----------|-----------------------|--------------|
| 63520991  | 63625134 Apoo         | GRCh38 - 102 |
| 3204390   | 3247695 Glmn          | GRCh38 - 102 |
| 107496072 | 107511348 Plp1        | GRCh38 - 102 |
| 14122878  | 14128983 Hs3st6       | GRCh38 - 102 |
| 265507451 | 265542276 Oga         | GRCh38 - 102 |
| 28835417  | 29015552 Nrg2         | GRCh38 - 102 |
| 42518194  | 42520481 LOC102551526 | GRCh38 - 102 |
| 16084266  | 16112664 Ttyh3        | GRCh38 - 102 |
| 3552929   | 3575780 Ddr1          | GRCh38 - 102 |
| 51042248  | 51076852 Adora1       | GRCh38 - 102 |
| 18996591  | 19030381 Vamp7        | GRCh38 - 102 |
| 65439102  | 65444001 Tlcd1        | GRCh38 - 102 |
| 95161157  | 95302822 Ugt1a6       | GRCh38 - 102 |
| 17421557  | 17446165 Chordc1      | GRCh38 - 102 |
| 8909236   | 8924032 Sh3glb2       | GRCh38 - 102 |
| 5217217   | 5429581 Dync2h1       | GRCh38 - 102 |
| 58016238  | 58019442 Kctd4        | GRCh38 - 102 |
| 55254706  | 55277713 Itm2b        | GRCh38 - 102 |
| 222466575 | 222468896 Cox8a       | GRCh38 - 102 |
| 8599      | 9382 Mt-co3           | GRCh38 - 102 |
| 104193955 | 104263071 Grb2        | GRCh38 - 102 |
| 127686925 | 127705518 Plk4        | GRCh38 - 102 |
| 276291417 | 276309099 Zdhhc6      | GRCh38 - 102 |
| 87237949  | 87281157 Nt5c3a       | GRCh38 - 102 |
| 63016577  | 63047781 Impa2        | GRCh38 - 102 |
| 37018459  | 37186732 Eea1         | GRCh38 - 102 |
| 55772377  | 56171668 Snd1         | GRCh38 - 102 |
| 82503571  | 82511327 Ccdc97       | GRCh38 - 102 |
| 10045375  | 10047507 Alkbh7       | GRCh38 - 102 |
| 109818177 | 109821807 Pycr1       | GRCh38 - 102 |
| 53120656  | 53206516 Pms1         | GRCh38 - 102 |
| 13114569  | 13116743 Mid1ip1      | GRCh38 - 102 |
| 56052643  | 56101803 Rictor       | GRCh38 - 102 |
| 176691329 | 176692271 Pdpf        | GRCh38 - 102 |
| 100475416 | 100483168 Tgoln2      | GRCh38 - 102 |
| 20765296  | 20858504 Cd2ap        | GRCh38 - 102 |
| 151232751 | 151258580 Edem2       | GRCh38 - 102 |
| 184941700 | 185168773 Fam160a1    | GRCh38 - 102 |
| 30291087  | 30344445 Scyl2        | GRCh38 - 102 |
| 148259596 | 148313810 Bcl2l1      | GRCh38 - 102 |
| 174605834 | 174620064 Tmem41b     | GRCh38 - 102 |
| 71264514  | 71269869 Uqcrb        | GRCh38 - 102 |
| 82415605  | 82419288 Tuba4a       | GRCh38 - 102 |
| 11414446  | 11428552 Pias4        | GRCh38 - 102 |
| 24445886  | 24493670 Ints8        | GRCh38 - 102 |
| 110723481 | 110732060 Bahd1       | GRCh38 - 102 |
| 100845563 | 100851960 Akt1s1      | GRCh38 - 102 |
| 147854309 | 147893992 Plxnd1      | GRCh38 - 102 |
| 144865608 | 144871585 Hnrnpa1     | GRCh38 - 102 |
| 5791449   | 5794344 Clpsl2        | GRCh38 - 102 |

|           |                          |              |
|-----------|--------------------------|--------------|
| 27022986  | 27080701 Ltn1            | GRCh38 - 102 |
| 42535701  | 42560174 Tmem33          | GRCh38 - 102 |
| 45833264  | 45851984 Zfp496          | GRCh38 - 102 |
| 111545007 | 111553604 Itpka          | GRCh38 - 102 |
| 76174452  | 76205426 Psma6           | GRCh38 - 102 |
| 142702685 | 142722341 Sf3a3          | GRCh38 - 102 |
| 113824892 | 113872097 Cr1l           | GRCh38 - 102 |
| 46386712  | 46432965 Gata4           | GRCh38 - 102 |
| 143882000 | 143884280 Mfsd5          | GRCh38 - 102 |
| 48648879  | 48810991 Vps41           | GRCh38 - 102 |
| 81367468  | 81426496 Add1            | GRCh38 - 102 |
| 54245950  | 54252225 Cox4i1          | GRCh38 - 102 |
| 47665816  | 47669093 Cdkn2aip        | GRCh38 - 102 |
| 3754968   | 3765917 Dux4             | GRCh38 - 102 |
| 25360164  | 25366806 Mri1            | GRCh38 - 102 |
| 243108432 | 243109080 AABR07006627.1 | GRCh38 - 102 |
| 157864969 | 157877633 Tnfrsf1a       | GRCh38 - 102 |
| 119695013 | 119714302 Rab43          | GRCh38 - 102 |
| 61382118  | 61426320 Zfp52           | GRCh38 - 102 |
| 137670123 | 137674802 Ebna1bp2       | GRCh38 - 102 |
| 109655300 | 109663364 AABR07022144.1 | GRCh38 - 102 |
| 44483875  | 44571331 NEWGENE_1308196 | GRCh38 - 102 |
| 62481323  | 62487227 Hnrnpa3         | GRCh38 - 102 |
| 14352334  | 14353621 AABR07027096.1  | GRCh38 - 102 |
| 63268037  | 63292092 Eif2s3          | GRCh38 - 102 |
| 84678948  | 84693988 Atpsckmt        | GRCh38 - 102 |
| 105281827 | 105298108 Arhgap11a      | GRCh38 - 102 |
| 91596397  | 91657395 Rhpn2           | GRCh38 - 102 |
| 65544373  | 65551043 Trim28          | GRCh38 - 102 |
| 108796182 | 108808048 Fcf1           | GRCh38 - 102 |
| 6205903   | 6219936 Kctd20           | GRCh38 - 102 |
| 75439778  | 75566481 Zdhhc15         | GRCh38 - 102 |
| 67538289  | 67578306 Dnajc10         | GRCh38 - 102 |
| 59156251  | 59214452 Lix1            | GRCh38 - 102 |
| 1999596   | 2073896 Tab2             | GRCh38 - 102 |
| 16106137  | 16194478 Fam120a         | GRCh38 - 102 |
| 27464937  | 27500636 Vps35           | GRCh38 - 102 |
| 220516316 | 220644636 Pacs1          | GRCh38 - 102 |
| 53983182  | 54029027 Tbce            | GRCh38 - 102 |
| 64092226  | 64099277 Tsen34l1        | GRCh38 - 102 |
| 221484316 | 221486633 Sac3d1         | GRCh38 - 102 |
| 12117811  | 12128747 Pofut2          | GRCh38 - 102 |
| 17705212  | 17725378 Tmem63b         | GRCh38 - 102 |
| 138319762 | 138336475 Ybx1           | GRCh38 - 102 |
| 60884761  | 60894948 LOC100365363    | GRCh38 - 102 |
| 44942443  | 44962656 Wsb2            | GRCh38 - 102 |
| 82171497  | 82247544 Myo5c           | GRCh38 - 102 |
| 50668040  | 50684409 RGD1359108      | GRCh38 - 102 |
| 22747547  | 22798214 Tent2           | GRCh38 - 102 |
| 113605657 | 113682482 Ankrd12        | GRCh38 - 102 |

|           |                        |              |
|-----------|------------------------|--------------|
| 156677146 | 156689415 Pink1        | GRCh38 - 102 |
| 214823978 | 214844858 Tollip       | GRCh38 - 102 |
| 24064738  | 24084757 Ypel5         | GRCh38 - 102 |
| 65506874  | 65507968 Calm2         | GRCh38 - 102 |
| 11338083  | 11382043 Dnm1          | GRCh38 - 102 |
| 75643054  | 75644954 LOC100361457  | GRCh38 - 102 |
| 35783623  | 35801614 Mmadhc        | GRCh38 - 102 |
| 157348020 | 157351604 Cdca3        | GRCh38 - 102 |
| 2462466   | 2463790 Rnf208         | GRCh38 - 102 |
| 11033317  | 11047437 Gna11         | GRCh38 - 102 |
| 95884743  | 95945248 Smarcd1       | GRCh38 - 102 |
| 64869026  | 64981384 Creb3l2       | GRCh38 - 102 |
| 123079537 | 123088279 Tob2         | GRCh38 - 102 |
| 255479261 | 255532143 Tnks2        | GRCh38 - 102 |
| 1491368   | 1618151 AABR07016845.1 | GRCh38 - 102 |
| 30255459  | 30321323 Fam135a       | GRCh38 - 102 |
| 26785029  | 26797161 Eef1e1        | GRCh38 - 102 |
| 44025267  | 44039284 Zfp322a       | GRCh38 - 102 |
| 20845576  | 20860789 Cers1         | GRCh38 - 102 |
| 135370822 | 135419704 Zfp280c      | GRCh38 - 102 |
| 122539293 | 122581777 Slc25a17     | GRCh38 - 102 |
| 256035866 | 256088299 Kif11        | GRCh38 - 102 |
| 77284404  | 77347011 Ezh2          | GRCh38 - 102 |
| 136129425 | 136166786 Rnf220       | GRCh38 - 102 |
| 70556019  | 70572614 Dctn2         | GRCh38 - 102 |
| 114927722 | 114940177 Alas1        | GRCh38 - 102 |
| 11272609  | 11294058 Arpc1a        | GRCh38 - 102 |
| 14271017  | 14331486 Rpgr          | GRCh38 - 102 |
| 126511350 | 126648661 Ssbp3        | GRCh38 - 102 |
| 20267581  | 20278814 Map1s         | GRCh38 - 102 |
| 11338306  | 11343070 Ubald1        | GRCh38 - 102 |
| 25666655  | 26051229 Babam2        | GRCh38 - 102 |
| 12532895  | 12536791 Polr2e        | GRCh38 - 102 |
| 120761826 | 120780641 Ddx17        | GRCh38 - 102 |
| 53998560  | 54040836 Asah1         | GRCh38 - 102 |
| 67866940  | 68142864 Myo1d         | GRCh38 - 102 |
| 59527124  | 59587385 Cnot2         | GRCh38 - 102 |
| 82762190  | 82789319 Ctbp1         | GRCh38 - 102 |
| 145785275 | 146099053 Dnah11       | GRCh38 - 102 |
| 3230320   | 3242265 Dnajc14        | GRCh38 - 102 |
| 114724610 | 114812708 Dennd3       | GRCh38 - 102 |
| 157043925 | 157078130 Clstn3       | GRCh38 - 102 |
| 1789900   | 1828606 Esco1          | GRCh38 - 102 |
| 84324442  | 84383687 Farsb         | GRCh38 - 102 |
| 80118029  | 80144789 Igfbp2        | GRCh38 - 102 |
| 121311024 | 121334437 Syng1        | GRCh38 - 102 |
| 100921565 | 100930399 Dtymk        | GRCh38 - 102 |
| 8302950   | 8323293 Ncoa4          | GRCh38 - 102 |
| 32509598  | 32572250 Kpna5         | GRCh38 - 102 |
| 28653592  | 28656937 Cxxc5         | GRCh38 - 102 |

|           |                         |              |
|-----------|-------------------------|--------------|
| 144819420 | 144837583 Cbx5          | GRCh38 - 102 |
| 38895131  | 39035633 AABR07001233.1 | GRCh38 - 102 |
| 45613864  | 45626212 Trim27         | GRCh38 - 102 |
| 151831527 | 151856256 Zdhhc18       | GRCh38 - 102 |
| 145489869 | 145551479 Fancd2        | GRCh38 - 102 |
| 27555412  | 27582995 Hadhb          | GRCh38 - 102 |
| 81819415  | 81833456 Mxd4           | GRCh38 - 102 |
| 60450374  | 60461458 Brix1          | GRCh38 - 102 |
| 176818437 | 176856531 Rtel1         | GRCh38 - 102 |
| 102244681 | 102269272 Cdc42ep4      | GRCh38 - 102 |
| 59783890  | 59844356 Melk           | GRCh38 - 102 |
| 165405168 | 165408320 LOC100912604  | GRCh38 - 102 |
| 219850037 | 219853329 Lrfn4         | GRCh38 - 102 |
| 11737293  | 11746703 Lingo3         | GRCh38 - 102 |
| 10430847  | 10431400 Rpl21          | GRCh38 - 102 |
| 157524513 | 157535664 Nbl1          | GRCh38 - 102 |
| 22617388  | 22647506 Ints10         | GRCh38 - 102 |
| 90802393  | 90843485 Edaradd        | GRCh38 - 102 |
| 56848369  | 56850085 Rnasek         | GRCh38 - 102 |
| 54031316  | 54034350 Bbs10          | GRCh38 - 102 |
| 260153645 | 260178349 Zfp518a       | GRCh38 - 102 |
| 36576020  | 36587839 Bri3bp         | GRCh38 - 102 |
| 137137980 | 137147575 Snrpb2        | GRCh38 - 102 |
| 73618644  | 73883812 Stk3           | GRCh38 - 102 |
| 85162452  | 85201757 Pak4           | GRCh38 - 102 |
| 70421599  | 70422443 AC141377.2     | GRCh38 - 102 |
| 6929978   | 6956984 Uspl1           | GRCh38 - 102 |
| 135470915 | 135509221 Slc25a14      | GRCh38 - 102 |
| 154463109 | 154490851 Tti1          | GRCh38 - 102 |
| 61913589  | 61919874 RGD1305464     | GRCh38 - 102 |
| 221710670 | 221725656 Map4k2        | GRCh38 - 102 |
| 62212982  | 62260105 Tbc1d2         | GRCh38 - 102 |
| 67242271  | 67301102 Dennd2a        | GRCh38 - 102 |
| 95397991  | 95405285 AABR07003056.1 | GRCh38 - 102 |
| 15785410  | 15790366 Zfp955a        | GRCh38 - 102 |
| 143932739 | 143946466 Alg5          | GRCh38 - 102 |
| 10770574  | 10826895 Rspry1         | GRCh38 - 102 |
| 8125526   | 8177781 Ube2e1          | GRCh38 - 102 |
| 9625177   | 9709347 Mapk8           | GRCh38 - 102 |
| 124149751 | 124198200 Arfgap3       | GRCh38 - 102 |
| 58022238  | 58070068 Hat1           | GRCh38 - 102 |
| 83869704  | 83888823 Ube2z          | GRCh38 - 102 |
| 57883849  | 57907826 Cpa4           | GRCh38 - 102 |
| 150202058 | 150244372 Ret           | GRCh38 - 102 |
| 25253010  | 25255938 Rbm12b         | GRCh38 - 102 |
| 19769968  | 19777414 Nr2f6          | GRCh38 - 102 |
| 100624876 | 100658050 Septin2       | GRCh38 - 102 |
| 57396606  | 57422093 RGD1559896     | GRCh38 - 102 |
| 12179203  | 12186656 Mbd3           | GRCh38 - 102 |
| 163160979 | 163263606 Acer3         | GRCh38 - 102 |

|           |                         |              |
|-----------|-------------------------|--------------|
| 135107271 | 135112775 Hsp90aa1      | GRCh38 - 102 |
| 85580828  | 85597493 Aldh9a1        | GRCh38 - 102 |
| 126353223 | 126378610 Golga5        | GRCh38 - 102 |
| 11392437  | 11400805 Dapk3          | GRCh38 - 102 |
| 110918243 | 110942917 Rad51         | GRCh38 - 102 |
| 45074072  | 45127815 Dars           | GRCh38 - 102 |
| 19886382  | 19903742 Zfp317         | GRCh38 - 102 |
| 64952119  | 64964862 Pipox          | GRCh38 - 102 |
| 171456302 | 171459488 Tprg1l        | GRCh38 - 102 |
| 84669914  | 84675741 Cbx1           | GRCh38 - 102 |
| 156668712 | 156676035 Ddost         | GRCh38 - 102 |
| 52128     | 52865 LOC100909715      | GRCh38 - 102 |
| 81779380  | 81797236 Arhgef1        | GRCh38 - 102 |
| 55955389  | 55992885 Ndst1          | GRCh38 - 102 |
| 198228387 | 198233588 Aldoa         | GRCh38 - 102 |
| 48025663  | 48033396 Tcp1           | GRCh38 - 102 |
| 87199313  | 87221892 Spint2         | GRCh38 - 102 |
| 31867981  | 31892863 Abce1          | GRCh38 - 102 |
| 48644604  | 48650220 Rab29          | GRCh38 - 102 |
| 11607225  | 11619593 St6galnac4     | GRCh38 - 102 |
| 57738321  | 57778723 Ubap1          | GRCh38 - 102 |
| 148722231 | 148755520 Eif2a         | GRCh38 - 102 |
| 100808241 | 100810522 Atf5          | GRCh38 - 102 |
| 86600877  | 86625083 Arglu1         | GRCh38 - 102 |
| 140637287 | 140640953 Tuba1a        | GRCh38 - 102 |
| 61870347  | 61872975 AABR07001910.1 | GRCh38 - 102 |
